# Supplementary material for: Viral Mimicry as a Design Template for Nucleic Acid Nanocarriers
Source: Frontiers journal article supplement (doi:10.3389/fchem.2021.613209), 2021-03-10
Supplement: Data_Sheet_1.PDF [file Data_Sheet_1.PDF]

# Virus Structure and Mechanism Inform the Design of Nucleic Acid Delivery Systems – Mimicry as a Design Template for Nucleic Acid Nanocarriers

1 Ina F. de la Fuente<sup>1</sup>, ~~Mark O. Tolentino<sup>1</sup>~~, Shradha S. Sawant<sup>1</sup>, ~~Mark O. Tolentino<sup>1</sup>~~, Patrick  
2 M. Corrigan<sup>1</sup>, Jessica L. Rouge<sup>1,\*</sup>

3 <sup>1</sup>Department of Chemistry, University of Connecticut, Storrs, CT 06269, USA

## 4 \* Correspondence:

5 Jessica L. Rouge

6 jessica.rouge@uconn.edu

7 **Keywords:** nucleic acid delivery, viral mimicry, endosomal escape, nuclear targeting,  
8 nanoparticles

## 9 Abstract

10 Therapeutic nucleic acids hold immense potential in combating undruggable, gene-based  
11 diseases owing to their high programmability and relative ease of synthesis. While the delivery of this  
12 class of therapeutics has successfully entered the clinical setting, extrahepatic targeting and endosomal  
13 escape efficiency remain as major roadblocks. On the other hand, viruses serve as natural carriers of  
14 nucleic acids and have acquired a plethora of structures and mechanisms that confer remarkable  
15 transfection efficiency. ~~Thus, understanding the structure and mechanism of viruses can guide the  
16 design of synthetic nucleic acid vectors. However, while viruses have inspired the development of  
17 nucleic acid carriers, their delivery efficiency far outplays that of synthetic vectors. This underscores  
18 how our current understanding of viral mechanism and nucleic acid transfection falls short in  
19 translation to rational design.~~ This review revisits relevant structural and mechanistic features of  
20 viruses as design considerations for efficient nucleic acid delivery systems. This article explores how  
21 viral ligand display and a metastable structure are central to the molecular mechanisms of attachment,  
22 entry, and viral genome release. For comparison, accounted for are details on the design and  
23 intracellular fate of existing nucleic acid carriers and nanostructures that share similar and essential  
24 features to viruses. The review, thus, highlights unifying themes of viruses and nucleic acid delivery  
25 systems such as genome protection, target specificity, and controlled release. Sophisticated viral  
26 mechanisms that are yet to be exploited in oligonucleotide delivery are also identified as they could  
27 further the development of next-generation nonviral nucleic acid vectors.

## 29 1 Introduction

30 ~~Undruggable targets are disease-implicated proteins that lack easy-to-bind pockets where conventional  
31 therapeutics like small molecules can bind (Duffy and Crown 2021; Crews 2010). However, around  
32 80% of the human proteome (Duffy and Crown 2021) is difficult to reach or target (Verdine and  
33 Walensky 2007)(Crews 2010). The past decade has shown enormous progress in targeting the  
34 previously thought to be unreachable sites such as growth factors, enzymes, defective genes, or nuclear  
35 transcription factors (Lazo and Sharlow 2016). In particular, therapeutic nucleic acids (TNAs) such  
36 as small interfering RNAs (siRNAs) (siRNAs), microRNAs (miRNAs) (miRNAs), antisense~~

**Style Definition:** Heading 1: Outline numbered + Level: 1 +  
Numbering Style: 1, 2, 3, ... + Start at: 1 + Alignment: Left +  
Aligned at: 0" + Tab after: 0.39" + Indent at: 0.39"

**Style Definition:** Heading 2: Font: Bold, Outline numbered  
+ Level: 2 + Numbering Style: 1, 2, 3, ... + Start at: 1 +  
Alignment: Left + Aligned at: 0" + Tab after: 0.39" + Indent  
at: 0.39"

**Style Definition:** Heading 3: Outline numbered + Level: 3 +  
Numbering Style: 1, 2, 3, ... + Start at: 1 + Alignment: Left +  
Aligned at: 0" + Tab after: 0.39" + Indent at: 0.39"

**Formatted:** Not Highlight

**Formatted:** Font color: Auto

**Formatted:** Space Before: 0 pt

**Formatted:** Not Highlight

**Formatted:** Justified

**Formatted:** Not Highlight

**Formatted:** Not Highlight

**Formatted:** Not Highlight

**Formatted:** Not Highlight

## Virus Structure and Mechanism Inform the Design of Nucleic Acid Delivery Systems

oligonucleotides (ASOs) (ASOs), synthetic messenger RNAs (mRNAs) (mRNAs), and CRISPR-Cas9-guide RNAs are programmable, easy to synthesize, and thus have the potential to treat previously undruggable diseases such as Parkinson's disease, cancer, and viral diseases (Dowdy 2017). They hold great promise in treating the root cause of the disease rather than just treating the symptoms by targeting the mutated genes or proteins with high specificity and selectivity (Brady 2020). –The challenge lies in delivery (Dowdy and Levy 2018; Dowdy 2017; Johannes and Lucchino 2018; R.L. Juliano 2018).

Formatted: Not Highlight

–For billions of years, cells have evolved to keep genomic material on one side of the membrane. Thus, transfection by bare nucleic acids across an anionic lipid barrier is fundamentally prevented by the large size and density of negative charges (Dowdy and Levy 2018; Dowdy 2017; Johannes and Lucchino 2018). Furthermore, medical translation necessitates a successful *in vivo* delivery. This is particularly challenging given the limited systemic stability of unmodified nucleic acids. Thus, an ideal delivery strategy should include nucleic acid protection from nuclease degradation and oxidation, prolonged systemic circulation, targeted delivery, efficient transfection across a membrane, facilitated access to the cytoplasm or nucleus, and little to no side effects (Zhu and Mahato 2010). While progress has been made in designing and implementing safe, effective, and efficient nucleic acid delivery systems, realizing their therapeutic potential is, at present, challenged mainly by the lack of cellular target diversity and endosomal escape ability (Dowdy and Levy 2018; Dowdy 2017; Johannes and Lucchino 2018; R.L. Juliano 2018). Therapeutic nucleic acids (TNAs) such as small interfering RNAs (siRNAs), microRNAs (miRNAs), antisense oligonucleotides (ASOs), synthetic messenger RNAs (mRNAs), and CRISPR-Cas9 guide RNAs are programmable, easy to synthesize, and thus have the potential to treat previously undruggable diseases such as Parkinson's disease, cancer, and viral diseases. The challenge lies in delivery (Dowdy and Levy 2018; Dowdy 2017; Johannes and Lucchino 2018; R.L. Juliano 2018). For billions of years, cells have evolved to keep genomic material on one side of the membrane. Thus, transfection by bare nucleic acids across an anionic lipid barrier is fundamentally prevented by large size and density of negative charge (Dowdy and Levy 2018; Dowdy 2017; Johannes and Lucchino 2018). Furthermore, medical translation necessitates a successful *in vivo* delivery. This is particularly challenging given the limited systemic stability of unmodified nucleic acids. Thus, an ideal delivery strategy should include nucleic acid protection from nuclease degradation and oxidation, prolonged systemic circulation, targeted delivery, efficient transfection across a membrane, facilitated access to the cytoplasm or nucleus, and little to no side effects (L. Zhu and Mahato 2010). While progress has been made in designing and implementing safe, effective, and efficient nucleic acid delivery systems, realizing their therapeutic potential is, at present, challenged mainly by the lack of target diversity and endosomal escape ability (Dowdy and Levy 2018; Dowdy 2017; Johannes and Lucchino 2018; R.L. Juliano 2018).

Formatted: Space Before: 6 pt, After: 12 pt

In contrast, viruses have evolved a diversity of enabling architectures for the infiltration of various host cells and controlled viral genome replication using the host cell machinery (Flint et al. 2015). (Flint et al. 2015). While they have become longstanding models for engineering the transfection of therapeutic nucleic acids (Figure 1), their delivery efficiency far outplays that of synthetic vectors (Ni et al. 2016). (Ni et al. 2016). This underscores how our current molecular understanding of viral function and how this relates to nucleic acid transfection falls short can be improved to achieve more effective *in*-translation to rational design.

Formatted: Font: Bold

This review, therefore, details the structure and intracellular fate of existing nucleic acid delivery strategies whose designs are either directly inspired by viruses or their resulting formulation exhibits many similarities to that of viruses. Hence, relevant structural and mechanistic features of viruses as design considerations for viable nucleic acid delivery systems are examined. This article also explores how a dynamic and stimulus-responsive structure can play an important role in designing an effective

## Virus Structure and Mechanism Inform the Design of Nucleic Acid Delivery Systems

83 nucleic acid carrier. Importantly, it also highlights how sophisticated ligand display is central to the  
84 molecular mechanisms of carrier trafficking and nucleic acid release.

### 85 2 General Structure of Nucleic Acid Carriers and Mechanism of Protection

86 An ideal carrier packs, stores, and protects nucleic acid cargo until it has reached the target site. In that  
87 regard, this section provides examples of select viruses and nonviral nucleic acid vectors and discusses  
88 their structural features relevant to the efficient packing and protection of nucleic acids. Figure 2  
89 presents examples of common viruses to show that despite differences in sizes and shapes, viruses  
90 collectively protect their genome through condensation and encapsulation. In addition to these two  
91 mechanisms of nucleic acid protection, nonviral carriers also use chemical modifications, self-  
92 generated sterics, or a combination of these strategies to achieve the same effect.

#### 93 2.1 Structure of Viruses and Genome Protection

94 Viruses are obligate intracellular parasites (Gelderblom 1996). They have evolved to transfect their  
95 DNA or RNA genome into the host cell for expression and subsequent production of more virus  
96 particles (Prasad and Schmid 2011). At the core of virus structure are structural proteins that serve to  
97 protect the viral genome until it is delivered to the target site. These structural proteins assemble to  
98 form the viral capsid, which is the protein coat that wraps around the genome. The high degree of  
99 folding and dense packing of capsid proteins protect them from proteolytic digestion, making them  
100 stable carriers of nucleic acid cargo (Flint et al. 2015). Moreover, the viral genome is typically  
101 condensed by viral proteins through charge neutralization (Gelderblom 1996), allowing confinement  
102 within the interior of the capsid. Enveloped viruses possess an outer lipid envelope that provides  
103 additional encapsulation and can fuse with the host plasma membrane during uptake or endosomal  
104 escape. The protein components encoded by the viral genome display highly specific and often,  
105 multiple, roles essential for structural integrity, attachment, and replication in the host cell (Flint et al.  
106 2015).

107 For example, the main components of the influenza virus are the lipid bilayer, glycoprotein spikes  
108 hemagglutinin and neuraminidase, matrix proteins (M1 and M2), the heterotrimeric RNA-dependent  
109 RNA polymerase (RdRP), the viral RNA segments, a nucleoprotein (NP), and two nonstructural  
110 proteins (NS1 and NS2 a.k.a. nuclear export protein or NEP). The outermost layer of the virus is a  
111 lipid membrane decorated with glycoproteins that, in turn, may be recognized by antibodies to protect  
112 the host against infection (James and Whitley 2017). Thus, these glycoproteins are critical in both  
113 immune response and the development of therapeutics. Hemagglutinin, specifically its subunit HA1,  
114 is responsible for the targeting of and uptake by the host cells. HA1 binds to sialic acid functionalized  
115 cell surface receptors, resulting in receptor-mediated endocytosis. The lipid bilayer is stabilized by  
116 M1 on its cytoplasmic periphery and is spanned by M2, a proton ionophore. The core of the virion  
117 contains the viral genome as well as proteins essential for viral gene replication (RdRP), gene  
118 encapsulation (NP), and nuclear translocation (NEP). Each protein-coding ssRNA segment is coated  
119 by NPs and associated with an RdRP, forming a ribonucleoprotein (RNP) complex that is anchored to  
120 M1. The viral envelope of influenza virus has been used as a carrier for nucleic acids such as siRNA  
121 (de Jonge et al. 2006) and miRNA (Junwei Li, Arévalo, and Zeng et al. 2013). Particularly, the  
122 reconstituted influenza virus membrane envelope, called “virosome,” acts as an efficient carrier to  
123 target small nucleic acid such as siRNA in vitro as well as in vivo (de Jonge et al. 2006). As per this  
124 study, the functional integrity of HA viral protein helps in membrane fusion and efficient cytosolic  
125 delivery of siRNA.

Formatted: Justified

Formatted: Justified, Space Before: 12 pt, After: 0 pt, Tab stops: 0.63", Left

Formatted: Font color: Auto

Formatted: Font color: Auto, Not Highlight

Formatted: Font color: Auto

Formatted: Justified

Formatted: Font color: Auto

Formatted: Font color: Auto

Formatted: Font color: Auto, Not Highlight

Formatted: Font color: Auto

Formatted: Font color: Auto

Formatted: Font color: Auto

Formatted: Not Highlight

Formatted: Font color: Auto

Formatted: Not Highlight

Formatted: Font color: Auto

Formatted: Font color: Auto, Not Highlight

Formatted: Not Highlight

Formatted: Font color: Auto, Not Highlight

Formatted: Not Highlight

Formatted: Font color: Auto, Not Highlight



## Virus Structure and Mechanism Inform the Design of Nucleic Acid Delivery Systems

### 170 2.2 Strategies for nucleic acid protection by nonviral carriers

171 While the ability of viruses and VLPs to efficiently encapsulate and transfect nucleic acids is  
172 remarkable, they are structurally more complex and, thus, typically require hosts for production and  
173 subsequent purification (Roldão et al. 2017), both of which may come at a high cost. Moreover, viruses  
174 and VLPs have a higher risk of triggering an immune response (Xue et al. 2015) and possess limited  
175 chemistry (Wagner 2012). Therefore, tuning properties such as target specificity, particle stability, and  
176 subcellular localization is restricted, motivating the construction of non-viral vectors (Wagner 2012).  
177 Beyond condensation and encapsulation, this section lists other strategies that have been employed for  
178 efficient protection of nucleic acid cargo such as chemical modifications and self-generated sterics.  
179 Furthermore, these strategies are often combined for enhanced protection.

#### 180 2.2.1 (Corey 2007; Judge et al. 2006; Whitehead, Langer, and Anderson 2009)(Whitehead, 181 Langer, and Anderson 2009)(Judge et al. 2005; 2006)(Jackson et al. 2006)Condensation by 182 Cationic Materials

183 Viral assembly mainly involves electrostatic interactions between the capsid proteins and genomic  
184 cargo. Similarly, many first-generation designs of delivery agents relied on the electrostatic masking  
185 of the polyanionic backbone of nucleic acids for successful delivery into cells. Whereas viruses protect  
186 their nucleic acid cargo via capsid encapsulation, cationic materials such as natural and synthetic  
187 polymers, dendrimers, proteins, peptides, and cationic lipids as well as inorganic nanoparticles bearing  
188 a positive charge (to be discussed in Section 2.2.4) form an electrostatic interaction with the negative  
189 phosphate backbone of the nucleic acid cargo, providing protection from nuclease degradation  
190 (Thomas and Klibanov 2003; Moret et al. 2001; Ferrari et al. 1999). This can be ascribed to the  
191 compaction of nucleic acids, which results in the blockage of enzymatic digestion sites, thereby  
192 conferring nuclease protection (Feng et al. 2015).

193 Electrostatic interactions also strengthen viral attachment to the surface of negatively-charged host  
194 cells. Thus, viruses such as the hepatitis C virus (Penin et al. 2001) and the influenza virus  
195 (Arinaminpathy and Grenfell 2010) have conserved cationic regions in their glycoproteins that aid in  
196 membrane binding. In the same light, synthetic polycationic nucleic acid carriers not only allow  
197 compaction and protection from nuclease degradation but they also mediate cellular attachment and  
198 entry (Mislick and Baldeschwieler 1996). However, this uptake mechanism is nonspecific, and  
199 polymeric materials tend to form aggregates with components of the blood such as serum proteins. For  
200 this reason, nonionic, hydrophilic polymers such as PEG are commonly added to confer stealth  
201 (Klibanov et al. 1990; Takemoto et al. 2014). Additionally, the structural flexibility of PEG makes its  
202 integration into different formulations very convenient. However, while PEG-ylation imparts blood  
203 compatibility and circulation longevity (Takemoto et al. 2014), it can compromise cellular uptake  
204 and/or endosomal escape (Fang et al. 2017).

205 To address this limitation, PEG-ylation typically involves responsive linkages that can be cleaved by  
206 cellular cues such as low pH or external stimuli such as temperature (Fang et al. 2017). An alternative  
207 way of using cleavable PEG was demonstrated by Li and co-workers (2013), where they used MMP-  
208 7-cleavable peptides as linkers. Matrix Metalloproteinase-7 (MMP-7) belongs to a class of zinc-  
209 dependent, extracellular proteases that are overexpressed on the surface of breast tumor cells. In their  
210 construct, the outer surface of the polymer-based siRNA-delivery vector was decorated with PEG  
211 attached to the core of the particle using a peptide substrate of MMP-7. When the peptide substrate  
212 came to contact with MMP-7, the PEG outer layer was cleaved off, revealing a highly cationic  
213 dimethylaminoethyl methacrylate core that then engages the membrane, facilitating uptake. Thus, the

Formatted: Justified

Formatted: Font color: Auto

Formatted: Space After: 12 pt

Formatted: Not Highlight

Formatted: Font color: Auto

Formatted: Justified

Formatted: Font color: Auto

Formatted: Not Highlight

Formatted: Font: Bold, Not Highlight

Formatted: Not Highlight

Formatted: Font color: Auto, Not Highlight

Formatted: Not Highlight

Formatted: Font color: Auto, Not Highlight

Formatted: Not Highlight

Formatted: Font color: Auto, Not Highlight

Formatted: Font color: Auto



## Virus Structure and Mechanism Inform the Design of Nucleic Acid Delivery Systems

214 [selective attachment and entry of the resulting construct is afforded through proximity activation by](#)  
215 [MMP-7.](#)

216 [Peptide-based vectors tend to rely on positive charge character to condense nucleic acids for packaging](#)  
217 [and protection. In particular, these consist of cationic amphiphilic peptides that are composed of a](#)  
218 [hydrophobic and a hydrophilic domain that form a well-defined nanoparticle \(Kang et al. 2019\). The](#)  
219 [hydrophobic region consists of non-polar neutral amino acids whereas the hydrophilic region has polar](#)  
220 [aliphatic residues. These peptides self-assemble to form a micellar structure. Small molecule drugs](#)  
221 [and DNA can be co-delivered using these multifunctional micelle-plexes, where each peptide plays a](#)  
222 [different role. For example, displaying a cell penetrating peptide on the surface facilitates binding and](#)  
223 [entry. Histidine residues cause endosomal escape while lysine residues condense DNA. These types](#)  
224 [of complexes have been used to deliver siRNA and plasmid DNA. Recent studies have also shown that](#)  
225 [the addition of stearyl, an alkyl chain, or cholesterol to the hydrophobic domain of self-assembled](#)  
226 [peptides further enhances DNA condensation and transfection efficiency \(Kang et al. 2019\).](#)

227 [In addition, highly branched polypeptides are used as hybrid-peptide based gene delivery vehicles.](#)  
228 [This is achieved by covalently joining multi-functional peptide sequences. Functional peptides are](#)  
229 [separated by spacers such as repeats of glycine residues that confer flexibility. Nucleic acids are also](#)  
230 [packed by condensation. Redox-active disulfide bonds can be used to connect peptides in a branched](#)  
231 [fashion, delivering genes more efficiently than linear counterparts. These disulfide bonds are then](#)  
232 [reduced in the cytoplasm by glutathione to liberate the nucleic acid cargo as well as to reduce](#)  
233 [cytotoxicity. Highly branched arginine-rich polypeptides are multivalent and flexible – attributes](#)  
234 [beneficial for nucleic acid compaction and cellular entry. Many of these reducible multibranched](#)  
235 [cationic polypeptides have the potential to be non-toxic, degradable vectors for gene delivery \(Kang et](#)  
236 [al. 2019\).](#)

237 [Among various polycationic formulations, materials based on synthetic polymers such as polymeric](#)  
238 [nanoparticles, dendrimers, polymer micelles, polymersomes, polyplexes, and lipopolyplexes have](#)  
239 [benefited from their chemical diversity, relatively simple design, and potential for multi-functionality](#)  
240 [\(Takemoto et al. 2014; Yuan and Li 2017\). The chemistry, molecular weight, weight relative to the](#)  
241 [nucleic acid, and overall topology of the polymer determine its stability and transfection efficiency.](#)  
242 [Intracellularly cleavable linkages are typically inserted within the polymeric chain, affording a](#)  
243 [dynamic structure that reveals the nucleic acid payload in response to a site-specific stimulus \(Troiber](#)  
244 [and Wagner 2011\).](#)

245 [In a similar sense, multiblock copolymers impart modularity and enable multifunctionality. As an](#)  
246 [example, polymeric carriers are often based on the electrostatic condensation and shielding by a](#)  
247 [cationic polymer such as polydimethylaminoethyl methacrylate \(pDMAEA\). pDMAEA can then be](#)  
248 [copolymerized with a second block of P\(N-\(3-\(1H-imidazol-1-yl\)propyl\)acrylamide \(PImPAA\) and](#)  
249 [poly\(butyl acrylate\) \(pBA\) that mediates an acid-triggered endosomal escape. PImPAA and PBA](#)  
250 [were designed based on viral membranolytic peptides, and they disrupt the endosomal membrane](#)  
251 [synergistically through electrostatic and hydrophobic interactions, respectively \(Gillard et al. 2014;](#)  
252 [Truong et al. 2013\). Such cationic polymer-based carriers serve as valuable tools for assessing the](#)  
253 [potency of nucleic acids under study. At this time, structural heterogeneity, imprecise surface](#)  
254 [conjugation, lack of structure-function insights, and cytotoxicity at therapeutically effective](#)  
255 [formulations currently hamper their clinical utility \(Troiber and Wagner 2011; Lv et al. 2006\).](#)

Formatted: Font color: Auto, Not Highlight

Formatted: Font color: Auto

Formatted: Font color: Auto, Not Highlight

Formatted: Font color: Auto

Formatted: Font color: Auto, Not Highlight

Formatted: Not Highlight

Formatted: Font color: Auto, Not Highlight

Formatted: Font color: Auto

Formatted: Font color: Auto, Not Highlight

Formatted: Not Highlight

Formatted: Font color: Auto, Not Highlight

Formatted: Font color: Auto

Field Code Changed

Formatted: Font color: Auto

Formatted: Font color: Auto

Formatted: Font color: Auto

Field Code Changed

Formatted: Font color: Auto

Formatted: Font color: Auto

Formatted: Font color: Auto

Field Code Changed

Formatted: Font color: Auto

Formatted: Font color: Auto

Formatted: Font color: Auto

Formatted: Font color: Auto, Not Highlight

Formatted: Font color: Auto

Formatted: Font color: Auto

Formatted: Font color: Auto

## Virus Structure and Mechanism Inform the Design of Nucleic Acid Delivery Systems

### 256 2.2.2 Encapsulation by Lipid-based Vectors

257 Nucleic acid protection through charge neutralization and condensation by cationic materials may only  
258 provide partial nuclease resistance (Moret et al. 2001). Moreover, additional encapsulation by lipid  
259 membranes to form lipopolyplexes has been shown to enhance protection from nucleases and the  
260 overall therapeutic efficacy of nucleic acids (Yen et al. 2018). For this reason, lipid-based vectors such  
261 as liposomes and solid lipid nanoparticles are commonly explored as nucleic acid carriers (Barba et al.  
262 2019). Compared to other nucleic acid delivery systems, lipid-based carriers offer ease of  
263 manufacturing and scalability. Their lipid formulation mimics the lipid bilayer, imparting  
264 biocompatibility and conveniently facilitating cellular uptake (Ghasemiyeh and Mohammadi-Samani  
265 2018).

266 Among these, liposomes have shown the most promise (Barba et al. 2019). They are spherical vesicles  
267 made of a lipid bilayer with an aqueous core (Barba et al. 2019; Kulkarni et al. 2018) and can be  
268 designed to carry both hydrophilic and lipophilic cargo (Barba et al. 2019; Ghasemiyeh and  
269 Mohammadi-Samani 2018). The earliest work demonstrating liposome-mediated gene delivery was  
270 in 1980 by Fraley et al. (Fraley et al. 1980) when SV40 DNA was encapsulated and delivered using  
271 large unilamellar vesicles. They found that using PS exhibited the highest delivery efficiency. Felgner  
272 et al. (Felgner et al. 1987) then showed that using synthetic cationic lipids such as DOTMA resulted  
273 in a higher transfection efficiency. Since then, cationic lipids bearing different structure modifications  
274 such as DOTAP, DOSPA, DMR1E, and DL-cholesterol have been incorporated in liposome-based  
275 gene delivery systems (Zhi et al. 2013; Yin et al. 2014). For anionic cargo such as nucleic acids, the  
276 cationic head group permits condensation of the large biomolecule (Zhi et al. 2013). Moreover,  
277 polycationic head groups such as polyamines can be used to form polycationic liposomes. These  
278 combine the ability of cationic liposomes to complex nucleic acids and that of polycations to mediate  
279 endosomal escape via the proton sponge effect (Yamazaki et al. 2000; Sugiyama et al. 2004; Asai et  
280 al. 2011; Yonenaga et al. 2012). Nonionic lipids such as fusogenic DOPE and cholesterol can also be  
281 incorporated into the liposome to further enhance its stability and delivery efficiency (Wasungu and  
282 Hoekstra 2006).

283 Modular release usually centers on the lipid formulation where the lipid envelope is destabilized either  
284 by an external stimulus such as temperature or an cellular stimulus such as low pH (Heidari-  
285 Dadashzadeh, and Haeriet al. 2017; Abri Aghdam et al. 2019). As an example, Yatvin et al. (1978)  
286 introduced the idea that liposomes can preferentially release cargo at the diseased site in response to  
287 mild hyperthermic temperature (around 40°C). This was initially achieved using DPPC alone or with  
288 DSPC, which has a phase-transition temperature of 42-44°C, above which its membrane permeability  
289 increases (Kono et al. 2010; Abri Aghdam et al. 2019). Among efforts that followed on the construction  
290 of heat-responsive liposomes (Matsumura and Maeda 1986; Maruyama et al. 1993; Gaber et al. 1995;  
291 Tomita et al. 1989; Anyarambhatla and Needham 1999; Needham et al. 2000). Anyarambhatla and  
292 Needham (1999) notably incorporated a lysolipid to DPPC to bring down the phase-transition  
293 temperature to a clinically achievable range (39-40 °C) and initiate release within tens of seconds  
294 (Needham et al. 2000). As this design only achieved 50% cargo release within an hour at 42°C  
295 (Needham et al. 2000), succeeding studies focused on modulating the temperature-responsiveness of  
296 liposomes. One strategy is the incorporation of thermosensitive polymers that can impart a sharp and  
297 tunable phase transition temperature to the liposome. Upon heating, the polymeric components form  
298 hydrophobic domains that disrupt the lipid bilayer (Kono et al. 2010).

299 On the other hand, pH-sensitive liposomes exploit the differential acidification in the vicinity of  
300 malignant tumors or within endosomes for controlled release via membrane fusion or destabilization

Formatted: Justified

Formatted: Font color: Auto, Not Highlight

Formatted: Not Highlight

Formatted: Font color: Auto, Not Highlight

Formatted: Not Highlight

Formatted: Font color: Auto

Formatted: Font color: Auto, Not Highlight

Formatted: Font color: Auto

Formatted: Font color: Auto

Formatted: Font color: Auto

Formatted: Font color: Auto

Formatted: Font color: Auto, Not Highlight

Formatted: Font color: Auto

Formatted: Not Highlight

Formatted: Font color: Auto

Formatted: Font color: Auto

Formatted: Font color: Auto, Not Highlight

Formatted: Font color: Auto

Formatted: Font color: Auto

Formatted: Font color: Auto, Not Highlight

Formatted: Font color: Auto

Formatted: Font color: Auto, Not Highlight

Formatted: Font color: Auto

Formatted: Font color: Auto, Not Highlight

Formatted: Font color: Auto

Formatted: Font color: Auto, Not Highlight

Formatted: Font color: Auto

Formatted: Font color: Auto, Not Highlight

Formatted: Font color: Auto

Formatted: Font color: Auto

Formatted: Font color: Auto, Not Highlight

Formatted: Font color: Auto

Formatted: Font color: Auto, Not Highlight

Formatted: Font color: Auto

Formatted: Font color: Auto, Not Highlight

Formatted: Font color: Auto

Formatted: Font color: Auto

Formatted: Font color: Auto

Formatted: Not Highlight

Formatted: Font color: Auto, Not Highlight

Formatted: Font color: Auto

## Virus Structure and Mechanism Inform the Design of Nucleic Acid Delivery Systems

301 [\(Yatvin et al. 1980; Budker et al. 1996; Heidari, Dadashzadeh, and Haeri et al. 2017\)](#). Earlier anionic  
302 pH-responsive designs were constructed with a bilayer rich in PE that is stabilized by anionic lipids  
303 containing carboxylate head groups at physiological pH (Budker et al. 1996). PE typically forms an  
304 inverted hexagonal phase on its own (Chernomordik, Kozlov, and Zimmerberg et al. 1995). Thus,  
305 when the anionic carboxylate head groups are protonated in a region of lower pH, the PE-rich bilayer  
306 is disrupted (Budker et al. 1996). While there were reports on using anionic liposomes for nucleic acid  
307 delivery (Legendre and Szoka 1992; C. Y. Wang and Huang 1989), their negative charge limits both  
308 the efficient packing of polyanionic nucleic acids and interaction with the negatively charged cellular  
309 membrane. For this reason, cationic pH-sensitive liposomes were developed. These contain a weakly  
310 basic lipid component such as DOTAP and DODAP that have a pKa slightly below physiological pH  
311 (Budker et al. 1996; Sato et al. 2012).

312 ~~Certain early formulations of lipid-based carriers were limited in part by toxicity and immunogenicity~~  
313 ~~at high lipid concentrations, as well as by low bioavailability and low biodistribution (Zatsepin et al.~~  
314 ~~2016; Huggins et al. 2019). Overtime these formulations have been significantly improved. In addition,~~  
315 ~~(Yonenaga et al. 2012)Earlier formulations of lipid based carriers were limited by toxicity and~~  
316 ~~immunogenicity at high lipid concentrations, low bioavailability, and low biodistribution (Zatsepin et~~  
317 ~~al. 2016; Huggins et al. 2019).~~ Nevertheless, the ease of lipid synthesis and structural modifications  
318 permit thorough studies on structure-activity relationships and thus, enable a guided design of more  
319 efficient and safe delivery systems (Zhi et al. 2013). Furthermore, lipid-based carriers can be easily  
320 decorated with receptor ligands to target specific cell types such as tumor and angiogenic endothelial  
321 cells (Yonenaga et al. 2012). ~~(Yonenaga et al. 2012)Such studies culminated in 2018 with the success~~  
322 ~~of Patisiran (ONPATTRO®), a liposomal vector developed by Alnylam Pharmaceuticals, as the first~~  
323 ~~US Food and Drug Administration approved synthetic carrier of siRNA into cells (Adams et al. 2018;~~  
324 ~~Hoy 2018; Wood 2018).~~ (Zhi et al. 2013)

### 325 2.2.3 Chemical Modifications

326 Chemical modifications may impart one or more of the following: in vivo stability, cellular delivery,  
327 reduced immunogenicity, and potency through enhanced target binding affinity (Corey 2007; Judge et  
328 al. 2006; Whitehead et al. 2009). Such modifications may alter the phosphodiester backbone  
329 (phosphothiorates, boranophosphates, and locked nucleic acids), the ribose sugar (2' modifications, 4'  
330 thio), or the base (ribodifluorotoluy nucleotide) (Corey 2007). In particular, 2'-O-modifications on  
331 siRNA impart nuclease resistance (Whitehead et al. 2009) and suppression of sequence-dependent  
332 immunostimulation by some sequences (Judge et al. 2005; 2006). Furthermore, Jackson et al. (Jackson  
333 et al. 2006) showed that by specifically modifying position 2 in the siRNA guide strand, off-target  
334 binding of other transcripts to the seed region is reduced. In addition, uncharged nucleic acid mimics  
335 such as peptide nucleic acids and morpholino oligomers present unique chemical properties and may  
336 improve biodistribution and efficacy. Details on the structure, properties, and applications of  
337 chemically modified nucleic acids and DNA/RNA mimics have been extensively reviewed elsewhere  
338 (Corey 2007; Summerton 2006; Karkare and Bhatnagar 2006; Chery 2016).

### 339 2.2.4 ~~(Yonenaga et al. 2012)(Sakurai et al. 2014)Utility of Inorganic Nanoparticles~~

340 ~~Inorganic nanoparticles are emerging as appealing synthetic vectors for nucleic acid delivery owing to~~  
341 ~~their unique properties such as tunable size and surface properties, multifunctional capabilities,~~  
342 ~~chemical and thermal stability, and low inherent toxicity (Loh et al. 2015; Y. Ding et al. 2014).~~  
343 ~~Incorporating nucleic acid cargo into inorganic nanoparticles can be accomplished using the following~~  
344 ~~general strategies: complexation between negatively charged nucleic acid material and positively~~  
345 ~~charged inorganic nanoparticle, direct conjugation of nucleic acid onto the inorganic particle with a~~

Formatted: Not Highlight

Formatted: Font color: Auto

Formatted: Font color: Auto

Formatted: Not Highlight

Formatted: Font color: Auto

Formatted: Font color: Auto

Formatted: Font color: Auto

Formatted: Font color: Auto, Not Highlight

Formatted: Font color: Auto

Formatted: Font color: Auto

Formatted: Not Highlight

Formatted: Font color: Auto, Not Highlight

Formatted: Not Highlight

Formatted: Font color: Auto, Not Highlight

Formatted: Font color: Auto

Formatted: Font color: Auto, Not Highlight

Formatted: Not Highlight

Formatted: Font color: Auto, Not Highlight

Formatted: Font color: Auto

Formatted: Justified

Formatted: Font color: Auto

Formatted: Font color: Auto



## Virus Structure and Mechanism Inform the Design of Nucleic Acid Delivery Systems

346 [stimuli-responsive linker, and addition of cationic amphiphilic polymer to facilitate the assembly](#)  
347 [formation between the inorganic nanoparticle and the nucleic acid \(Loh et al. 2015\).](#)

348 [Another approach to protect and deliver nucleic acid cargos is via encapsulation using metal-organic](#)  
349 [frameworks \(MOFs\) \(Liang et al. 2015; Tolentino et al. 2020; Li et al. 2019; Poddar et al. 2019\). These](#)  
350 [are porous structures built from metal ions or metal clusters linked by organic ligands \(Li et al. 2019\).](#)  
351 [The nucleic acid can be accommodated in the MOF structure through electrostatic and coordination](#)  
352 [interactions. Such physical confinement and the characteristic positive surface charge of MOFs offer](#)  
353 [effective protection of nucleic acid cargo against enzymatic degradation, which is, in many ways,](#)  
354 [analogous to viral capsids \(Li et al. 2019; Poddar et al. 2019\).](#)

355 [While viruses deliver their nucleic acid cargo mostly through vesical fusion with the aid of some](#)  
356 [membrane fusion proteins \(Harrison 2008\), inorganic nanoparticles do so with more complexity and](#)  
357 [hence present some formidable challenges. To achieve intracellular response, the nucleic acid cargo](#)  
358 [preferably needs to disassemble from the inorganic nanoparticle construct and escape the endosome.](#)  
359 [The mechanism by which these events \(cell internalization and endosomal escape\) occur depends on](#)  
360 [the identity and properties of the inorganic core, chemistry of the conjugation technique utilized, and](#)  
361 [response of other nanoparticle components to cellular or external stimuli \(Sokolova and Epple 2008\).](#)  
362 [For example, magnetic iron oxide \(Fe<sub>3</sub>O<sub>4</sub>\) nanoparticle, when utilized as a delivery vehicle, can be](#)  
363 [stimulated to produce oscillating magnetic fields which could then promote more efficient endocytosis](#)  
364 [\(Fouriki and Dobson 2014\). Furthermore, the inclusion of cell penetrating peptides and cationic](#)  
365 [amphiphilic polymers \(e.g. polyethylenimine\) as transfecting components assists in the endosomal](#)  
366 [escape via membrane destabilization and osmotic swelling, respectively \(Thomas and Klibanov 2003;](#)  
367 [Dowaidar et al. 2017\). On the other hand, biocompatible MOFs like Zeolitic Imidazolate Framework-](#)  
368 [8 \(ZIF-8\) possess a hydrophobic and positively-charged surface \(Zhuang et al. 2014\), which enable](#)  
369 [them to interact with the cell membrane and enable internalization through endocytosis.](#)

370 [A promising use of a metal nanoparticle for nucleic acid delivery is exemplified by spherical nucleic](#)  
371 [acids \(SNAs\). SNAs radially display a high density of nucleic acids around a spherical nanoparticle.](#)  
372 [The introduction of high concentrations of salt masks the polyanionic backbone of the nucleic acids,](#)  
373 [permitting clustering around a very small surface area \(Mirkin et al. 1996; Cutler et al. 2011; Cutler et](#)  
374 [al. 2012\). Moreover, the attachment of nucleic acids to a scaffold enhances their target binding affinity](#)  
375 [to complementary nucleic acids by restricting their conformational flexibility, reducing the entropic](#)  
376 [cost of binding \(Lytton-Jean and Mirkin 2005\). SNAs have low immunogenicity \(Massich et al. 2009\)](#)  
377 [and are readily taken up by cells \(Cutler et al. 2011\) via caveolin-dependent endocytosis \(Choi et al.](#)  
378 [2013\), eliminating the need for potentially toxic transfection agents \(Cutler et al. 2011; Cutler et al.](#)  
379 [2012\). Unlike the abovementioned examples of inorganic nanoparticles, SNAs do not rely on](#)  
380 [complexation nor encapsulation to protect their nucleic acid cargo \(Mirkin et al. 1996; Cutler et al.](#)  
381 [2011; Cutler et al. 2012\). The mechanism by which they protect nucleic acids is discussed more in](#)  
382 [Section 2.2.5.](#)

### 383 **2.2.5 Self-generated Sterics**

385 [The overall 3D architecture of spherical nucleic acids \(SNAs\) imparts nuclease resistance through](#)  
386 [steric-shielding and enhanced local ionic strength \(Seferos et al. 2009\). This sterics-based mechanism](#)  
387 [of nucleic acid protection has defined an entire class of nucleic acid delivery systems. These nucleic](#)  
388 [acid displaying nanomaterials or NADNs, have recently been reviewed by Gudipati and colleagues](#)  
389 [\(2019\). While the metallic gold core provides a means of sensing and tracking the intracellular fate of](#)  
390 [the nanoconstructs \(Mirkin et al. 1996; Cutler et al. 2012\), it has limited therapeutic use. Thus, later](#)

Formatted: Font color: Auto

Formatted: Font color: Auto

Formatted: Not Highlight

Formatted: Font color: Auto, Not Highlight

Formatted: Font color: Auto

Formatted: Not Highlight

Formatted: Font color: Auto

Formatted: Font color: Auto

Formatted: Font color: Auto

Formatted: Font color: Auto

Formatted: Space Before: 0 pt, After: 0 pt

Formatted: Font: Bold

Formatted: Font color: Auto

Formatted: Justified

Formatted: Font color: Auto

Formatted: Font color: Auto

## Virus Structure and Mechanism Inform the Design of Nucleic Acid Delivery Systems

391 generations of SNAs that have been developed contain biocompatible cores such as such proteins  
392 (Brodin et al. 2015; Samanta et al. 2020) and liposomes (Banga et al. 2014).

Formatted: Font color: Auto

393 Designed to build upon the successful properties of SNAs, NADNs utilize densely packed  
394 oligonucleotides around a scaffold, enhancing oligonucleotide stability and permitting scavenger-  
395 mediated endocytosis but are built upon biodegradable core materials. The scaffolds of reported  
396 NADNs are chemically diverse (Rush et al. 2013; Banga et al. 2014; 2017; Awino et al. 2017; Ding et  
397 al. 2018; Roloff et al. 2018; Ruan et al. 2018) and can be programmed for responsiveness to  
398 biochemical stimuli (Awino et al. 2017; Santiana et al. 2017). For example, our lab developed nucleic  
399 acid nanocapsules (NANs) comprised of nucleic acids photochemically tethered to the surface of  
400 stimuli-responsive, crosslinked micelles (Awino et al. 2017; Santiana et al. 2017).

Formatted: Font color: Auto

Formatted: Font color: Auto

401 Overall, this section underscores that virus particles are metastable machines built to protect the viral  
402 genome and that its overall responsiveness to the environment enables it to carry out its function as an  
403 infectious particle. In a similar fashion, nonviral synthetic carriers are designed to protect nucleic acid  
404 cargo and facilitate controlled release. Table 1 provides a summary of the structures and cellular  
405 trafficking of viral and nonviral carriers. Similar to viruses, functional components (as summarized in  
406 Table 2) are incorporated into the design of nonviral vectors that facilitate cellular entry (Section 3),  
407 endosomal escape (Section 4), and nuclear delivery (Section 5).

Formatted: Font color: Auto, Not Highlight

Formatted: Space Before: 6 pt, After: 12 pt

Formatted: Not Highlight

Formatted: Font: Bold, Not Highlight

Formatted: Not Highlight

Formatted: Font: Bold, Not Highlight

Formatted: Not Highlight

Formatted: Font: Font color: Auto

Formatted: Font color: Auto

408 (Gelderblom 1996)(Prasad and Schmid 2011)(Gelderblom 1996)(Y. Pan, Jia, et al. 2012; Y. Pan,  
409 Zhang, et al. 2012)(Yata et al. 2014)(Brandenburg et al. 2005)(Lam and Steinmetz 2019)(Yata et al.  
410 2014)(Lam and Steinmetz 2019)Among various polycationic formulations, polymer-based materials  
411 such as polymeric nanoparticles, dendrimers, polymer micelles, polymersomes, polyplexes, and  
412 lipopolyplexes benefit from their relative design simplicity and potential for multi functionality  
413 (Takemoto et al. 2014; Yuan and Li 2017). The chemistry, molecular weight, amount with respect to  
414 the nucleic acid, and overall topology of the polymer determine its stability and transfection efficiency.  
415 Intracellularly cleavable linkages are typically inserted within the polymeric chain, affording a  
416 dynamic structure that reveals the nucleic acid payload in response to a site specific stimulus (Troiber  
417 and Wagner 2011).

418 Multiblock copolymers impart modularity and enable multifunctionality. As an example, polymeric  
419 carriers are often based on the electrostatic condensation and shielding by a cationic polymer such as  
420 polydimethylaminoethyl methacrylate (pDMAEA). pDMAEA can then be copolymerized with a  
421 second block of P(N (3 (1H imidazol 1 yl)propyl)acrylamide (PImPAA) and poly(butyl acrylate)  
422 (pBA) that mediates an acid triggered endosomal escape. PImPAA and PBA were designed based on  
423 viral membranolytic peptides, and they disrupt the endosomal membrane in synergy through  
424 electrostatic and hydrophobic interactions, respectively (Gillard et al. 2014; Truong et al. 2013). Such  
425 cationic polymer based carriers serve as valuable tools for assessing the potency of nucleic acids under  
426 study. Unfortunately, structural heterogeneity, imprecise surface conjugation, lack of structure-  
427 function insights, and cytotoxicity at therapeutically effective formulations hamper their clinical utility  
428 (Troiber and Wagner 2011; Lv et al. 2006).

### 3 (Moret et al. 2001)(Awino et al. 2017; Santiana et al. 2017)Cellular Targeting, Attachment, 430 and Entry

Formatted: Justified

431 Tropism is the ability of viruses to target specific cell types by binding their surface protein or peptide  
432 ligands to specific host cell receptors. The elaborate means with which they make use of these ligands  
433 accounts for their cell target specificity and high uptake efficiency (Ni et al. 2016). Mechanisms

Formatted: Not Highlight

Formatted: Not Highlight

Formatted: Not Highlight

## Virus Structure and Mechanism Inform the Design of Nucleic Acid Delivery Systems

434 governing the targeting and specific uptake of viruses and nonviral vectors alike rely on the use of  
435 electrostatic forces, multiple receptors for enhanced specificity, and multivalent interactions.

### 436 3.1 Receptor ligands are central to the molecular mechanisms of targeting, attachment, and 437 entry.

438 Prior to entry, viruses often adhere to the cell surface via non-specific electrostatic interactions  
439 involving viral surface components (i.e. membrane glycoproteins) and negatively charged sugars (i.e.  
440 heparin sulfate) attached on the target cell surface (Mazzon and Marsh 2019; Grove and Marsh 2011).  
441 Though such interactions may lack specificity, they provide the virus an initial foothold on the cell  
442 before recruiting specific cell receptors and facilitating entry (Grove and Marsh 2011). Most viruses,  
443 which include influenza virus, coronavirus, reovirus and polyomavirus, utilize the sialic acid receptors  
444 on the host cell surface for initial attachment (Maginnis 2018). Taking inspiration from this virus  
445 behavior, a number of delivery methods have either functionalized nucleic acid cargo with sialic acid  
446 (St-Pierre et al. 2016), or encapsulated them in nanocarriers decorated with sialic acids on the surface  
447 (Q-Tang et al. 2019). A notable example of the latter strategy is demonstrated in the work of Tang and  
448 co-workers (2019). In their study, they have successfully delivered reporter (luciferase) and functional  
449 (antitumor p53) mRNAs to cancer cells using a liposomal nanoparticle containing surface sialic acids.  
450 Other than sialic acids, viruses utilize a plethora of receptor ligands which are proteoglycans (i.e. cell  
451 adhesion molecules) and lipids (i.e. PS) by nature, to mediate cellular attachment and entry (Maginnis  
452 2018). On the other hand, synthetic vectors make use of a more chemically diverse array of ligands but  
453 mostly for targeting purposes.

454 Targeted delivery is desired for synthetic vectors as it confers safety, efficacy, and efficiency. It limits  
455 the release of the therapeutic to diseased cells or tissues, minimizing adverse off-target effects that  
456 could outweigh therapeutic benefits. Secondly, it enhances efficacy by localizing a high concentration  
457 of the drug to a specific site. Third, efficiency is achieved by providing access to sites such as certain  
458 cells or subcellular locations (e.g. nucleus) that are normally inaccessible to the therapeutic (Rohovie  
459 et al. 2017). Many non-viral strategies have derived targeting domains from viral ligands for specific  
460 cell or tissue targeting. For example, the adenovirus-derived RGD peptide has been used to direct the  
461 nucleic acid delivery of lipoplexes, dendriplexes, and polyplexes to tumor cells overexpressing integrin  
462  $\alpha_v\beta_3$  on the cell surface (Danhier et al. 2012). The successful delivery of RGD-conjugated ASOs to  
463 melanoma cells has also been demonstrated (Juliano et al. 2008; Kang et al. 2008; Alam et al. 2008;  
464 Juliano et al. 2011). An (Yonenaga et al. 2012) RGD-based polycationic liposome was also developed  
465 to specifically target cancer cells and angiogenic endothelial cells (Yonenaga et al. 2012).

466 Other ligands of non-viral origin also offer targeting properties. For example, monoclonal antibodies  
467 have been highly effective at targeting delivery of cytotoxic drugs to cancer cells (Sievers et al. 2001;  
468 Younes et al. 2010; Krop et al. 2010). Their ability to specifically and avidly bind to cell-specific  
469 receptors makes them equally viable targeting domains for biologics such as therapeutic nucleic acids.  
470 Their use in directing nucleic acid carriers has been demonstrated in several studies (Moffett et al.  
471 2017; Palanca-Wessels et al. 2011; Ngamcherdtrakul et al. 2015; Huggins et al. 2019; Nanna et al.  
472 2020). They can be either directly conjugated to the nucleic acid (Huggins et al. 2019; Nanna et al.  
473 2020) or to the vector (Moffett et al. 2017; Palanca-Wessels et al. 2011; Ngamcherdtrakul et al. 2015).  
474 Antibody-RNA conjugates (ARCs) are promising in that they overcome possible limitations of  
475 nanoparticle-based formulations such as poor diffusivity, toxicity, and immunogenicity while still  
476 significantly extending the half-life of the cargo (Nanna et al. 2020). Earlier conjugation methods for  
477 therapeutic attachment to antibodies involve nonselective conjugation to lysine or cysteine residues.  
478 Consequently, prior formulations suffer mainly from product heterogeneity (Huggins et al. 2019).

Formatted: Not Highlight

Formatted: Not Highlight

Formatted: Justified

Formatted: Font color: Auto, Not Highlight

Formatted: Not Highlight

Formatted: Font color: Auto, Not Highlight

Formatted: Not Highlight

Formatted: Font color: Auto, Not Highlight

Formatted: Not Highlight

Formatted: Font color: Auto, Not Highlight

Formatted: Not Highlight

Formatted: Font color: Auto, Not Highlight

Formatted: Not Highlight

Formatted: Font color: Auto, Not Highlight

Formatted: Not Highlight

Formatted: Font color: Auto, Not Highlight

Formatted: Not Highlight

Formatted: Font color: Auto, Not Highlight

Formatted: Not Highlight

Formatted: Font color: Auto, Not Highlight

Formatted: Not Highlight

Formatted: Font color: Auto, Not Highlight

Formatted: Not Highlight

Formatted: Font color: Auto, Not Highlight

Formatted: Not Highlight

Formatted: Font color: Auto, Not Highlight

Formatted: Not Highlight

Formatted: Font color: Auto, Not Highlight

Formatted: Not Highlight

Formatted: Font color: Auto, Not Highlight

Formatted: Not Highlight

Formatted: Font color: Auto, Not Highlight

Formatted: Not Highlight

Formatted: Font color: Auto, Not Highlight

Formatted: Not Highlight

Formatted: Font color: Auto, Not Highlight

Formatted: Not Highlight

Formatted: Font color: Auto

Formatted: Not Highlight

Formatted: Not Highlight

Formatted: Not Highlight

Formatted: Not Highlight

## Virus Structure and Mechanism Inform the Design of Nucleic Acid Delivery Systems

479 [Recently published works on ARC synthesis involved highly specific mechanisms for conjugation,](#)  
480 [giving a precise drug:antibody ratio of 2 \(Huggins et al. 2019; Nanna et al. 2020\).](#)

481 [Nucleic acid aptamers offer another promising approach in delivering nucleic acid cargos to specific](#)  
482 [cell-types \(Dassie and Giangrande 2013\). Aptamers are short, chemically synthesized, single stranded](#)  
483 [oligonucleotides \(DNA or RNA\), which adopt a specific three-dimensional \(3D\) structure and bind to](#)  
484 [their ligands with high affinity \( \$K\_D\$ s in the pico- to nano-molar range\) \(Sun et al. 2014\). Although](#)  
485 [aptamer-nucleic acid conjugates possess no innate mechanisms for endosomal escape on their own,](#)  
486 [aptamers can be conjugated on to nucleic acid carriers with endosomal escape activity as a way to](#)  
487 [improve cell specific targeting \(Yan and Levy 2018\). For example, Zhao and co-workers \(2011\)](#)  
488 [designed a nanocomplex composed of a cationic PEI core endosomal escape component, CD30 RNA](#)  
489 [aptamer targeting lymphoma cells and siRNA that inhibits the expression of anaplastic lymphoma](#)  
490 [kinase \(ALK\). Such an assembly was proven to selectively bind lymphoma cells, deliver the siRNA](#)  
491 [intracellularly, silence ALK expression, and arrest the growth of lymphoma cells \(Zhao et al. 2011\).](#)

492 [Lastly, small molecules are commonly used as targeting ligands as they are easily synthesized at a](#)  
493 [modest cost. They are more stable than biological ligands such as aptamers and peptides, and their](#)  
494 [conjugation is often relatively simple. However, these molecules are often not the natural ligands of](#)  
495 [the target cell receptors and thus have lower affinity and specificity for a given receptor, the latter](#)  
496 [giving rise to off-target effects. Nevertheless, the relative structural simplicity and functional](#)  
497 [designability of small molecules make them attractive and viable targeting domains \(Friedman et al.](#)  
498 [2013\).](#)

499 [For example, folate \(Vitamin B9\) is widely used for targeting folate receptor-positive cell lines, with a](#)  
500 [high affinity \( \$K\_D = 1\$  nM\) and minimal toxicity. Folate-functionalized vectors are typically internalized](#)  
501 [via receptor-mediated endocytosis, but reduced folate carriers, though having lower affinity, directly](#)  
502 [enter the cytosol. Folate-expressing imaging agents are currently in Phase I and Phase II clinical trials,](#)  
503 [but they are not yet clinically approved for targeting therapeutic nanoparticles \(Sikorski et al. 2015\).](#)

504 [Likewise, benzamides \(anisamide, in particular\) target sigma receptors that are upregulated in cancer](#)  
505 [cell lines. Benzamide analogues can also target dopamine receptors selectively. So far, these have been](#)  
506 [used to deliver small molecule drugs such as doxorubicin encapsulated in liposomes but have not been](#)  
507 [explored in gene-delivery yet \(Banerjee et al. 2004; Mach et al. 2004\).](#)

### 508 **3.2 Multivalent interactions facilitate cellular uptake.**

509 [Multivalent interactions between the viral ligands and host cell surface receptors not only amplify the](#)  
510 [strength of the interaction but also promote viral entry. This is exemplified by the influenza virus](#)  
511 [where the interaction of multiple capsid protein trimers \(2-4 per 100 nm<sup>2</sup>\) with spatially concentrated](#)  
512 [sialic acid functionalities on the surface of the host cell \(50-200 per 100 nm<sup>2</sup>\) is necessary for effective](#)  
513 [attachment and uptake \(Mammen et al. 1998\). Apart from high surface density, the spatial arrangement](#)  
514 [of the ligands is equally important. For example, the internalization of the simian virus 40 \(SV40\)](#)  
515 [necessitates the pentameric presentation of its viral capsid protein 1 to successfully bind to the cell-](#)  
516 [surface GM1 receptors and facilitate endocytosis \(Ewers et al. 2010\).](#)

517 [This parallels with carbohydrate-based delivery systems such as siRNAs and ASOs conjugated to N-](#)  
518 [acetylgalactosamine \(GalNAc\) for hepatic targeting. GalNAc involves multi-site interactions with](#)  
519 [asialoglycoprotein receptors \(ASGPR\) of hepatocytes, facilitating endocytosis. \(Nair et al. 2014;](#)  
520 [Debacker et al. 2020\). In 2019, Alnylam's givosiran \(GIVLAARI®\) was the first US Food and Drug](#)  
521 [Administration approved GalNAc conjugate for acute hepatic porphyria, and other conjugates are](#)

Formatted: Not Highlight

Formatted: Justified

Formatted: Font color: Auto

Formatted: Not Highlight

Formatted: Font color: Auto

Formatted: Font color: Auto, Not Highlight

## Virus Structure and Mechanism Inform the Design of Nucleic Acid Delivery Systems

522 [underway \(Debacker et al. 2020\)](#), ASPGR is a liver-specific receptor that has been targeted for hepatic-  
523 [directed therapeutics](#). It is a heterooligomeric complex that is capable of interacting with multiple  
524 [GalNAc molecules \(Meier et al. 2000\)](#). The strong binding affinity of monomeric GalNAc with  
525 [ASPGR is in the micromolar range, and the avidity of the interaction can be enhanced by 10<sup>3</sup> to 10<sup>5</sup>](#),  
526 [depending on the number and spacing of GalNAc units \(Lee and Lee 2000\)](#). Specifically, the structure  
527 [of ASPGR was found to optimally bind three divergent GalNAc residues \(Lee and Lee 2000\) spaced](#)  
528 [from a common branch point by 14-20 Å and separated from each other by 15-20 Å \(Lee et al. 1983;](#)  
529 [Khorev et al. 2008\)](#).

530 [Other synthetic vectors having multivalent interactions with cell receptors have been developed to](#)  
531 [mimic viral behavior and have shown an enhanced cellular uptake of the carriers or nucleic cargo. A](#)  
532 [prime example of this is the study of Nakagawa et al. \(2010\), wherein they delivered a splice switching](#)  
533 [antisense oligonucleotide \(SSO\) directly conjugated to anisamide, a sigma receptor present in plasma](#)  
534 [membranes, to tumor cells, and investigated their ability to modify the splicing of a reporter gene](#)  
535 [\(luciferase\). Mono-anisamide and tri-anisamide conjugates were synthesized, and it was demonstrated](#)  
536 [that the multivalent conjugate yielded a more enhanced receptor-specific cell uptake and biological](#)  
537 [effect \(Nakagawa et al. 2010\). Another study highlighting the beneficial effect of multivalency to](#)  
538 [nucleic acid cargo internalization is carried out by Kang et al. \(Y. Y. Kang et al. 2018\). In their study,](#)  
539 [siRNA specific to Bcl2, an anti-apoptotic protein, was tethered to MUC-1- and nucleolin-targeting](#)  
540 [aptamers and delivered to cancer cells. Fluorescence microscopy revealed the positive correlation](#)  
541 [between aptamer valency \(n = 1,3,9\) and cellular internalization. Moreover, higher tumor accumulation](#)  
542 [was observed for multivalent aptamer conjugates compared to mono- and divalent conjugates. These](#)  
543 [studies underscore the critical need for multivalent interactions in designing delivery systems for](#)  
544 [nucleic acids.\(Nair et al. 2014; Debacker et al. 2020\)\(Debacker et al. 2020\)\(Meier et al. 2000\)\(Yuan](#)  
545 [C. Lee and Lee 2000\)\(Yuan C. Lee and Lee 2000\)\(Y. C. Lee et al. 1983; Khorev et al. 2008\)](#)

### 546 **3.3 Attachment to multiple receptors confers cell target specificity and uptake efficiency.**

547 [Maginnis \(2018\) provides a comprehensive review of how virus interactions with host receptors govern](#)  
548 [pathogenicity. Worth noting are evolutionarily conserved mechanisms among viruses, redundancy in](#)  
549 [target primary receptors, and diversity of secondary receptors. One conserved mechanism is the](#)  
550 [conformational change involved in the sequential binding to multiple receptors that leads to fusion or](#)  
551 [endocytosis. For instance, the trimeric glycoprotein \(GP\) complex of the human immunodeficiency](#)  
552 [virus \(HIV\) is formed by the GP120/GP41 heterodimer and is necessary for cellular targeting and entry.](#)  
553 [GP120 binds CD4 on the surface of T-cells, T-cell precursors, macrophages, dendritic cells, and](#)  
554 [microglial cells. GP120 binding induces a conformational shift in the trimeric GP, revealing a GP120](#)  
555 [binding domain specific for one of many chemokine coreceptors such as CXCR4 and CCR5. These](#)  
556 [coreceptors vary across different cells and thus mainly determine tropism \(Fanales-Belasio et al. 2010;](#)  
557 [Wilen, Tilton, and Doms et al. 2012\). The involvement of coreceptors form the basis of some anti-](#)  
558 [viral drugs such as Maraviroc, a US Food and Drug Administration and European Medicines Agency](#)  
559 [approved HIV/AIDS treatment. It acts by antagonizing CCR5, the secondary receptor of HIV in CD4<sup>+</sup>](#)  
560 [T cells. In particular, maraviroc binding induces a change to the inactive conformer of CCR5 \(López-](#)  
561 [Huertas et al. 2017\).](#)

562 [In terms of redundant receptors, integrins are of particular interest because \(Anderson, Owens, and](#)  
563 [Naylor 2013\)\(Z. Wang, Chui, and Ho 2010; Rudy L Juliano et al. 2011\)they are commonly involved](#)  
564 [in the internalization of viruses. Integrins are heterodimeric cell surface receptors that mediate cell](#)  
565 [adhesion, migration, differentiation, and tumor growth. The binding of a virus to a host induces the](#)  
566 [clustering and/or structural changes of integrins, resulting in intracellular cues that enhance binding](#)

Formatted: Font color: Auto

Formatted: Font color: Auto

Formatted: Font color: Auto, Not Highlight

Formatted: Font color: Auto

Formatted: Font color: Auto, Not Highlight

Formatted: Font color: Auto

Formatted: Not Highlight

Formatted: Font color: Auto

Formatted: Font color: Auto

Formatted: Font color: Auto

Formatted: Font color: Auto

Formatted: Not Highlight

Formatted: Font: Not Bold

Formatted: Not Highlight

Formatted: Font: Not Bold

Formatted: Not Highlight

Formatted: Font: Not Bold

Formatted: Not Highlight

Formatted: Not Highlight

Formatted: Not Highlight

Formatted: Not Highlight

Formatted: Justified

Formatted: Not Highlight



## Virus Structure and Mechanism Inform the Design of Nucleic Acid Delivery Systems

567 [affinity, drive structural changes in the cytoskeleton, and/or facilitate uptake. This is demonstrated by](#)  
568 [certain viruses such as the adenovirus whose secondary attachment to integrins initiates intracellular](#)  
569 [signals that ultimately lead to viral uptake \(Stewart and Nemerow 2007\). For the human](#)  
570 [cytomegalovirus, the binding of its glycoproteins to both the epidermal growth factor receptors \(EGFR\)](#)  
571 [and integrin on the host cell brings EGFR and integrins into close proximity, eliciting signaling](#)  
572 [responses that facilitate cellular uptake and nuclear trafficking \(Wang et al. 2005\).](#)

573 [For synthetic vectors, engaging multiple receptors presents an opportunity for programming more](#)  
574 [specific and efficient nucleic acid delivery systems. The use of multiple ligands for enhanced](#)  
575 [specificity and uptake is guided by knowing which receptors are overexpressed in the tissue or region](#)  
576 [of interest. Just as integrins are often implicated in virus entry, they have become popular targets for](#)  
577 [drug and gene delivery for their natural abundance, efficient endocytosis, and differential expression](#)  
578 [on a number of tumor cells and angiogenic endothelial cells \(Wang et al. 2010; Juliano et al. 2011\).](#)  
579 [For instance, Nie et al \(Nie et al. 2011\) developed a synthetic dual-ligand targeted vector in which](#)  
580 [plasmid DNA is condensed by polyethylenimine \(PEI\). In this study, they conjugated PEG-ylated PEI-](#)  
581 [based polyplexes with peptides B6 and arginylglycylaspartic acid \(RGD\) that target transferrin and](#)  
582 [integrin, respectively. This strategy exploits the fact that tumor cells overexpress transferrin while](#)  
583 [vasculature that supply blood to these newly formed tumor cells overexpress integrins. Importantly,](#)  
584 [RGD-integrin binding stabilizes the B6-transferrin interaction. This design has shown to improve](#)  
585 [transfection efficiency and specificity. Thus, as illustrated in \*\*Figure 3\*\*, it demonstrates the power of](#)  
586 [mimicking the dual-receptor internalization of natural viruses such as the adenovirus, herpes simplex](#)  
587 [virus, and SV40 \(Hussein et al. 2015\).](#)

588 [In another study, Dong and colleagues \(2018\) depict the dual targeting ability of RGDK peptide](#)  
589 [sequence. In this particular example, they designed a siRNA/amphiphilic dendrimer complex decorated](#)  
590 [with a dual targeting peptide RGDK. The design of the targeting peptide is such that it protects and](#)  
591 [stabilizes the siRNA-dendrimer complex by electrostatic interaction. Similar to Nie et al.'s study, the](#)  
592 [RGD part binds to target integrin receptors on tumor vasculature while the full length RGDK interacts](#)  
593 [with neuropilin-1 \(Nrp-1\), which is expressed on tumor cells, thereby enhancing cellular uptake.](#)

594 [The high delivery efficiency of viruses is due to the elaborate use of ligands in the form of glycoproteins](#)  
595 [and peptides. Similarly, non-viral nucleic acid carriers employ aptamers, peptides, sugars, small](#)  
596 [molecules, lipids, hydrophobic groups, and antibodies to achieve transfection \(R.L. Juliano 2018; Ni](#)  
597 [et al. 2016\). Beyond cell targeting, these domains are essential for productive attachment, uptake,](#)  
598 [endosomal escape, nuclear targeting, and entry as illustrated in \*\*Figure 2\*\*. This section discusses how](#)  
599 [viral and non-viral vectors alike lock on to their target hosts, become internalized, and control](#)  
600 [intracellular fate through key design components integrated to overcome extra- and intracellular](#)  
601 [barriers of nucleic acid delivery.](#)

### 602 **4 Cytosolic delivery**

603 [For a virus to deliver its genome to the cytosol or nucleus, it needs to penetrate either the cellular](#)  
604 [membrane or a subcellular membrane within the cytoplasm such as the endo-lysosomal membrane.](#)  
605 [This section talks about how viruses and synthetic carriers alike manage to bring their nucleic acid](#)  
606 [cargo into the host cell interior with mechanisms to overcome cellular barriers.](#)

#### 607 **4.1 Direct cytosolic delivery**

608 [Some enveloped viruses such as HIV are able to directly translocate their genome into the cytosol via](#)  
609 [cell membrane fusion. As mentioned in \*\*Section 3.3\*\*, the binding of the HIV glycoprotein to its primary](#)

Formatted: Not Highlight

Formatted: Font: Bold, Not Highlight

Formatted: Not Highlight

Formatted: Justified

Formatted: Not Highlight

Formatted: Font: Bold, Not Highlight

Formatted: Not Highlight

## Virus Structure and Mechanism Inform the Design of Nucleic Acid Delivery Systems

610 receptor drives structural changes within the glycoprotein, facilitating a subsequent interaction with a  
611 coreceptor that then mediates viral entry (Wilén et al. 2012). (Fanales-Belasio et al. 2010) Binding to  
612 two receptors enhances the strength of viral attachment, and for HIV, this allows the N-terminal  
613 fusogenic peptide of GP41 to penetrate the membrane. The heptad repeats of GP41 interact to form a  
614 hairpin loop, facilitating the fusion of the viral and host cellular membranes (Chan et al. 1997; Fanales-  
615 Belasio et al. 2010).

616 For nonviral carriers, a particle can also be designed such that it directly transfects cargo to the cytosol  
617 (Jiang et al. 2015). For instance, Motion et al. (Motion, Nguyen, and Szoka et al. 2012) (Motion,  
618 Nguyen, and Szoka 2012) reported a promising phosphatase-triggered liposome carrier that was  
619 directly inspired by HIV. It incorporates an inactive phosphorylated version of the GP41 peptide that,  
620 when dephosphorylated, shifts to its fusogenic alpha-helical conformer. The phosphorylated form, on  
621 the other hand, has an increased random coil structure that is unable to interact with a lipid membrane.  
622 Since phosphates are overexpressed and secreted by diseased tissues, the fusogenic peptide is activated  
623 in a diseased cell, facilitating fusion with the plasma membrane and targeted cytosolic delivery. Such  
624 system has great potential as a nucleic acid carrier. (Wilén, Tilton, and Doms 2012; Fanales-Belasio  
625 et al. 2010) Additionally, Vickers et al. (Vickers et al. 2011) showed that exogenous miRNA can be  
626 directly delivered to the cytosol of target cells by endogenous high density lipoprotein. This direct  
627 transfection is mediated by scavenger receptor B1 (SR-B1) (Vickers et al. 2011) and has also been  
628 demonstrated for the direct delivery of fluorescently labeled siRNA to SR-B1 expressing tumor cells  
629 (Shahzad et al. 2011).

630 In addition, siRNA (Jiang et al. 2015; 2018) and CRISPR-Cas9 ribonucleoprotein (CRISPR-Cas9-  
631 RNP) (Mout et al. 2017) can be directly transfected across the cell membrane using nanoparticle-  
632 stabilized nanocapsules (NPSCs). Previously shown to mediate the direct cytosolic delivery of small  
633 molecules (Yang et al. 2011) and proteins (R-Tang et al. 2013), NPSCs are formed by assembling a  
634 preformed complex of nucleic acids and arginine-coated nanoparticles on the surface of an oil droplet  
635 (Jiang et al. 2015). The inorganic- and lipid-based hybrid construct efficiently delivered nucleic acid  
636 cargo to the cytosol with an siRNA knockdown efficiency of 90% (Jiang et al. 2015; 2018) and to the  
637 nucleus with a CRISPR-Cas9-RNP gene editing efficiency of 30% (Mout et al. 2017). In vivo assays  
638 of spleen-directed siRNA loaded NPSCs showed good selectivity and immunomodulatory activity,  
639 demonstrating the potential for targeted delivery (Jiang et al. 2018).

### 640 4.2 Endosomal escape

641 Most viruses and synthetic nucleic acid carriers are internalized via endocytosis. While viruses manage  
642 to escape into the cytosol efficiently, synthetic carriers pale in contrast, only having around 1-2%  
643 endosomal release (Gilleron et al. 2013). Thus, endosomal escape is the bottleneck of nucleic acid  
644 delivery and ultimately determines therapeutic efficiency (Gilleron et al. 2013; Shetee et al. 2014;  
645 Selby et al. 2017).

646 While direct fusion with the plasma membrane may seem simpler, endocytosis offers several  
647 advantages – one being evasion of molecular crowding in the cytosol and microtubule-assisted  
648 shuttling to the nucleus or other subcellular locations (Barrow et al. 2013). Furthermore, as endocytosis  
649 is often linked to signaling cascades, the invading particle can influence its intracellular fate by  
650 targeting the appropriate receptor (Marsh and Helenius 2006; Nemerow and Stewart 1999). For  
651 viruses, endocytosis can lower the risk of triggering an immune response because rapid endocytotic  
652 uptake minimizes the exposure of viral immunogenic epitopes to the extracellular milieu (Miyachi et  
653 al. 2009). Importantly, the physical integrity of the viral capsid is responsive to both chemical and

Formatted: Font color: Auto

Formatted: Not Highlight

Formatted: Justified

Formatted: Not Highlight

## Virus Structure and Mechanism Inform the Design of Nucleic Acid Delivery Systems

mechanical stimuli brought about by interactions with the host. This provides a basis for disassembly once the genome has reached its target site (Yamauchi and Greber 2016; Greber 2016). Similarly, endocytosis enables opportunities to embed responsiveness of a nonviral carrier to endolysosomal cues. For these reasons and the overwhelming tendency for nonviral carriers to undergo endocytotic entry, research efforts are more directed towards enhancing endosomal escape efficiency.

### 4.2.1 (Yamauchi and Greber 2016; Urs F. Greber 2016) Cellular cues drive endosomal escape via membrane fusion or penetration.

Staring et al. (2018) provides an excellent discussion of how viruses carry out endosomal escape to avoid degradation or recycling. For their remarkable endosomal escape efficiency, viruses have served as templates for engineering the endosomal escape mechanism of non-viral vectors. A unifying theme is a conformational change in viral structural proteins that drives viral and endo-lysosomal membrane fusion for enveloped viruses or membrane penetration by nonenveloped viruses. These structural rearrangements are triggered by cellular cues such as low pH or acid-dependent proteolytic activity. Such viral proteins or peptides contain ionizable groups such as critical histidine residues whose imidazole groups (pKa~6) are protonated as the pH drops in the endosome. These histidine residues act as pH sensors involved in pH-dependent structural changes of the protein or peptide as observed for the surface protein hemagglutinin (HA) glycoprotein (GP) of the influenza virus. Moreover, they also serve as internal buffers. This “proton sponge” effect leads to endosomal swelling and rupture. For this reason, histidine residues (5-20) are added to peptide domains (such as TAT) of nucleic acid carriers (Lo and Wang 2008). A research study by Meng et al. (Meng et al. 2016) has discussed a multifunctional peptide-based nanocarrier composed of different peptide fragments – a CPP segment (TAT) for cell penetration, an ELMD segment for endo-lysosomal membrane disruption, and stearyl moieties to improve hydrophobicity and cell membrane binding ability of the peptide-DNA complex. For the ELMD segment, six histidine residues were inserted to increase endosomal escape by “proton sponge” effect. All these amino acids were dextrorotatory to protect the DNA/peptide nanocarrier from proteolysis.

#### 4.2.1.1 Membrane fusion

For the endosomal escape of enveloped viruses, the influenza virus is a classic model (Figure 4A). The fusogenic HA has been used or mimicked as an endosomal escape domain. Following endocytosis, the acid-triggered proteolysis induces the conformational change of the viral GP spike. This exposes the hydrophobic subunit HA2 that facilitates the endosomal escape of the ribonucleoprotein contents into the cytosol (Pinto et al. 1992). Specifically, endosomal acidification induces a conformational change in HA that sequesters charged residues glutamate-15 and aspartate-19. This reveals a V-shaped HA conformer with a hydrophobic pocket that penetrates deeply into the endosomal membrane. The enhanced penetration increases the lateral pressure in the hydrophobic pocket and the surface tension at the interface of the viral and endosomal membranes. Altogether, these drive the hemifusion of the two lipid membranes (Han et al. 2001).

Synthetic HA2 analogs have demonstrated improved endosomal escape ability (Ye et al. 2012). Ye et al. (Ye et al. 2012) developed and studied different types of fusogenic peptides (HA2, R8) by conjugating them to gelatin-silica nanoparticles (GSNPs). These GSNPs were used to deliver plasmid DNA and their endosomal escape efficiency was measured and compared. They concluded that the endosomal escape efficiency of TAT-HA2 conjugate was superior as compared to others. Moreover, the concentration of the peptide dictates the extent of its interaction with the membrane. While the peptide domains only engage the membrane electrostatically at low concentrations, pore formation is observed at higher concentrations.

Formatted: Font color: Auto, Not Highlight

Formatted: Justified

Formatted: Not Highlight

Formatted: Heading 4

Formatted: Font: Bold

Formatted: Not Highlight

## Virus Structure and Mechanism Inform the Design of Nucleic Acid Delivery Systems

699 [The endosomal escape of the influenza virus can be largely ascribed to the sequestering of the](#)  
700 [hydrophilic cap of HA to reveal a hydrophobic domain HA2 that then engages the endosomal](#)  
701 [membrane. This mechanism has inspired Lönn et al. \(2016\) to develop endosomal escape domains](#)  
702 [\(EEDS\), which are hydrophobic peptides containing Trp and Phe residues. For EED-TAT-siRNA](#)  
703 [conjugates, the presence of indole and/or phenyl rings at an optimal distance of six PEG units from the](#)  
704 [TAT domain is able to significantly enhance the endosomal escape of siRNA. Additionally, the](#)  
705 [concept of hydrophobic unmasking has also been exhibited by NANs. Amphiphilic surfactant-DNA](#)  
706 [conjugates were constructed to mimic the disassembly products of the nanocapsule. The membrane](#)  
707 [permeating ability of these conjugates \(Hartmann et al. 2018\) suggests that the hydrophobic group](#)  
708 [revealed only after disassembly could facilitate the endosomal escape of the degradation products.](#)

709 [Similarly, pH-sensitive fusogenic liposomes \(Figure 4B\) have been developed to mimic the acid-](#)  
710 [triggered endosomal escape of viruses \(Budker et al. 1996\). Sato et al. described the delivery of siRNA](#)  
711 [for gene silencing using low pH-activatable cationic liposomes \(Sato et al. 2012\). The responsiveness](#)  
712 [to low pH is enabled by using a lipid containing a tertiary amine head group that is almost neutral at](#)  
713 [physiological pH but is cationic at low endosomal pH \(Kogure et al. 2008; Moriguchi et al. 2005; Sato](#)  
714 [et al. 2012\). The lipid also consists of two long linoleyl fatty acid chains, forming cone-shaped](#)  
715 [molecules that further mediate endosomal escape through membrane fusion \(Sato et al. 2012; Sakurai](#)  
716 [et al. 2014\). Because the apparent pK of the ionizable lipid is 6.5, rapid membrane fusion and siRNA](#)  
717 [release is induced in the endosomes before lysosomal degradation occurs \(Sato et al. 2012; Sakurai](#)  
718 [et al. 2014\).](#)

### 719 4.2.1.2 Membrane penetration

720 [Unlike enveloped viruses that possess a lipid envelope capable of fusing with the plasma or endo-](#)  
721 [lysosomal membrane, nonenveloped viruses make use of membranolytic peptides to escape the](#)  
722 [endosome. While membrane penetration is not completely understood, the exact mechanism can range](#)  
723 [from temporary membrane destabilization to pore formation to complete disruption \(Staring, Raaben,](#)  
724 [and Brummelkamp et al. 2018\). The elegance of viral endosomal escape using membranolytic peptides](#)  
725 [is exemplified by the adenovirus. The mechanical stress caused by binding multiple receptors primes](#)  
726 [the shedding of the capsid coat \(Burckhardt et al. 2011a\). This liberates membranolytic viral protein](#)  
727 [VI that then creates small lesions on the plasma membrane. As a response, the host secretes lipid](#)  
728 [hydrolase acid sphingomyelinase that catalyzes ceramide production for membrane repair. The](#)  
729 [increased level of ceramide enhances interaction of protein VI with the endosomal membrane, leading](#)  
730 [to endosomal rupture. This illustrates how the host cell's natural response to membrane damage is](#)  
731 [exploited by a virus for it to escape the limiting vesicle \(Staring et al. 2018\). Moreover, a study by](#)  
732 [Ortega-Esteban and colleagues \(2015\) showed that upon virus maturation, the expansion of the genome](#)  
733 [stiffens virions. As in the case of the adenovirus, the rise in internal pressure renders the capsid more](#)  
734 [susceptible to disruption and, thus, contributes to the overall endosomal escape mechanism and](#)  
735 [eventual uncoating of the virus at the nuclear pore complex \(Ortega-Esteban et al. 2015; Urs F. Greber](#)  
736 [2016\).](#)

737 [Similarly, the Glutamic acid-Alanine-Leucine-Alanine \(GALA\) peptide is a targeting and endosomal](#)  
738 [escape peptide that has been used in siRNA delivery \(Subbarao et al. 1987; Kusumoto et al. 2013;](#)  
739 [2014\). GALA was originally designed to undergo an acid-triggered change from a random coil to a](#)  
740 [membrane-disrupting alpha helical structure \(Subbarao et al. 1987\). Later on it was found to target the](#)  
741 [sialic acid residues on lung endothelium \(Kusumoto et al. 2013\), making it a promising multifunctional](#)  
742 [ligand. On the other hand, KALA is a modified version of GALA with alanine to lysine substitutions](#)  
743 [and reduced glutamic acid content. These features allow DNA condensation, endo-lysosomal](#)  
744 [disruption, and nucleic acid release \(Wyman et al. 1997; Shaheen et al. 2011\). Miura et al. \(2017\)](#)

Formatted: Font: Bold

Field Code Changed

Formatted: Heading 4

Formatted: Not Highlight

## Virus Structure and Mechanism Inform the Design of Nucleic Acid Delivery Systems

performed a complete study of KALA as a fusogenic peptide. They modified the surface of a DNA-encapsulating liposome with KALA peptide sequences. In this study, they found that as compared to the full-length KALA sequence (27 residues), the short-KALA3 peptide (14 residues) was the shortest KALA peptide to form a  $\alpha$ -helical structure at physiological pH. Thus, short-KALA3 can be used to elicit transgene expression (Miura et al. 2017). KALA peptide has also been used before for delivery of siRNA-PEG conjugates (Mok and Park 2008).

### 4.2.2 Small molecules for enhancing endosomal escape efficiency

The fact that fusogenic or membranolytic peptides are often required to gain cytosolic access underscores the necessity for an endosomal escape component in a drug delivery system. This idea has been extended to various small molecules that can be used as tools to cross the endo-lysosomal membrane either through direct conjugation to or co-delivery with the nucleic acid cargo (Gilleron et al. 2015; Osborn et al. 2015; Maxfield 1982; Juliano et al. 2018; Joris et al. 2018; Du Rietz et al. 2020; B. Yang et al. 2015; Wang et al. 2017). For example, cationic amphiphilic drugs (CADS) have been shown to enhance siRNA delivery due to their ability to increase the permeability of the endo-lysosomal membrane (Joris et al. 2018; Du Rietz et al. 2020). On the other hand, oligonucleotide enhancing compounds (OECs) are small molecules covalently linked to siRNAs, ASOs, and single stranded oligonucleotides and have been screened for improved cytosolic and nuclear delivery without an external carrier (Yang et al. 2015; Wang et al. 2017). Through a set of structure-activity experiments, hydrophobic phenyl rings, the presence and relative placement of a tertiary amine, and carbamate modifications were identified as essential and tunable features for enhancing the therapeutic availability of the oligonucleotides. How OECs influence the intracellular redistribution of oligonucleotides is not yet clear but, similar to CADs, involves an increase in endomembrane permeability rather than complete disruption. Though the potency imparted by OECs holds great promise, the challenge of enhancing efficacy while minimizing cytotoxicity remains (Juliano et al. 2018).

Additionally, Orellana et al. (2019) reported the use of nigericin, a novel, small molecule endosomal escape agent, to enhance the cytosolic delivery of folate-conjugated miRNA. Nigericin is a proton ionophore that exchanges osmotically inactive protons inside the endosomes with potassium ions in the cytosol. The combined high concentration of sodium and potassium ions raises the osmotic pressure inside the endosomes, resulting in endosomal rupture and release of the miRNA payload.

### 4.2.3 (Meng et al. 2016)(Han et al. 2001)(Ye et al. 2012)(Ye et al. 2012)(Miura et al. 2017)(Mok and Park 2008)(Pinto, Holsinger, and Lamb 1992) Intracellular receptor targeting as a potential endosomal escape strategy

For effective host cell infection, the Lassa virus (Jae et al. 2014), and ebolavirus (EBOV, Carette et al. 2011; Côté et al. 2011; Han-Wang et al. 2016), escape the endosome via a critical switch from their extracellular receptor (involved in cellular attachment and entry) to an intracellular endo-lysosomal receptor to mediate membrane fusion (Jae and Brummelkamp 2015). This is commonly due to the pH drop in the endosome (Jae et al. 2014) that primes the viral glycoprotein (GP) for a receptor switch (Staring, Raaben, and Brummelkamp et al. 2018).

In particular, LASV was found to bind mainly to  $\alpha$ -dystroglycan (Cao et al. 1998), as well as TAM receptor Tyr kinases, DC-SIGN of dendritic cells, and C-type lectins of liver and lymph nodes (Shimajima et al. 2012), and is taken up mainly through macropinocytosis (Oppliger et al. 2016). The trimeric LASV spike protein is composed of a receptor-binding domain (GP1), a fusion protein subunit (GP2), and a unique stable signal peptide (SSP) (Burri et al. 2012), that directs the polypeptide to the

Formatted: Not Highlight

Formatted: Not Highlight

Formatted: Not Highlight

Formatted: Justified

Formatted: Not Highlight

Formatted: Justified

Field Code Changed

Formatted: Font color: Auto

Formatted: Font color: Auto

Formatted: Font color: Auto

Formatted: Font color: Auto

Formatted: Not Highlight

Formatted: Font color: Auto

Formatted: Font color: Auto

Formatted: Not Highlight

Formatted: Font color: Auto



## Virus Structure and Mechanism Inform the Design of Nucleic Acid Delivery Systems

789 endoplasmic reticulum and also interacts with GP2 during membrane fusion (Nunberg and York 2012).  
790 Structural studies support an entry model wherein endo-lysosomal pH (5.0-6.0) induces a  
791 conformational change in GP1 that facilitates an intracellular receptor switch to LAMP1, a late  
792 endosomal/lysosomal protein (Cohen-Dvashi et al. 2015; S-Li et al. 2016). Further acidification in the  
793 lysosomes (pH 4.0) sheds GP1, exposing GP2 that mediates membrane fusion (S-Li et al. 2016). The  
794 pH-dependence of the conformational change is attributed to the pH-sensing His triad on the surface  
795 of the spike protein (Cohen-Dvashi et al. 2015; 2016). Mutation of these His residues reveals that  
796 LAMP1 binding is not necessary for membrane fusion but greatly enhances viral infection efficiency  
797 (Cohen-Dvashi et al. 2016).

798 Similarly, attachment of EBOV to the host cell membrane facilitates internalization principally through  
799 macropinocytosis (Nanbo et al. 2010), with evidence that the virus is also taken up via clathrin-  
800 mediated endocytosis (Aleksandrowicz et al. 2011). Several cell membrane contact sites have been  
801 identified that seem to facilitate virus attachment such as  $\beta$ 1-integrins and Tyro3 (TAM) family kinase  
802 receptors, but no sites for direct interaction with the EBOV GP have been identified yet. C-type lectins  
803 (L-SIGN, DC-SIGN, and hMGL) have also been shown to enhance adherence of the virus to the host  
804 cell membrane. Due to the broad tropism of EBOV across different cell types and different host  
805 organisms, it has been difficult to identify cell surface receptors that facilitate internalization (Hunt,  
806 Lennemann, and Maury 2012). So far, TIM-1 was determined to be the EBOV receptor for epithelial  
807 cells (Kondratowicz et al. 2011). Upon entry, endo-lysosomal acidification activates proteases  
808 cathepsin B and cathepsin L that cleave the EBOV GP. Proteolysis reveals the active conformer GP2,  
809 which then binds to Niemann-Pick C1 (NPC1), a cholesterol transporter embedded on the endo-  
810 lysosomal membrane. This interaction facilitates the fusion of the viral and lysosomal membranes,  
811 releasing the viral nucleocapsid into the cytosol (Carette et al. 2011).

812 Because NPC1 is involved in vesicular trafficking, it is even more interesting that it is responsible for  
813 limiting lipid nanoparticle-mediated siRNA delivery by shuttling the bulk of the lipid nanoparticles  
814 back to the outside of the cell after endocytosis (Sahay et al. 2013). Moreover, inhibition of NPC1  
815 greatly increases the cytosolic delivery of the siRNA cargo (Wang et al. 2016). A similar effect was  
816 observed when ESCRT-1, another endo-lysosomal protein involved in vesicular sorting, was knocked  
817 down to enhance the delivery of a therapeutic anti-miRNA (Wagenaar et al. 2015). Alternatively, the  
818 entrapment of oligonucleotides in the late endosomes can be exploited. Instead of inhibiting or  
819 knocking down endo-lysosomal-associated proteins such as NPC1, LAMP1, or ESCRT-1, a ligand that  
820 engages the intracellular receptor can be used to facilitate the cytosolic delivery of the cargo. This  
821 could potentially be applicable to lipid-based systems where membrane fusion precedes content  
822 release.

### 823 5 Nuclear Delivery

824 Unlike cytoplasmic viruses, nuclear viruses (such as SV40, adenovirus, influenza virus and HIV) need  
825 to travel further in order to replicate themselves in the nucleus of the host cell. They must cross a total  
826 of three cell barriers to reach the nucleus – the plasma membrane, cytosol and the nuclear membrane.  
827 Thus, they have evolved to use their structural features along with cellular transport machinery to hijack  
828 the well-protected nuclear import process. The size, structure, and composition of the viral proteins  
829 determines the mechanism by which it enters the nucleus. The structure and surface properties of  
830 nuclear viruses are also different from cytoplasmic viruses as the capsid of these viruses needs to be  
831 intact when they are traversing through the highly crowded cytosol but should breakdown in the  
832 perinuclear area (Cohen et al. 2011; Kobiler et al. 2012).

Formatted: Font color: Auto

Formatted: Not Highlight

Formatted: Font color: Auto

Formatted: Not Highlight

Formatted: Not Highlight

Formatted: Justified

Formatted: Not Highlight

Formatted: Font color: Auto

Formatted: Font color: Auto



## Virus Structure and Mechanism Inform the Design of Nucleic Acid Delivery Systems

877 nucleus. If cells are undergoing proliferation due to injury, the addition of DTS/NLS sequence shows  
878 limited effect in gene expression as the guard of the nuclear envelope breaks down (Miller and Dean  
879 2009). So far, DTS expressing plasmids have been delivered by electroporation or direct injection.  
880 Thus, it is possible to use DTS as a targeting ligand for gene vectors but not *in vivo*. In addition,  
881 plasmids complexed with proteins like HMG-1, histone H2B proteins, karyopherin receptors, and  
882 nucleoplasmin show increased transgene expression due to nuclear uptake (Miller and Dean 2009).

### 883 5.2 Microtubule-assisted transport

884 Many viruses use microtubule (MT) facilitated transport to traverse the cytoplasmic medium. Viral  
885 proteins induce rearrangement of microfilaments and recruit molecular motors such as dynein and  
886 kinesin to traverse from the plus to the minus terminal of MTs (Döhner, et al, 2005). The MT-organizing  
887 center nucleates the minus end of the MTs and is close to the nucleus. This is how the viral capsid is  
888 transported actively to reach nearby regions of the nucleus (Naghavi and Walsh 2017). Viruses such  
889 as the adenovirus, adeno-associated virus (AAV), and influenza A virus are able to hijack the cellular  
890 microtubule transport system, intercepting traffic to the nucleus. Amongst these, the adenovirus and  
891 influenza A virus are released out of the endosome before traveling along the microtubule in a non-  
892 vesicle dependent manner. In contrast, AAV is transported while within the endosome and the  
893 endosomal vesicle ruptures near the nucleus. The ligands that attach the endosomal membrane to the  
894 MT system are still currently unknown (Cohen et al, 2011).

895 In an effort to mimic viruses, the dynein binding protein (DBP) is often used as a ligand for nuclear  
896 uptake as it can mediate the transport of cargo via the MT-assisted pathway (Favaro et al. 2014; Favaro  
897 et al. 2018). A review by Midoux et al. 2017 (2017) has listed the dynein binding viral proteins and  
898 selective peptide sequences that have been used for efficient nonviral gene delivery. These peptides  
899 help to actively deliver the nanovector to the centrosome wherein the dynein interacts dynamically  
900 with the nuclear envelope and rearranges the nuclear lamin protein filaments, thereby increasing the  
901 permeability of nucleus (Dalmau-Mena et al. 2018). Moreover, Cohen and Granek (2014) provided  
902 theoretical insights on the rational design of spherical nanocarriers that require active transport to the  
903 nucleus. One recent example using such pathway is a peptide vector synthesized by Favaro et al. 2018  
904 (M. T. de P. Favaro et al., 2018). In this study, a dynein binding protein (TRp3) was incorporated into  
905 the vector to enhance microtubule-assisted delivery of an encapsulated gene towards the nucleus of the  
906 cell (Figure 6).

(S. Cohen, Au, and Panté 2011)

### 908 2 — The dynamic structure of a nucleic acid carrier enables genome protection and controlled 909 release.

910 An ideal carrier needs to find a balance between nucleic acid protection and release, two seemingly  
911 contradictory functions (Figure 1). A dynamic structure that responds to site specific cues such as low  
912 pH, enzymatic activity, redox potential, high concentrations of ATP, or changes in pressure can help  
913 control the release of nucleic acid cargo. These cues can vary with microenvironments within a cell,  
914 enabling a biochemically-controlled release. Alternatively, the vector can be made sensitive to external  
915 stimuli such as heat, light, or a magnetic field, which is more applicable to locally delivered  
916 formulations (Takemoto et al. 2014).

### 917 2.1 — Viruses and Capsid Metastability

Formatted: Font: Italic, Font color: Auto

Formatted: Font color: Auto

Formatted: Font color: Auto

Formatted: Justified

Formatted: Font color: Auto, Not Highlight

Formatted: Font color: Auto

Formatted: Not Highlight

Formatted: Font color: Auto

Formatted: Font color: Auto, Not Highlight

Formatted: Font color: Auto

Formatted: Font color: Auto, Not Highlight

Formatted: Font color: Auto

Formatted: Font color: Auto, Not Highlight

Formatted: Font color: Auto

Formatted: Font color: Auto, Not Highlight

Formatted: Font color: Auto

Formatted: Not Highlight

Formatted: Font color: Auto

Formatted: Font color: Auto, Not Highlight

Formatted: Font color: Auto

Formatted: Font color: Auto, Not Highlight

Formatted: Font color: Auto

Formatted: Font color: Auto

Formatted: Font color: Auto, Not Highlight

Formatted: Font color: Auto

Formatted: Font color: Auto

Formatted: Font color: Auto

Formatted: Font color: Auto

Formatted: Indent: Left: 0.75", Hanging: 0.25", Space After: 12 pt

Formatted: Justified

Formatted: Font: Not Bold

Formatted: Normal, Justified, Space Before: 12 pt

## Virus Structure and Mechanism Inform the Design of Nucleic Acid Delivery Systems

918 For viruses, this is achieved by the viral capsid—the protein coat that wraps around the viral genome.  
919 Its metastable nature provides protection and facilitates controlled release. Enveloped viruses possess  
920 an outer lipid envelope that provides additional encapsulation and can fuse with the host plasma  
921 membrane during uptake or endosomal escape (Flint et al. 2015). The viral capsid is composed of  
922 identical self-assembling monomeric units that are stabilized by nonspecific noncovalent interactions.  
923 The physical integrity of the capsid is responsive to both chemical and mechanical stimuli brought  
924 about by interactions with the host. This provides a basis for disassembly once the genome has reached  
925 its target site. For example, bacteriophages, the adenovirus (AdV), and the herpes simplex virus (HSV-  
926 1) release their genome following an increase in internal pressure in response to motor proteins or virus  
927 maturation (Greber 2016; Yamauchi and Greber 2016). For viruses, this is achieved by the viral capsid  
928 —the protein coat that wraps around the viral genome. Its metastable nature provides protection and  
929 facilitates controlled release. Enveloped viruses possess an outer lipid envelope that provides  
930 additional encapsulation and can fuse with the host plasma membrane during uptake or endosomal  
931 escape (Flint et al. 2015). The viral capsid is composed of identical self-assembling monomeric units  
932 that are stabilized by nonspecific noncovalent interactions. The physical integrity of the capsid is  
933 responsive to both chemical and mechanical stimuli brought about by interactions with the host. This  
934 provides a basis for disassembly once the genome has reached its target site. For example,  
935 bacteriophages, the adenovirus (AdV), and the herpes simplex virus (HSV-1) release their genome  
936 following an increase in internal pressure in response to motor proteins or virus maturation (Greber  
937 2016; Yamauchi and Greber 2016).

Formatted: Font color: Auto

938 Viruses have been used mainly for vaccine development and gene therapy. Roldão et al (Roldão et al.  
939 2017) provides an extensive discussion of virus principles and applications in biotechnology. While  
940 viruses are historically produced and extracted from the natural hosts themselves, nowadays they are  
941 primarily produced through various cell cultures. Recombinant versions with attenuated or inactivated  
942 antigens can also be reconstructed from complementary DNA (cDNA) of a viral genome.

Formatted: Indent: First line: 0"

### 943 2.2 Virus-like Particles (VLPs)

Formatted: Font: Not Bold

944 VLPs are non-infectious, multiprotein complexes that mimic the viral capsid assembly but are devoid  
945 of the genome. Their utility as experimental tools and as therapeutic carriers have been thoroughly  
946 reviewed elsewhere (Roldão et al. 2017; Rohovic, Nagasawa, and Swartz 2017). While they are most  
947 commonly expressed in yeast cells due to relative ease of protein expression, relatively low production  
948 cost, and scalability, the use of mammalian and non-mammalian cells, baculoviruses, and bacteria has  
949 been reported (Roldão et al. 2017). Like viruses, VLPs have been successfully used in developing  
950 vaccines and vaccine adjuvants and their utility in gene, miRNA, mRNA, and siRNA delivery has also  
951 been explored (Roldão et al. 2017; Rohovic, Nagasawa, and Swartz 2017). Those that have shown  
952 potential for nucleic acid delivery include bacteriophage-based MS2, animal virus-based hepatitis B  
953 virus core (HBVc), and plant-based cowpea chlorotic mottle virus (CCMV). Target specificity can be  
954 tailored by chemical conjugation of or directly expressing targeting ligands on the protein coat  
955 (Rohovic, Nagasawa, and Swartz 2017).

Formatted: Justified

Formatted: Font: Font color: Auto

956 While the ability of viruses and VLPs to efficiently encapsulate and transfect nucleic acids is  
957 remarkable, they are structurally more complex and, thus, typically require hosts for production and  
958 subsequent purification (Roldão et al. 2017), both of which may come at a high cost. Moreover, VLPs  
959 have a higher risk of triggering an immune response (Xue et al. 2015) and possess limited chemistry  
960 (Wagner 2012). Therefore, tuning properties such as target specificity, particle stability, and  
961 subcellular localization is restricted, motivating the construct of non-viral vectors (Wagner 2012). To  
962 stabilize the nucleic acid cargo, such non-viral delivery agents employ one or more strategies including

## Virus Structure and Mechanism Inform the Design of Nucleic Acid Delivery Systems

963 chemical modifications, conjugation to amphiphilic groups, complex formation, encapsulation (Zhu  
964 and Mahato 2010)(Zhu and Mahato 2010), and self-generated sterics (Gudipati et al. 2019)(Gudipati  
965 et al. 2019).

### 966 2.3 Chemical Modifications and Conjugations

967 Chemical modifications and conjugation strategies may impart one or more of the following: in vivo  
968 stability, target specificity, cellular delivery, and potency through enhanced target binding affinity.  
969 Chemical modifications offer the least drastic change to the therapeutic, and the delivery of chemically  
970 modified free ASOs have been demonstrated. Such modifications may alter the phosphodiester  
971 backbone (phosphothiorates, boranophosphates, and locked nucleic acids), the ribose sugar (2'  
972 modifications, 4' thio), or the base (ribodifluorotoluyl nucleotide) (Corey 2007). Uncharged nucleic  
973 acid mimics such as peptide nucleic acids (PNAs) and morpholino oligomers present unique chemical  
974 properties and may improve biodistribution and efficacy. Details on the structure, properties, and  
975 applications of chemically modified nucleic acids and DNA/RNA mimics have been extensively  
976 reviewed elsewhere (Corey 2007; Summerton 2006; Karkare and Bhatnagar 2006; Chery 2016).

### 977 2.4 Cationic Materials and Polyethylene Glycol (PEG)

978 Viral assembly mainly involves electrostatic interactions between the capsid proteins and the genomic  
979 cargo. Similarly, many first-generation designs of delivery agents relied on the electrostatic masking  
980 of the polyanionic backbone of nucleic acids for successful delivery into cells. This is achieved by  
981 using cationic materials such as natural or synthetic polymers, dendrimers, proteins, peptides, and  
982 cationic lipids (Ni et al. 2016). Electrostatic interactions also strengthen viral attachment to the surface  
983 of the negatively charged host cells. Thus, viruses such as the hepatitis C virus (HCV)(Penin et al.  
984 2001) and influenza virus (IV)(Arinaminpathy and Grenfell 2010) have conserved cationic regions in  
985 their glycoproteins that aid in membrane binding. In the same light, synthetic polycationic nucleic acid  
986 carriers not only allow compaction and protection from nuclease degradation but they also mediate  
987 cellular attachment and entry (Mishiek and Baldeschwieler 1996). However, this uptake mechanism is  
988 nonspecific, and polymeric materials tend to form aggregates with components of the blood such as  
989 serum proteins. For this reason, nonionic, hydrophilic polymers such as PEG are commonly added to  
990 confer stealth. Additionally, the structural flexibility of PEG makes its integration into different  
991 formulations very convenient. However, while PEGylation imparts blood compatibility and  
992 circulation longevity, it can compromise cellular uptake and/or endosomal escape (Takemoto et al.  
993 2014).

994 To address this limitation, PEGylation typically involves responsive linkages that can be cleaved by  
995 cellular cues such as low pH or external stimuli such as temperature (Takemoto et al. 2014). An  
996 alternative way of using cleavable PEG was demonstrated by Li and co-workers (Li et al. 2013)(Li et  
997 al. 2013) where they used MMP-7 cleavable peptides as linkers. Matrix metalloproteinase 7 (MMP-  
998 7) belongs to a class of zinc-dependent, extracellular proteases that are overexpressed on the surface  
999 of breast tumor cells. In their construct, the outer surface of the polymer-based siRNA delivery vector  
1000 was decorated with PEG attached to the core of the particle using a peptide substrate of MMP-7. When  
1001 the peptide substrate comes in contact with MMP-7, the PEG outer layer is cleaved off, revealing a  
1002 highly cationic dimethylaminoethyl methacrylate (DMAEMA) core that then engages the membrane,  
1003 facilitating uptake. Thus, the selective attachment and entry of the resulting construct is afforded  
1004 through proximity activation by MMP-7.

### 1005 2.5 Peptide-based Vectors

Formatted: Font: Not Bold

Formatted: Justified

Formatted: Font color: Auto

Formatted: Font: Not Bold

Formatted: Justified

Formatted: Font color: Auto

Formatted: Font: Not Bold

Formatted: Justified



## Virus Structure and Mechanism Inform the Design of Nucleic Acid Delivery Systems

1006 Peptide based vectors come in several forms such as self assembling peptides and hybrid peptides.  
1007 Cationic amphiphilic peptides are self assembling peptides which consist of a hydrophobic and a  
1008 hydrophilic domain, and they co-assemble into a well defined nanoparticle (Kang et al. 2019). The  
1009 hydrophobic region consists of non-polar neutral amino acids whereas the hydrophilic region has polar  
1010 aliphatic residues. These peptides self assemble to form a micellular structure. Small molecule drugs  
1011 and DNA can be co-delivered using these multifunctional micelle plexes, where each peptide plays a  
1012 different role. For example, displaying a cell penetrating peptide (CPP) on the surface facilitates  
1013 binding and entry. His residues cause endosomal escape while Lys residues condense the DNA. These  
1014 types of complexes have been used to deliver siRNA and plasmid-DNA. Recent studies have also  
1015 shown that the addition of stearyl, an alkyl chain, or cholesterol to the hydrophobic domain of self-  
1016 assembled peptides further enhances DNA condensation and transfection efficiency (Kang et al.  
1017 2019)(Kang et al. 2019).

Formatted: Font color: Auto

1018 On the other hand, highly branched polypeptides are used as hybrid peptide based gene delivery  
1019 vehicles. This is achieved by covalently joining the multi-functional peptide sequences. The functional  
1020 peptides are separated by spacers such as repeats of glycine residues that confer flexibility. Nucleic  
1021 acids are also packed by condensation. Redox active disulfide bonds can be used to connect peptides  
1022 in a branched fashion, delivering genes more efficiently than linear counterparts. These disulfide bonds  
1023 are then reduced in the cytoplasm by glutathione (GSH) to liberate the nucleic acid cargo as well as to  
1024 reduce the cytotoxicity. On the other hand, highly branched arginine rich polypeptides are multivalent  
1025 and flexible—attributes beneficial for nucleic acid compaction and cellular entry. In summary, these  
1026 reducible multibranch cationic polypeptides have the potential to be non-toxic, degradable vectors  
1027 for gene delivery (Kang et al. 2019)(Kang et al. 2019).

### 1028 2.6 Polymer based Vectors

Formatted: Font: Not Bold

Formatted: Justified

Formatted: Font color: Auto

1029 Among various polycationic formulations, polymer based materials such as polymeric nanoparticles,  
1030 dendrimers, polymer micelles, polymersomes, polyplexes, and lipopolyplexes benefit from their  
1031 relative design simplicity and potential for multi-functionality (Takemoto et al. 2014; Yuan and Li  
1032 2017). The chemistry, molecular weight, amount with respect to the nucleic acid, and overall topology  
1033 of the polymer determine its stability and transfection efficiency. Intracellularly cleavable linkages are  
1034 typically inserted within the polymeric chain, affording a dynamic structure that reveals the nucleic  
1035 acid payload in response to a site specific stimulus (Troiber and Wagner 2011).

1036 Multiblock copolymers impart modularity and enable multifunctionality. As an example, polymeric  
1037 carriers are often based on the electrostatic condensation and shielding by a cationic polymer such as  
1038 polydimethylaminoethyl methacrylate (pDMAEA). pDMAEA can then be copolymerized with a  
1039 second block of P(N-(3-(1H-imidazol-1-yl)propyl)acrylamide (PImpAA) and poly(butyl acrylate)  
1040 (pBA) that mediates an acid triggered endosomal escape. PImpAA and PBA were designed based on  
1041 viral membranolytic peptides, and they disrupt the endosomal membrane in synergy through  
1042 electrostatic and hydrophobic interactions, respectively (Gillard et al. 2014; Truong et al. 2013). Such  
1043 cationic polymer based carriers serve as valuable tools for assessing the potency of nucleic acids under  
1044 study. Unfortunately, structural heterogeneity, imprecise surface conjugation, lack of structure-  
1045 function insights, and cytotoxicity at therapeutically effective formulations hamper their clinical utility  
1046 (Gudipati et al. 2019; Troiber and Wagner 2011; Lv et al. 2006).Multiblock copolymers impart  
1047 modularity and enable multifunctionality. As an example, polymeric carriers are often based on the  
1048 electrostatic condensation and shielding by a cationic polymer such as polydimethylaminoethyl  
1049 methacrylate (pDMAEA). pDMAEA can then be copolymerized with a second block of P(N-(3-(1H-  
1050 imidazol-1-yl)propyl)acrylamide (PImpAA) and poly(butyl acrylate) (pBA) that mediates an acid-

## Virus Structure and Mechanism Inform the Design of Nucleic Acid Delivery Systems

1051 triggered endosomal escape. PImPAA and PBA were designed based on viral membranolytic peptides,  
1052 and they disrupt the endosomal membrane in synergy through electrostatic and hydrophobic  
1053 interactions, respectively (Gillard et al. 2014; Truong et al. 2013). Such cationic polymer-based  
1054 carriers serve as valuable tools for assessing the potency of nucleic acids under study. Unfortunately,  
1055 structural heterogeneity, imprecise surface conjugation, lack of structure-function insights, and  
1056 cytotoxicity at therapeutically effective formulations hamper their clinical utility (Gudipati et al. 2019;  
1057 Troiber and Wagner 2011; Lv et al. 2006).

### 1058 2.7 Lipid-based Vectors

1059 For this reason, lipid-based vectors such as liposomes and solid lipid nanoparticles (SLNPs) have been  
1060 explored as nucleic acid carriers (Barba et al. 2019). Compared to other nucleic acid delivery systems,  
1061 lipid-based carriers offer ease of manufacture and scalability. Their lipid formulation mimics the lipid  
1062 bilayer, imparting biocompatibility and conveniently facilitating cellular uptake. Moreover, not only  
1063 can lipid-based vectors be tuned for stability and target specificity, but their components are usually  
1064 not biodegradable (Ghasemiyeh and Mohammadi-Samani 2018).

1065 Among these, liposomes have shown the most promise (Barba et al. 2019). They are spherical vesicles  
1066 made of a lipid bilayer with an aqueous core (Barba et al. 2019; Kulkarni, Cullis, and van der Meel  
1067 2018) and can be designed to carry both hydrophilic and lipophilic cargo (Barba et al. 2019;  
1068 Ghasemiyeh and Mohammadi-Samani 2018). Modular release usually centers on the lipid formulation  
1069 where the lipid envelope is destabilized either by low endosomal pH or by an external stimulus such  
1070 as temperature. Phospholipids such as phosphatidylethanolamine (PE) and phosphatidylcholine (PC)  
1071 undergo an acid-triggered conformational change that disrupts lipid assembly, facilitating cargo  
1072 release. On the other hand, (Yatvin et al. 1978) On the other hand, thermoresponsiveness can be (Kono  
1073 et al. 2010; Abri Aghdam et al. 2019)(Matsumura and Maeda 1986; Maruyama et al. 1993; Gaber et  
1074 al. 1995; Tomita et al. 1989; Anyarambhatla and Needham 1999; Needham et al. 2000)(Anyarambhatla  
1075 and Needham 1999)(Needham et al. 2000)(Needham et al. 2000)(Kono et al. 2010) achieved by heating  
1076 a diseased tissue at the melting-phase transition temperature of the lipid bilayer (41–42°C), inducing  
1077 cargo release. Tissue or cell-targeting specificity has been achieved with the use of antibodies (Mallick  
1078 and Choi 2014)(Abri Aghdam et al. 2019).

1079 In 2018, Patisiran (ONPATPRO™), a liposomal vector developed by Alnylam Pharmaceuticals,  
1080 became the first US Food and Drug Administration (FDA) approved synthetic carrier of siRNA into  
1081 cells (Adams et al. 2018; Hoy 2018; Wood 2018)(Adams et al. 2018; Hoy 2018; Wood 2018). Despite  
1082 their advantages over other nucleic acid carriers, lipid-based carriers, especially the earlier  
1083 formulations, are limited by toxicity, immunogenicity at high lipid concentrations, and low  
1084 bioavailability and biodistribution (Zatsepin et al. 2016; Huggins et al. 2019)(Zatsepin et al. 2016;  
1085 Huggins et al. 2019). For this reason, the clinical translation of small interfering RNAs commenced  
1086 more than a decade after the discovery (Fire et al. 1998) and mechanistic understanding of RNAi as a  
1087 tool to probe gene function (Hannon 2002) and as an endogenous process that facilitates gene  
1088 regulation (Setten et al. 2019)(Setten et al. 2019). Furthermore, other liposome formulations such as  
1089 Doxil and Myocet have only been approved for small molecule delivery (e.g. chemotherapeutic agents  
1090 like Doxorubicin) and are intended to cause cytotoxicity in diseased cells (Mallick and Choi 2014).

### 1091 2.8 Inorganic Nanoparticles

1092 Recently, inorganic nanoparticles are emerging as appealing synthetic vectors for nucleic acid delivery,  
1093 owing to their unique properties such as tunable size and surface properties, multifunctional  
1094 capabilities, chemical and thermal stability, and low inherent toxicity (Loh et al. 2015; Y. Ding et al.

Formatted: Font: Not Bold

Formatted: Justified

Formatted: Font color: Auto

Formatted: Font: Not Bold

Formatted: Justified

Formatted: Font color: Auto

## Virus Structure and Mechanism Inform the Design of Nucleic Acid Delivery Systems

2014). Incorporating nucleic acid cargos into inorganic nanoparticles can be generally accomplished using the following strategies: complexation between negatively charged nucleic acid material and positively charged inorganic nanoparticle, direct conjugation of nucleic acid onto the inorganic particle with a stimuli-responsive linker, and addition of cationic amphiphilic polymer to facilitate the assembly formation between the inorganic nanoparticle and the nucleic acid (Loh et al. 2015). The electrostatic interaction of the negatively charged phosphate backbone of the nucleic acid with either a positively charged inorganic nanoparticle or cationic amphiphilic polymer provides protection from nuclease degradation (Thomas and Klibanov 2003; Moret et al. 2001; Ferrari et al. 1999). (Feng et al. 2015)(Yen et al. 2018)The electrostatic interaction of the negatively charged phosphate backbone of the nucleic acid with either a positively charged inorganic nanoparticle or cationic amphiphilic polymer provides protection from nuclease degradation (Thomas and Klibanov 2003).

Another approach to protect and deliver nucleic acid cargos is via encapsulation using metal-organic frameworks (MOFs)(Liang et al. 2015; Tolentino et al. 2020; Y. Li et al. 2019; Poddar et al. 2019). These are porous structures built from metal or metal clusters linked by organic ligands (Li et al. 2019)(Li et al. 2019). The nucleic acid material can be accommodated in the MOF structure through electrostatic and coordination interactions. Such physical confinement and the characteristic positive surface charge of MOFs offer effective protection of nucleic acid cargo against enzymatic degradation. Importantly, MOFs can hold larger cargo (e.g. pDNA) and higher nucleic acid concentrations compared to micelles and liposomes (Li et al. 2019; Poddar et al. 2019)(Li et al. 2019; Poddar et al. 2019).

(Harrison 2008)To achieve intracellular response, the nucleic acid cargo needs to disassemble from the inorganic nanoparticle construct and escape the endosome.To achieve intracellular response, the nucleic acid cargo needs to disassemble from the inorganic nanoparticle construct and escape the endosome. The mechanism by which these events (cell internalization and endosomal escape) occur depends on the identity and properties of the inorganic core, chemistry of the conjugation technique utilized and response of other nanoparticle components to cellular or external stimuli (Sokolova and Epple 2008). For example, magnetic iron oxide ( $\text{Fe}_3\text{O}_4$ ) nanoparticle (MNP), when utilized as a delivery vehicle, can be mechanically stimulated to produce oscillating magnetic fields which could then promote more efficient endocytosis (Fouriki and Dobson 2014). Furthermore, inclusion of cell penetrating peptide and cationic amphiphilic polymer (i.e. polyethylenimine, PEI) transfecting components assists in the endosomal escape via membrane destabilization and osmotic swelling, respectively (Thomas and Klibanov 2003; Dowaidar et al. 2017). On the other hand, biocompatible MOFs like Zeolitic Imidazolate Framework 8 (ZIF-8) possess a hydrophobic and positively charged surface (Zhuang et al. 2014), which enable them to interact with the cell membrane and be internalized through endocytosis.

Another interesting property of MOFs such as ZIF-8 is their pH responsiveness, wherein at low pH, the protonation of organic ligands triggers the disassembly of the MOF structure by abrogating the metal ion coordination (Zhuang et al. 2014; Tiwari et al. 2017). This is particularly beneficial for controlled delivery and release of nucleic acid material and any therapeutic cargo since endosomes contain an acidic environment (Li et al. 2019; Poddar et al. 2019)(Li et al. 2019; Poddar et al. 2019). In addition, the disturbance in endosomal pH due to the protonation of organic ligands and the burst of metal ion concentration, could cause osmotic swelling and consequently, endosomal rupture. For these reasons, MOFs such as ZIF-8 are gaining widespread attention as a viable nucleic acid delivery system.

### 2.9 Nucleic Acid Displaying Nanostructures (NADNs)

Field Code Changed

Formatted: Font: Not Bold

Formatted: Justified

## Virus Structure and Mechanism Inform the Design of Nucleic Acid Delivery Systems

1139 A promising use of a metal nanoparticle for nucleic acid delivery is exemplified by spherical nucleic  
1140 acids (SNAs) (Mirkin et al. 1996; Cutler et al. 2011; Cutler et al. 2012)(Mirkin et al. 1996; Cutler et  
1141 al. 2011; Cutler et al. 2012). SNAs radially display a high density of nucleic acids around a spherical  
1142 nanoparticle. The introduction of high concentrations of salt masks the polyanionic backbone of the  
1143 nucleic acids, permitting clustering around a very small surface area. SNAs have low immunogenicity  
1144 (Massich et al. 2009) and are readily taken up by cells (Cutler et al. 2011) via caveolin dependent  
1145 endocytosis (Choi et al. 2013), eliminating the need for potentially toxic transfection agents (Cutler et  
1146 al. 2011; Cutler et al. 2012)(Cutler et al. 2011; Cutler et al. 2012). The attachment of nucleic acids to  
1147 a scaffold enhances their target binding affinity by restricting their conformational flexibility, reducing  
1148 the entropic cost of binding (Lytton-Jean and Mirkin 2005). Importantly, the overall 3D architecture  
1149 imparts nuclease resistance through steric shielding and enhanced local ionic strength (Seferos et al.  
1150 2009). While the metallic gold core provides a means of sensing and tracking the intracellular fate of  
1151 the nanoconstructs (Mirkin et al. 1996; Cutler et al. 2012)(Mirkin et al. 1996; Cutler et al. 2012), it has  
1152 no therapeutic use. (Brodin et al. 2015; Samanta et al. 2020)(Banga et al. 2014) Thus, later generations  
1153 of SNAs have redirected towards biocompatible silica shells (Young et al. 2012). Nevertheless, this  
1154 steric-based mechanism of nucleic acid protection has defined an entire class of nucleic acid delivery  
1155 systems. These nucleic acid displaying nanomaterials or NADNs, have recently been reviewed by  
1156 Gudipati and colleagues (Gudipati et al. 2019) These nucleic acid displaying nanomaterials or NADNs,  
1157 have recently been reviewed by Gudipati and colleagues (Gudipati et al. 2019).

1158 Designed to build upon the successful properties of SNAs, NADNs utilize densely packed  
1159 oligonucleotides around a scaffold, enhancing oligonucleotide stability and permitting scavenger-  
1160 mediated endocytosis but are built upon biodegradable core materials. The scaffolds of reported  
1161 NADNs are chemically diverse (Gudipati et al. 2019)(Gudipati et al. 2019) and can be programmed  
1162 for responsiveness to biochemical or external stimuli (Rush et al. 2013; Banga et al. 2017; Santiana et  
1163 al. 2017; F. Ding et al. 2018; Roloff et al. 2018; Ruan et al. 2018)(Rush et al. 2013; Banga et al. 2017;  
1164 Santiana et al. 2017; F. Ding et al. 2018; Roloff et al. 2018; Ruan et al. 2018). For example, our lab  
1165 developed nucleic acid nanocapsules (NANs) comprised of nucleic acids photochemically tethered to  
1166 the surface of stimuli responsive, crosslinked micelles (Awino et al. 2017; Santiana et al. 2017).  
1167 Nucleic acid nanostructures generally lack a fully established mechanism of cellular uptake and  
1168 intracellular fate (Juliano 2018) Nucleic acid nanostructures generally lack a fully established  
1169 mechanism of cellular uptake and intracellular fate (Juliano 2018). For this reason, following the  
1170 design of first generation esterase cleavable NANs (Awino et al. 2017), the synthesis of NAN-  
1171 encapsulated Au nanoparticles allowed the tracking of the intracellular fate of the construct. Through  
1172 TEM, evidence has been shown for endocytotic uptake and subsequent pH or enzyme triggered  
1173 disassembly (Santiana et al. 2017).

### 1174 3 — Barriers establish design considerations

1175 The high delivery efficiency of viruses is due to the elaborate use of ligands in the form of glycoproteins  
1176 and peptides. Similarly, non-viral nucleic acid carriers employ aptamers, peptides, sugars, small  
1177 molecules, lipids, hydrophobic groups, and antibodies to achieve transfection (R.L. Juliano 2018; Ni  
1178 et al. 2016). Beyond cell targeting, these domains are essential for productive attachment, uptake,  
1179 endosomal escape, nuclear targeting, and entry as illustrated in Figure 2. This section discusses how  
1180 viral and non-viral vectors alike lock on to their target hosts, become internalized, and control  
1181 intracellular fate through key design components integrated to overcome extra- and intracellular  
1182 barriers of nucleic acid delivery.

#### 1183 3.1 Targeting, Attachment and Entry

Formatted: Font color: Auto

Formatted: Justified

Formatted: Font: Not Bold

Formatted: Justified

## Virus Structure and Mechanism Inform the Design of Nucleic Acid Delivery Systems

1184 Tropism is the ability of viruses to target specific cell types by binding their surface protein or peptide  
1185 ligands to specific host cell receptors (Ni et al. 2016). For example, the influenza virus (IV) targets  
1186 bronchial and tracheal epithelial cells using the ligand hemagglutinin 1 (HA-1) that binds to the sialic  
1187 acids of certain surface polysaccharides of the host cell (Mammen et al. 1998)(Mammen et al. 1998).  
1188 In the context of synthetic delivery systems, targeted delivery confers safety, effectivity, and efficiency.  
1189 It limits the release of the therapeutic to diseased cells or tissues, minimizing adverse off-target effects  
1190 that could outweigh therapeutic benefits. Secondly, it enhances effectivity by localizing a high  
1191 concentration of the drug to a specific site. Third, efficiency is achieved by providing access to sites  
1192 such as certain cells or subcellular locations (e.g. nucleus) that are normally inaccessible to the  
1193 therapeutic (Rohovic et al. 2017)(Rohovic et al. 2017).

1194 Maginis (Maginnis 2018) provides a comprehensive review of how virus interactions with the host  
1195 receptors govern pathogenicity. Worth noting is the redundancy in target primary receptors, diversity  
1196 of secondary receptors, and evolutionarily conserved mechanisms among viruses. One such  
1197 mechanism is the conformational changes involved in sequential binding to multiple receptors that lead  
1198 to fusion or endocytosis. For example, the binding of the human immunodeficiency virus (HIV)  
1199 glycoprotein (GP) to cluster of differentiation 4 (CD4), its primary receptor, drives structural changes  
1200 within the GP and CD4, facilitating a subsequent interaction with a coreceptor that then mediates viral  
1201 entry (Wilén et al. 2012)(Wilén et al. 2012). The involvement of coreceptors form the basis of some  
1202 anti-viral drugs such as Maraviroc, a US Food and Drug Administration (FDA) and European  
1203 Medicines Agency (EMA) approved HIV/AIDS treatment. It acts by antagonizing Cys-Cys chemokine  
1204 receptor 5 (CCR5), the secondary receptor of HIV in CD4<sup>+</sup> T cells. Maraviroc binding induces a  
1205 change to the inactive conformer of CCR5 (López-Huertas et al. 2017). This temporal control afforded  
1206 by the dynamic structure of ligands and multiple receptors presents an opportunity for designing more  
1207 specific and efficient nucleic acid delivery systems.

1208 Integrins are of particular interest because they are commonly involved in viral internalization. They  
1209 are heterodimeric cell surface receptors that mediate cell adhesion, migration, differentiation, and  
1210 tumor growth. The binding of a virus to a host induces the clustering and/or structural changes of  
1211 integrins, resulting in intracellular cues that enhance binding affinity, drive structural changes in the  
1212 cytoskeleton, and/or facilitate uptake. This is demonstrated by certain viruses such as the AdV whose  
1213 secondary attachment to integrins initiates intracellular signals that ultimately lead to viral uptake  
1214 (Stewart and Nemerow 2007).

1215 For synthetic vectors, the use of multiple ligands for enhanced specificity and uptake can be guided by  
1216 knowing which receptors are overexpressed in the tissue or region of interest. (Nie et al. 2011)(Dong  
1217 et al. 2018)For instance, Nie et al (Nie et al. 2011) developed a synthetic dual ligand targeted vector  
1218 in which the DNA is condensed by PEI. In this study, they conjugated PEG-ylated PEI-based  
1219 polyplexes with peptides B6 and arginylglycylaspartic acid (RGD) that target transferrin and integrin,  
1220 respectively. This strategy exploits the fact that tumor cells overexpress transferrin while vasculature  
1221 that supply blood to these newly formed tumor cells overexpress integrins.

1222 Multivalent interactions between the viral ligands and host cell surface receptors not only amplify the  
1223 strength of the interaction but also promote viral entry. This is exemplified by IV where the interaction  
1224 of multiple capsid protein trimers (2-4 per 100 nm<sup>2</sup>) with spatially concentrated sialic acid  
1225 functionalities on the surface of the host cell (50-200 per 100 nm<sup>2</sup>) is necessary for effective attachment  
1226 and uptake (Mammen et al. 1998)(Mammen et al. 1998). This parallels with carbohydrate-based  
1227 delivery systems such as siRNAs conjugated to N-acetylgalactosamine (GalNAc) for hepatic targeting.  
1228 GalNAc, in turn, involves multi-site interactions with asialoglycoprotein receptors (ASGPR) of



## Virus Structure and Mechanism Inform the Design of Nucleic Acid Delivery Systems

1229 hepatocytes, facilitating endocytosis (Nair et al. 2014). Furthermore, binding may involve nonspecific  
1230 electrostatic interactions with primary attachment factors (AFs) such as small and charged proteins,  
1231 lipids, or carbohydrates (Boulant et al. 2015). Furthermore, binding may involve nonspecific  
1232 electrostatic interactions with primary attachment factors (AFs) such as small and charged proteins,  
1233 lipids, or carbohydrates (Boulant et al. 2015). The involvement of several receptors also implies the  
1234 coordinated presentation of viral ligands (Ni et al. 2016). For the human cytomegalovirus (HCMV),  
1235 the binding of its glycoproteins to both the epidermal growth factor receptors (EGFR) and integrin on  
1236 the host cell brings EGFR and integrins into close proximity, eliciting signaling responses that facilitate  
1237 cellular uptake and nuclear trafficking (Wang et al. 2005)(Wang et al. 2005). Additionally, some  
1238 viruses further coat their surface with blood factors that expand their range of targets. For example,  
1239 AdV associates with coagulation factor X (FX) in the blood, enabling liver retargeting (Alba et al.  
1240 2010).

1241 Apart from high surface density, the spatial arrangement of the ligands is equally important. For  
1242 example, the internalization of the simian virus 40 (SV40) necessitates the pentameric presentation of  
1243 its viral capsid protein 1 (VP1) to successfully bind to the cell surface  
1244 monosialotetrahexosylgangliosides (GM1) and facilitate endocytosis (Ewers et al. 2010). It is worth  
1245 noting that the clustering of cellular receptors brought about by viral association with the host cell  
1246 could precede intracellular signaling cascades. Thus, this provides the virus with a means to exploit or  
1247 manipulate biological function for its successful internalization and navigation within the host cell (Ni  
1248 et al. 2016). For IV, the clustering of sialylated Tyr kinase receptors as a result of viral attachment  
1249 could facilitate the activation of tyrosine kinases that may then have a direct role on endocytosis  
1250 (Sieben et al. 2018).

1251 Many non-viral strategies have derived targeting domains from viral ligands for specific cell or tissue  
1252 targeting. For example, the AdV-derived RGD peptide has been used to direct the nucleic acid delivery  
1253 of lipoplexes, dendriplexes, and polyplexes to tumor cells overexpressing integrin  $\alpha_v\beta_3$  on the cell  
1254 surface (Danhier, Breton, and Pr at 2012). The successful delivery of RGD-conjugated ASOs to  
1255 melanoma cells has also been demonstrated (Juliano et al. 2008; Kang et al. 2008; Alam et al. 2008;  
1256 Juliano et al. 2011)(Juliano et al. 2008; Kang et al. 2008; Alam et al. 2008; Juliano et al. 2011).

### 1257 3.2 Cell Penetrating Peptides (CPPs) as ligands

1258 Cell penetrating peptides (CPPs) or protein transduction domain (PTDs) are short peptide sequences  
1259 with cell penetrating ability. Their properties and use in macromolecular delivery have been reviewed  
1260 elsewhere (LeCher, Nowak, and McMurry 2017; Taylor and Zahid 2020; Takechi et al. 2012)(LeCher,  
1261 Nowak, and McMurry 2017; Taylor and Zahid 2020; Takechi et al. 2012). CPPs such as the TAT  
1262 peptide (derived from the transactivator of transcription protein of HIV) are commonly hydrophilic  
1263 and cationic, but amphiphatic, hydrophobic, or anionic CPPs have also been reported (LeCher, Nowak,  
1264 and McMurry 2017). While many of these peptides are non-cell specific, cell-specific CPPs such as  
1265 the cardiac targeting peptide (CTP) for cardiomyocytes and Huntingtin associated protein 1 (HAP-1)  
1266 for synovial cells have been identified using phage display. The uptake mechanism is not clear, but it  
1267 is evident from literature that transduction occurs by both energy dependent and independent  
1268 pathways. Internalization of CPPs is initiated by nonspecific electrostatic interactions with the surface  
1269 of the plasma membrane followed by macropinocytosis. Increasing the hydrophobicity of CPP  
1270 increases the tendency of cellular uptake. Thus, the cellular uptake pathway could change with the type  
1271 of CPP, cell line and type of cargo attached to it (Taylor and Zahid 2020; Takechi et al. 2012)(Taylor  
1272 and Zahid 2020; Takechi et al. 2012).

Formatted: Font: Not Bold

Formatted: Justified

## Virus Structure and Mechanism Inform the Design of Nucleic Acid Delivery Systems

Although CPPs are simple, easy to conjugate, and have been used to deliver pDNA, siRNA, ASOs and other types of cargo in pre clinical studies, the immunogenicity, toxicity, and lack of specificity of CPP-based therapeutics hamper clinical translation (Taylor and Zahid 2020; Takechi et al. 2012). Furthermore, CPP-based carriers still fall short of bringing the nucleic acid out of the endo-lysosomal track (LeCher et al. 2017). Although CPPs are simple, easy to conjugate, and have been used to deliver pDNA, siRNA, ASOs and other types of cargo in pre clinical studies, the immunogenicity, toxicity, and lack of specificity of CPP-based therapeutics hamper clinical translation (Taylor and Zahid 2020; Takechi et al. 2012). Furthermore, CPP-based carriers still fall short of bringing the nucleic acid out of the endo-lysosomal track (LeCher et al. 2017).

### 3.3 Antibodies as ligands

Monoclonal antibodies (mAbs) have been highly effective at targeting delivery of cytotoxic drugs to cancer cells (Sievers et al. 2001; Younes et al. 2010; Krop et al. 2010). Their ability to specifically and avidly bind to cell specific receptors makes them equally viable targeting domains for biologics such as therapeutic nucleic acids. Their use in directing nucleic acid carriers has been demonstrated in several studies (Moffett et al. 2017; Palanca Wessels et al. 2011; Ngamcherdtrakul et al. 2015; Huggins et al. 2019; Nanna et al. 2020). They can be either directly conjugated to the nucleic acid (Huggins et al. 2019; Nanna et al. 2020) or to the vector (Moffett et al. 2017; Palanca Wessels et al. 2011; Ngamcherdtrakul et al. 2015). Antibody RNA conjugates (ARCs) are promising in that they overcome possible limitations of nanoparticle-based formulations such as poor diffusivity, toxicity, and immunogenicity while still significantly extending the half life of the cargo (Nanna et al. 2020). Earlier conjugation methods for therapeutic attachment to antibodies involve nonselective conjugation to Lys or Cys residues. Consequently, prior formulations suffer mainly from product heterogeneity (Huggins et al. 2019). Recently published works on ARC synthesis involved highly specific mechanisms for conjugation, giving a precise drug:antibody ratio (DAR) of 2 (Huggins et al. 2019; Nanna et al. 2020).

### 3.4 Aptamers as ligands

Nucleic acid aptamers offer another promising approach in delivering nucleic acid cargos to specific cell types (Dassie and Giangrande 2013). Aptamers are short, chemically synthesized, single stranded oligonucleotides (DNA or RNA), which adopt a specific three dimensional (3D) structure and bind to their ligands with high affinity ( $K_D$ s in the pico- to nano-molar range) (Sun et al. 2014)(Sun et al. 2014). Aptamers can be developed for a particular cell receptor via Systematic Evolution of Ligands by Exponential enrichment (SELEX) (Juliano 2016)(Juliano 2016). In the context of nucleic acid delivery, aptamers present several advantages in terms of clinical applicability, stability, and ease of synthesis. Specifically, due to their small size and low molecular weight, aptamers can penetrate tissue barriers and reach their targets *in vivo* efficiently (Sun et al. 2014)(Sun et al. 2014). They are also thermally stable and generally nonimmunogenic *in vivo*. In addition, the chemical synthesis of aptamers can be achieved in a rapid, large-scale and low-cost approach (Sun et al. 2014)(Sun et al. 2014).

Although aptamer nucleic acid conjugates possess no innate mechanisms for endosomal escape on their own, aptamers can be conjugated on to nucleic acid carriers with endosomal escape activity as a way to improve cell specific targeting (Yan and Levy 2018). For example, Zhao and co-workers (Zhao et al. 2011) designed a nanocomplex composed of cationic PEI core endosomal escape component,

Formatted: Font: Not Bold

Formatted: Justified

Formatted: Font: Not Bold

Formatted: Justified

## Virus Structure and Mechanism Inform the Design of Nucleic Acid Delivery Systems

1316 CD30 RNA aptamer targeting lymphoma cells and siRNA that inhibits the expression of anaplastic  
1317 lymphoma kinase (ALK). Such an assembly was proven to selectively bind lymphoma cells, deliver  
1318 the siRNA intracellularly, silence ALK expression, and arrest the growth of lymphoma cells (Zhao et  
1319 al. 2011).

### 1320 3.5 Small molecule ligands

1321 Small molecules are commonly used as targeting ligands as they are easily synthesized at a modest  
1322 cost. They are more stable than biological ligands such as aptamers and peptides, and their conjugation  
1323 often is relatively simple. However, these molecules are often not the natural ligands of the target cell  
1324 receptors and thus have lower affinity and specificity for a given receptor, the latter giving rise to off-  
1325 target effects. Nevertheless, the relative structural simplicity and functional designability of small  
1326 molecules make them attractive and viable targeting domains (Friedman et al. 2013)(Friedman et al.  
1327 2013).

1328 For example, folate (Vitamin B9) is widely used for targeting folate receptor positive cell lines, with a  
1329 high affinity ( $K_D = 1$  nM) and minimal toxicity. Folate functionalized vectors are typically internalized  
1330 via receptor mediated endocytosis, but reduced folate carriers (RFCs), though having lower affinity,  
1331 directly enter the cytosol. Folate expressing imaging agents are currently in Phase I and Phase II  
1332 clinical trials, but they are not yet clinically approved for targeting therapeutic nanoparticles (Sikorski  
1333 et al. 2015)(Sikorski et al. 2015).

1334 Likewise, benzamides (anisamide, in particular) target sigma receptors that are upregulated in cancer  
1335 cell lines. Benzamide analogues can also target dopamine receptors selectively. So far, these have been  
1336 used to deliver small molecule drugs such as doxorubicin encapsulated in liposome but have not been  
1337 explored in gene delivery yet (Banerjee et al. 2004; Mach et al. 2004). Likewise, benzamides  
1338 (anisamide, in particular) target sigma receptors that are upregulated in cancer cell lines. Benzamide  
1339 analogues can also target dopamine receptors selectively. So far, these have been used to deliver small  
1340 molecule drugs such as doxorubicin encapsulated in liposome but have not been explored in gene  
1341 delivery yet (Banerjee et al. 2004; Mach et al. 2004).

1342 The Burgess lab synthesized a combinatorial library of bivalent small molecules that bind to specific  
1343 parts of cell receptors (Shi et al. 2010). The general motif mimics the  $\beta$  turn hot spots of protein ligand  
1344 or protein-protein interactions (Burgess 2001; Shi et al. 2010). These bivalent small molecules are  
1345 covalently attached to the surface of bilamellar invaginated vesicles (BIVs) to target tumor vasculature  
1346 and deliver plasmid DNA for anti-angiogenic cancer therapy. The cationic ligands are modified with  
1347 a hydrophobic tail that penetrate the cellular membrane and aid in uptake. Reversible masking agents  
1348 in the form of neutral small (<500 MW) lipids are added to minimize nonspecific uptake. These agents  
1349 shield the positive charge of BIV and are sequestered once the target receptor is engaged and fusion  
1350 with the plasma membrane occurs (Shi et al. 2010). The Burgess lab synthesized a combinatorial library  
1351 of bivalent small molecules that bind to specific parts of cell receptors (Shi et al. 2010). The general  
1352 motif mimics the  $\beta$  turn hot spots of protein ligand or protein-protein interactions (Burgess 2001; Shi  
1353 et al. 2010). These bivalent small molecules are covalently attached to the surface of bilamellar  
1354 invaginated vesicles (BIVs) to target tumor vasculature and deliver plasmid DNA for anti-angiogenic  
1355 cancer therapy. The cationic ligands are modified with a hydrophobic tail that penetrate the cellular  
1356 membrane and aid in uptake. Reversible masking agents in the form of neutral small (<500 MW) lipids  
1357 are added to minimize nonspecific uptake. These agents shield the positive charge of BIV and are  
1358 sequestered once the target receptor is engaged and fusion with the plasma membrane occurs (Shi et  
1359 al. 2010).

Formatted: Font: Not Bold

Formatted: Justified

## Virus Structure and Mechanism Inform the Design of Nucleic Acid Delivery Systems

### 3.6 The Endosomal Escape Challenge

Most viruses and synthetic nucleic acid carriers are internalized via endocytosis. While viruses manage to escape into the cytosol efficiently, synthetic carriers pale in contrast, only having as much as 1-2% endosomal release. Thus, endosomal escape is the bottleneck of nucleic acid delivery and ultimately determines therapeutic delivery (Gilleron et al. 2013; Shete, Prabhu, and Patravale 2014; Solby et al. 2017). One way this problem can be eliminated is by designing a particle that directly transfects cargo to the cytosol (Jiang et al. 2015)(Jiang et al. 2015). In 2011, Vickers et al. (Vickers et al. 2011) showed that exogenous miRNA are being directly delivered to the cytosol of target cells by endogenous high density lipoprotein (HDL). This direct transfection is mediated by scavenger receptor B1 (SR B1) (Vickers et al. 2011) and has also been demonstrated for the direct delivery of fluorescently labeled siRNA to SR B1 expressing tumor cells (Shahzad et al. 2011).

In addition, it has been demonstrated that siRNA (Y. Jiang et al. 2015; 2018) and CRISPR Cas9 ribonucleoprotein (CRISPR Cas9 RNP) (Mout et al. 2017) can be directly transfected across the cell membrane through nanoparticle stabilized nanocapsules (NPSCs). Previously shown to mediate the direct cytosolic delivery of small molecules (Yang et al. 2011)(Yang et al. 2011) and proteins (Tang et al. 2013), NPSCs are formed by assembling a preformed complex of nucleic acids and arginine coated nanoparticles on the surface of an oil droplet (Jiang et al. 2015)(Jiang et al. 2015). The inorganic and lipid based hybrid construct efficiently delivered nucleic acid cargo to the cytosol with an siRNA knockdown efficiency of 90% (Jiang et al. 2015; 2018)(Jiang et al. 2015; 2018) and to the nucleus with a CRISPR Cas9 RNP gene editing efficiency of 30% (Mout et al. 2017). In vivo assays of spleen directed siRNA loaded NPSCs showed good selectivity and immunomodulatory activity, demonstrating the potential for targeted delivery (Jiang et al. 2018)(Jiang et al. 2018).

While direct fusion with the plasma membrane may seem simpler, endocytosis offers several advantages — one being evasion of molecular crowding in the cytosol and microtubule assisted shuttling to the nucleus or other subcellular locations (Barrow et al. 2013)(Barrow et al. 2013). Furthermore, as endocytosis is often linked to signaling cascades, the invading particle can influence its intracellular fate by targeting the appropriate receptor (Marsh and Helenius 2006; Nemerow and Stewart 1999). For viruses like HIV, endocytosis can lower the risk of triggering an immune response because rapid endocytotic uptake minimizes the exposure of viral immunogenic epitopes to the extracellular milieu (Miyachi et al. 2009). Importantly, endocytosis enables opportunities to embed responsiveness of the carrier to endolysosomal cues. For these reasons, research efforts are more directed towards enhancing the endosomal escape efficiency.

Staring et al. (Staring et al. 2018)(Staring et al. 2018) provides an excellent discussion of how viruses carry out endosomal escape to avoid degradation or recycling. A unifying theme is a conformational change in viral structural proteins that drives viral and endo-lysosomal membrane fusion for enveloped viruses or membrane penetration by nonenveloped viruses. These structural rearrangements are triggered by cellular cues such as low pH or proteolytic activity. While membrane penetration is not completely understood, the exact mechanism can range from temporary membrane destabilization to pore formation to complete disruption. For their remarkable endosomal escape efficiency, viruses have served as templates in engineering the endosomal escape of non-viral vectors.

The elegance of viral endosomal escape is exemplified by AdV. The mechanical stress caused by binding multiple receptors primes the shedding of the capsid coat (Burekhardt et al. 2011). This liberates membranolytic viral protein VI that then creates small lesions on the plasma membrane. As a response, the host secretes lipid hydrolase acid sphingomyelinase (ASMase) that catalyzes ceramide

Formatted: Font: Not Bold

Formatted: Justified

## Virus Structure and Mechanism Inform the Design of Nucleic Acid Delivery Systems

1404 production for membrane repair. The increased level of ceramide enhances interaction of protein VI  
1405 with the endosomal membrane, leading to endosomal rupture (Staring et al. 2018). The increased level  
1406 of ceramide enhances interaction of protein VI with the endosomal membrane, leading to endosomal  
1407 rupture (Staring et al. 2018). A study by Ortega Esteban et al. (Ortega Esteban et al. 2015) showed  
1408 that upon maturation, the expansion of the genome stiffens virions as in the case of AdV, rendering the  
1409 capsid more susceptible to disruption.

1410 Viral proteins contain critical His residues whose imidazole groups (pKa ~6) are protonated as the pH  
1411 drops, thereby acting as internal buffers. This “proton sponge” effect leads to endosomal swelling and  
1412 rupture. For this reason, His residues (5–20) are added to peptide domains (such as TAT) of nucleic  
1413 acid carriers (Lo and Wang 2008). Similarly, viral fusogenic peptides such as IV HA2 have been  
1414 mimicked for endosomal escape. Following endocytosis, the pH drop triggers the conformational  
1415 change of the viral GP spike hemagglutinin (HA) via proteolysis, revealing the hydrophobic subunit  
1416 HA2 that facilitates the hemifusion of the viral and endosomal membranes. Thus, the RNP contents  
1417 escape into the cytosol (Pinto et al. 1992). Thus, the RNP contents escape into the cytosol (Pinto et al.  
1418 1992). This mechanism has inspired Lönn et al. (Lönn et al. 2016) to develop endosomal escape  
1419 domains (EEDS), which are hydrophobic peptides containing Trp and Phe residues. For EED-TAT-  
1420 siRNA conjugates, the presence of indole and/or phenyl rings at an optimal distance of six PEG units  
1421 from the TAT domain is able to significantly enhance the endosomal escape of siRNA.

1422 Synthetic HA2 analogs have demonstrated improved endosomal disruption ability. The Glu-Ala-Leu-  
1423 Ala (GALA) peptide is a targeting and endosomal escape peptide that has been used in siRNA delivery  
1424 (Subbarao et al. 1987; Kusumoto et al. 2013; 2014) (Subbarao et al. 1987; Kusumoto et al. 2013; 2014).  
1425 GALA was originally designed to undergo an acid-triggered change from a random coil to a  
1426 membrane-disrupting alpha-helical structure (Subbarao et al. 1987). Later on it was found to target the  
1427 sialic acid residues on lung endothelium (Kusumoto et al. 2013), making it a promising multifunctional  
1428 ligand. On the other hand, KALA is a modified version of GALA with Ala to Lys substitutions and  
1429 reduced Glu content. These features allow DNA condensation, endo-lysosomal disruption, and nucleic  
1430 acid release (Wyman et al. 1997; Shaheen et al. 2011). Moreover, the concentration of the peptide  
1431 dictates the extent of its interaction with the membrane. While the peptide domains only engage the  
1432 membrane electrostatically at low concentrations, pore formation is observed at higher concentrations  
1433 (Ye et al. 2012) (Ye et al. 2012).

1434 Similar to IV, the concept of hydrophobic unmasking has also been exhibited by NANs. Amphiphilic  
1435 surfactant-DNA conjugates were constructed to mimic the disassembly products of the nanocapsule.  
1436 The membrane-permeating ability of these conjugates (Hartmann et al. 2018) suggests that the  
1437 hydrophobic group revealed only after disassembly could facilitate the endosomal escape of the  
1438 degradation products.

1439 Ebolaviruses (EBOV) have a unique mechanism of achieving endosomal escape.  
1440 Endosomal/lysosomal acidification activates proteases cathepsin B and cathepsin L that cleave the  
1441 EBOV GP. The proteolytic cleavage reveals the active conformer GP2, which then binds to Niemann-  
1442 Pick C1 (NPC1), a cholesterol transporter embedded on the endo-lysosomal membrane. This  
1443 interaction facilitates the fusion of the viral and lysosomal membranes, releasing the viral nucleocapsid  
1444 into the cytosol (Carette et al. 2011). Because NPC1 is involved in vesicular trafficking, it is even  
1445 more interesting that it is responsible for limiting lipid-nanoparticle (LNP)-mediated siRNA delivery  
1446 by shuttling the bulk of the LNPs back to the outside of the cell after endocytosis (Sahay et al. 2013).  
1447 Moreover, inhibition of NPC1 greatly increases the cytosolic delivery of the siRNA cargo (H. Wang  
1448 et al. 2016). Alternatively, the entrapment of oligonucleotides in the late endosomes can be exploited.



## Virus Structure and Mechanism Inform the Design of Nucleic Acid Delivery Systems

1449 Instead of inhibiting NPC1, a ligand that engages the intracellular receptor can be used to facilitate the  
1450 cytosolic delivery of the cargo. This could potentially be applicable to lipid-based systems where  
1451 membrane fusion precedes content release.

1452 Various small molecules have been used as tools to cross the endo-lysosomal membrane either through  
1453 direct conjugation to or co-delivery with the nucleic acid cargo (Gilleron et al. 2015; Osborn et al.  
1454 2015; Maxfield 1982; Juliano et al. 2018; Joris et al. 2018; Du Rietz et al. 2020; B. Yang et al. 2015;  
1455 Wang et al. 2017)(Gilleron et al. 2015; Osborn et al. 2015; Maxfield 1982; Juliano et al. 2018; Joris et  
1456 al. 2018; Du Rietz et al. 2020; B. Yang et al. 2015; Wang et al. 2017). For example, cationic  
1457 amphiphilic drugs (CADs) have been shown to enhance siRNA delivery due to their ability to increase  
1458 the permeability of the endo-lysosomal membrane (Joris et al. 2018; Du Rietz et al. 2020). On the  
1459 other hand, oligonucleotide enhancing compounds (OECs) are small molecules covalently linked to  
1460 siRNAs, ASOs, and SSOs and have been screened for improved cytosolic and nuclear delivery without  
1461 an external carrier (Yang et al. 2015; Wang et al. 2017)(Yang et al. 2015; Wang et al. 2017). Through  
1462 a set of structure-activity experiments, hydrophobic phenyl rings, the presence and relative placement  
1463 of a tertiary amine, and carbamate modifications were identified as essential and tunable features for  
1464 enhancing the therapeutic availability of the oligonucleotides. The manner by which OECs influence  
1465 the intracellular redistribution of oligonucleotides is not yet clear but, similar to CADs, involves an  
1466 increase in endomembrane permeability rather than complete disruption. Though the potency imparted  
1467 by OECs holds great promise, the challenge of enhancing efficacy while minimizing cytotoxicity  
1468 remains (Juliano et al. 2018)(Juliano et al. 2018).

1469 Orellana et al. (Orellana et al. 2019) reported the use of nigericin, a novel, small molecule endosomal  
1470 escape agent, to enhance the cytosolic delivery of folate conjugated miRNA. Nigericin is a proton  
1471 ionophore that exchanges osmotically inactive protons inside the endosomes with potassium ions in  
1472 the cytosol. The combined high concentration of sodium and potassium ions raises the osmotic  
1473 pressure inside the endosomes, resulting in endosomal rupture and release of the miRNA payload.

1474 In many ways, the outstanding difference in the transfection efficiency of viruses and synthetic vectors  
1475 stems from the lack of a consensus of what drives endosomal escape. Escape from the endosome is  
1476 influenced by a large range of factors such as nanoparticle properties (size, shape, and composition),  
1477 mode of cellular uptake, and the type of cell (Selby et al. 2017). Moreover, mechanistic insights tend  
1478 to be context dependent as they are influenced by multiple factors such as the type of carrier, type of  
1479 cell, and experimental conditions (LeCher et al. 2017)Moreover, mechanistic insights tend to be  
1480 context dependent as they are influenced by multiple factors such as the type of carrier, type of cell,  
1481 and experimental conditions (LeCher et al. 2017). Structural studies on determinants of endosomal  
1482 escape, while informative, often do not address the possible interplay of uptake route and intracellular  
1483 trafficking. Moreover, uptake mechanisms are overlapping and poorly understood, making it difficult  
1484 to determine the exact uptake mechanism of a particular construct (Nelemans and Gurevich 2020).  
1485 Filling such scientific gaps can guide the design of more efficient nucleic acid delivery systems.

### 1486 3.7 Nuclear Targeting and Entry

1487 The cell nucleus is the main regulator of intracellular functions such as gene activation, cell division  
1488 and proliferation, metabolism and protein production. As such, it is considered as the most important  
1489 target to deliver intact therapeutic exogenous oligonucleotides to treat diseases at the genetic level  
1490 (Faustino et al. 2007; Pouton et al. 2007). Apart from gene therapy, nucleus targeting can be applied  
1491 to chemotherapy, photodynamic photothermal therapy, synergistic therapy, resolving multi drug  
1492 resistance (MDR), and nuclear imaging (Seynhaeve et al. 2013; Qiu et al. 2015; Wu et al. 2015). For

Formatted: Font: Not Bold

Formatted: Justified

## Virus Structure and Mechanism Inform the Design of Nucleic Acid Delivery Systems

1493 this reason, aside from therapeutic nucleic acids, many small molecule drugs, photoactivable and ROS  
1494 generating therapeutic modalities also need to be delivered near/into the cell nucleus (Faustino et al.  
1495 2007; Pouton et al. 2007). The cell nucleus is the main regulator of intracellular functions such as gene  
1496 activation, cell division and proliferation, metabolism and protein production. As such, it is considered  
1497 as the most important target to deliver intact therapeutic exogenous oligonucleotides to treat diseases  
1498 at the genetic level (Faustino et al. 2007; Pouton et al. 2007). Apart from gene therapy, nucleus  
1499 targeting can be applied to chemotherapy, photodynamic photothermal therapy, synergistic therapy,  
1500 resolving multi drug resistance (MDR), and nuclear imaging (Seynhaeve et al. 2013; Qiu et al. 2015;  
1501 Wu et al. 2015). For this reason, aside from therapeutic nucleic acids, many small molecule drugs,  
1502 photoactivable and ROS generating therapeutic modalities also need to be delivered near/into the cell  
1503 nucleus (Faustino et al. 2007; Pouton et al. 2007).

1504 Viral vectors such as adeno-assisted virus (AAV) are capable of delivering a gene of interest across  
1505 the nuclear envelope. However, non-viral vectors are preferred due to the safety issues related to the  
1506 viral carriers. Recently, many advances have been made in the field of nanotechnology aimed at  
1507 optimizing the design and fabrication of non-viral nucleus targeting nanovectors essential for enhanced  
1508 therapeutic index and minimal undesired effects (Yao et al. 2013)(Yao et al. 2013). Although  
1509 ultrasmall particles (typically up to 16 nm) undergo passive diffusion into the nucleus, many  
1510 therapeutic nano-vehicles are larger than the size of the nuclear pore complex (NPC). These large  
1511 carriers can achieve active transport through surface modification wherein the size, charge and density  
1512 of the ligand plays an important role when nucleus targeting is considered. It is worth noting that  
1513 compared to spherical nanoparticles, rod and worm shaped particles more readily undergo passive  
1514 diffusion because their diameter tend to be smaller than the pore size of the NPC (Pan et al. 2018)(Pan  
1515 et al. 2018).

1516 Miller and Dean (Miller and Dean 2009) summarized nucleus targeting ligands that can be used to  
1517 deliver therapeutic nucleic acids. These ligands can be easily modified and conjugated to the surface  
1518 of a nanoparticle or directly to the gene of interest in lieu of developing non-viral nucleus targeting  
1519 gene therapy. For active transport, nucleus targeting ligands are used to deliver the gene which also  
1520 facilitates DNA condensation. Variants of the nucleus localization signal (NLS) peptide derived from  
1521 proteins of nuclear viruses (e.g. SV40, AdV, HIV) are most commonly used as nucleus targeting  
1522 ligands. Carriers decorated with or nucleic acid cargo associated with the NLS peptide sequence  
1523 undergo nuclear uptake via the importin  $\alpha/\beta$  pathway (Pan et al. 2012; Ray et al. 2015) Alternatively,  
1524 the DNA nuclear targeting sequence (DTS) is a 72-bp aptamer derived from SV40 and has innate  
1525 affinity for NLS tagged cytoplasmic proteins such as transcription factors (TFs). So far, DTS-  
1526 expressing plasmids are delivered by electroporation or direct injection. Thus, using DTS as a nuclear  
1527 targeting ligand for nanovectors requires further studies. In addition, plasmids complexed with  
1528 proteins such as high mobility group 1 (HMG-1), histone 2B (H2B) proteins, importin receptors (such  
1529 as karyopherin), and nucleoplasmin show increased transgene expression due to nuclear uptake (Miller  
1530 and Dean 2009). Miller and Dean (Miller and Dean 2009) summarized nucleus targeting ligands that  
1531 can be used to deliver therapeutic nucleic acids. These ligands can be easily modified and conjugated  
1532 to the surface of a nanoparticle or directly to the gene of interest in lieu of developing non-viral nucleus  
1533 targeting gene therapy. For active transport, nucleus targeting ligands are used to deliver the gene  
1534 which also facilitates DNA condensation. Variants of the nucleus localization signal (NLS) peptide  
1535 derived from proteins of nuclear viruses (e.g. SV40, AdV, HIV) are most commonly used as nucleus-  
1536 targeting ligands. Carriers decorated with or nucleic acid cargo associated with the NLS peptide  
1537 sequence undergo nuclear uptake via the importin  $\alpha/\beta$  pathway (Pan et al. 2012; Ray et al. 2015)  
1538 Alternatively, the DNA nuclear targeting sequence (DTS) is a 72-bp aptamer derived from SV40 and  
1539 has innate affinity for NLS tagged cytoplasmic proteins such as transcription factors (TFs). So far,

## Virus Structure and Mechanism Inform the Design of Nucleic Acid Delivery Systems

1540 DTS-expressing plasmids are delivered by electroporation or direct injection. Thus, using DTS as a  
1541 nuclear targeting ligand for nanovectors requires further studies. In addition, plasmids complexed with  
1542 proteins such as high mobility group 1 (HMG-1), histone 2B (H2B) proteins, importin receptors (such  
1543 as karyopherin), and nucleoplasmin show increased transgene expression due to nuclear uptake (Miller  
1544 and Dean 2009).

1545 On the other hand, the dynein binding protein (DBP) is used as a ligand for nuclear uptake as it can  
1546 mediate the transport of cargo via the microtubule-assisted pathway (Favaro et al. 2014; Midoux et al.  
1547 2017; Favaro et al. 2018). These peptides help to actively deliver the nano-vector to the centrosome  
1548 wherein the dynein interacts dynamically with nuclear envelope and rearranges the nuclear lamins,  
1549 thereby increasing the permeability of nucleus (Dalmau Mena et al. 2018). Cohen and Granek (O.  
1550 Cohen and Granek 2014) provided theoretical insights on the rational design of spherical nanocarriers  
1551 that require active transport to the nucleus. On the other hand, the dynein binding protein (DBP) is  
1552 used as a ligand for nuclear uptake as it can mediate the transport of cargo via the microtubule-assisted  
1553 pathway (Favaro et al. 2014; Midoux et al. 2017; Favaro et al. 2018). These peptides help to actively  
1554 deliver the nano-vector to the centrosome wherein the dynein interacts dynamically with nuclear  
1555 envelope and rearranges the nuclear lamins, thereby increasing the permeability of nucleus (Dalmau-  
1556 Mena et al. 2018). Cohen and Granek (Cohen and Granek 2014) provided theoretical insights on the  
1557 rational design of spherical nanocarriers that require active transport to the nucleus.

1558 Other nucleus targeting ligands that have been used for the delivery of proteins are yet to be explored  
1559 for nucleic acid delivery. As an example, Tang et al. (R. Tang et al. 2017)(Tang et al. 2017) have  
1560 explored the nucleus targeting ability of boronate-tagged proteins. Proteins synthetically modified with  
1561 a simple aromatic boronate motif undergo both active and passive nuclear uptake. Passive uptake is  
1562 due to hydrophobic interaction of aromatic ring with the NPC whereas active transport is through  
1563 importin  $\alpha/\beta$  pathway. As compared to peptides and oligonucleotide ligands that are prone to enzymatic  
1564 degradation, this small molecule ligand opens up new targeting strategies. For nucleic acid delivery,  
1565 these benzyl boronate tags can be conjugated to vectors via the benzyl ring or to the nucleic acid itself  
1566 via a PEG-linker.

1567 Although the abovementioned strategies are applied to target the NPC, there are other types of  
1568 nanocarriers which are delivered by disrupting NPCs using light. However, this strategy is only  
1569 applicable when target cell death is desired (Zhu et al. 2018)(Zhu et al. 2018). Nonetheless, designing  
1570 systems that are responsive to external stimuli afford manual control when intracellular biochemical  
1571 stimuli cannot be used for controlled nuclear translocation. Thus, compared to conventional targeting  
1572 strategies, light- or heat-responsive nanoparticles can be the future of the improved intra-nuclear  
1573 delivery.

## 1574 **6** Concluding Remarks

### 1575 **4**

1576 Evolution has honed viruses to be master hijackers of a broad range of host cells. ~~While~~ ~~They~~ ~~they~~  
1577 possess unique structural and mechanistic features, ~~wherein~~, overarching themes such as capsid  
1578 metastability, genome protection, ~~stimuli-responsiveness~~, receptor duality, and synergistic ligand  
1579 activity make ~~them~~ attractive templates for the design of non-viral nucleic acid carriers. ~~Based on these~~  
1580 ~~outstanding characteristics of viruses~~, it is evident that ~~an ideal carrier needs to find a balance between~~  
1581 ~~nucleic acid protection and release~~, two seemingly contradictory functions. ~~A dynamic structure that~~  
1582 ~~responds to site-specific cues such as low pH or enzymatic activity help to control the release of nucleic~~  
1583 ~~acid cargo~~. These cues can vary with microenvironments within a cell, enabling biochemically

Formatted: Justified

Formatted: Normal, Justified, Space Before: 12 pt

Formatted: Not Highlight

Formatted: Not Highlight

Formatted: Not Highlight

## Virus Structure and Mechanism Inform the Design of Nucleic Acid Delivery Systems

1584 [controlled release mechanisms](#). Alternatively, the vector can be made sensitive to external stimuli such  
1585 [as light or temperature](#), which is more applicable to locally delivered formulations (Takemoto et al.  
1586 [2014](#)).

1587  
1588 [While therapeutic nucleic acids have made it to the clinical setting](#), extrahepatic targeting and  
1589 [endosomal escape remain as major hurdles in their delivery](#) (Dowdy 2017). [Viruses commonly target](#)  
1590 [multiple receptors for enhanced specificity and uptake](#), and this collective feature has been applied by  
1591 [synthetic carriers](#) (Dowdy 2017). [Viral mimicry and the development of nucleic acid vectors iterate](#)  
1592 [with our understanding of viral mechanism](#). Accordingly, advancements in techniques that identify  
1593 [viral ligands and corresponding host receptors](#), interrogate structure, and probe dynamics of ligand-  
1594 [receptor interactions may](#) ~~can~~ be translated to the design of more effective targeting domains for  
1595 [synthetic carriers](#).

1596 [In many ways, the outstanding difference in the transfection efficiency of viruses and synthetic vectors](#)  
1597 [stems from the lack of a consensus of what drives endosomal escape](#). [Escape from the endosome is](#)  
1598 [influenced by a large range of factors such as nanoparticle properties \(size, shape, and composition\)](#),  
1599 [mode of cellular uptake, and the type of cell](#) (Selby et al. 2017). Moreover, mechanistic insights tend  
1600 [to be context-dependent as they are influenced by multiple factors such as the type of carrier, type of](#)  
1601 [cell, and experimental conditions](#) (LeCher et al. 2017). Structural studies on determinants of  
1602 [endosomal escape, while informative, often do not address the possible interplay of uptake route and](#)  
1603 [intracellular trafficking](#). Moreover, uptake mechanisms are overlapping and poorly understood,  
1604 [making it difficult to determine the exact uptake mechanism of a particular construct](#) (Nelemans and  
1605 [Gurevich 2020](#)). As uptake mechanisms typically involve signaling cascades, their relationship with  
1606 [intracellular trafficking are important considerations](#). Also, the implication of recycling pathways in  
1607 [viral and non-viral cytosolic access](#) (Carette et al. 2011; Sahay et al. 2013; Wang et al. 2016) suggests  
1608 [further studies on their exact role in therapeutic delivery](#). Filling such scientific gaps may help guide  
1609 [the design of more efficient nucleic acid delivery systems](#). Additionally, some viruses (such as the  
1610 [adenovirus](#)) have been found to exploit cellular responses to membrane disruption concurrent with  
1611 [membrane fusion or penetration](#) (Staring et al. 2018). In this light, future synthetic carriers may also  
1612 [be tailored to utilize host damage control to enhance therapeutic delivery](#). For this to be an effective  
1613 [strategy, it is imperative that the sensing of and response to invading particles by the host cell be](#)  
1614 [exhaustively studied](#).~~In many ways, the outstanding difference in the transfection efficiency of viruses~~  
1615 ~~and synthetic vectors stems from the lack of a consensus of what drives endosomal escape. Escape~~  
1616 ~~from the endosome is influenced by a large range of factors such as nanoparticle properties (size, shape,~~  
1617 ~~and composition), mode of cellular uptake, and the type of cell (Selby et al. 2017). Moreover,~~  
1618 ~~mechanistic insights tend to be context dependent as they are influenced by multiple factors such as~~  
1619 ~~the type of carrier, type of cell, and experimental conditions (LeCher et al. 2017). Structural studies~~  
1620 ~~on determinants of endosomal escape, while informative, often do not address the possible interplay of~~  
1621 ~~uptake route and intracellular trafficking. Moreover, uptake mechanisms are overlapping and poorly~~  
1622 ~~understood, making it difficult to determine the exact uptake mechanism of a particular construct~~  
1623 ~~(Nelemans and Gurevich 2020). As uptake mechanisms typically involve signaling cascades, their~~  
1624 ~~relationship with intracellular trafficking are important considerations. Filling such scientific gaps may~~  
1625 ~~help guide the design of more efficient nucleic acid delivery systems. Viral mimicry and the~~  
1626 ~~development of nucleic acid vectors iterate with our understanding of viral mechanism. Accordingly,~~  
1627 ~~advancements in techniques that identify viral ligands and corresponding host receptors, interrogate~~  
1628 ~~structure, and probe dynamics of ligand receptor interactions can be translated to the design of more~~  
1629 ~~effective targeting domains for synthetic carriers.~~ Additionally, some viruses (such as the adenovirus)

Formatted: Not Highlight

## Virus Structure and Mechanism Inform the Design of Nucleic Acid Delivery Systems

1630 ~~have been found to exploit cellular responses to membrane disruption concurrent with membrane~~  
1631 ~~fusion or penetration (Staring, Raaben, and Brummelkamp et al. 2018). In this light, future synthetic~~  
1632 ~~carriers may also be tailored to utilize host damage control to enhance therapeutic delivery. For this~~  
1633 ~~to be an effective strategy, it is imperative that the sensing of and response to invading particles by the~~  
1634 ~~host cell be exhaustively studied. (Staring, Raaben, and Brummelkamp 2018) As uptake mechanisms~~  
1635 ~~typically involve signaling cascades, their relationship with intracellular trafficking are important~~  
1636 ~~considerations.~~

1637  
1638 ~~Viral mimicry and the development of nucleic acid vectors iterate with our understanding of viral~~  
1639 ~~mechanism. Accordingly, advancements in techniques that identify viral ligands and corresponding~~  
1640 ~~host receptors, interrogate structure, and probe dynamics of ligand receptor interactions can be~~  
1641 ~~translated to the design of more effective targeting domains for synthetic carriers. As uptake~~  
1642 ~~mechanisms typically involve signaling cascades, their relationship with intracellular trafficking are~~  
1643 ~~important considerations.~~

1644 ~~Quantitative and qualitative assays have been developed to track the intracellular fate of carriers. Such~~  
1645 ~~techniques are commonly based on electron (Gilleron et al. 2013) and fluorescence microscopy (Lönn~~  
1646 ~~et al. 2016; Du Rietz et al. 2020; Kilechrist et al. 2019) and have provided valuable insights on~~  
1647 ~~trafficking and transfection efficiency (Juliano 2018). Furthermore, the lack of quantitative techniques~~  
1648 ~~to directly measure cytosolic delivery (Lönn et al. 2016) has motivated recent works to establish~~  
1649 ~~universal platforms that precisely calculate endosomal escape efficiency (Gilleron et al. 2013; Lönn et~~  
1650 ~~al. 2016) and correlate endosomal disruption with transfection efficiency (Du Rietz et al. 2020;~~  
1651 ~~Kilechrist et al. 2019). Additionally, the implication of recycling pathways in viral and non viral~~  
1652 ~~cytosolic access (Carette et al. 2011; Sahay et al. 2013; Haitang Wang et al. 2016) suggests further~~  
1653 ~~studies on their exact role in therapeutic delivery. Quantitative and qualitative assays have been~~  
1654 ~~developed to track the intracellular fate of carriers. Such techniques are commonly based on electron~~  
1655 ~~(Gilleron et al. 2013) and fluorescence microscopy (Lönn et al. 2016; Du Rietz et al. 2020; Kilechrist et~~  
1656 ~~al. 2019) and have provided valuable insights on trafficking and transfection efficiency (Juliano 2018).~~  
1657 ~~Furthermore, the lack of quantitative techniques to directly measure cytosolic delivery (Lönn et al.~~  
1658 ~~2016) has motivated recent works to establish universal platforms that precisely calculate endosomal~~  
1659 ~~escape efficiency (Gilleron et al. 2013; Lönn et al. 2016) and correlate endosomal disruption with~~  
1660 ~~transfection efficiency (Du Rietz et al. 2020; Kilechrist et al. 2019). Additionally, the implication of~~  
1661 ~~recycling pathways in viral and non viral cytosolic access (Carette et al. 2011; Sahay et al. 2013; H.~~  
1662 ~~Wang et al. 2016) suggests further studies on their exact role in therapeutic delivery.~~

1663 ~~Finally, nuclear delivery presents an additional task for nuclear targeted cargo. Although ultrasmall~~  
1664 ~~particles (16 nm or less) undergo passive diffusion, many therapeutic nano vehicles are larger than the~~  
1665 ~~size of the nuclear pore complex (NPC, L. Pan, Liu, and ShiPan et al. 2018). Thus, nuclear targeted~~  
1666 ~~carriers incorporate an NLS peptide or DTS to target the vector towards the nucleus of the cell.~~  
1667 ~~Although these targeting domains are derived from nuclear viruses, it may be important to mimic how~~  
1668 ~~viruses present them. In particular, the unmasking of NLS peptide in case of SV40 and HIV virus only~~  
1669 ~~when it is needed reduces the off target binding and increases the karyopherin mediated uptake~~  
1670 ~~(Fanales-Belasio et al. 2010; Nakanishi et al. 2002). On the other hand, the kinesin light chain helps~~  
1671 ~~adenovirus to uncoat at the NPC and release just the viral genome instead of whole/disassembled capsid~~  
1672 ~~bound viral genome. These kinds of smart techniques can be explored further as current synthetic~~  
1673 ~~carriers are designed to deliver the whole construct to the nucleus and not just the nucleic acid cargo~~

Formatted: Font color: Auto

Formatted: Indent: First line: 0"



## Virus Structure and Mechanism Inform the Design of Nucleic Acid Delivery Systems

1674 [\(Hu et al. 2012; M. T. de P. Favaro et al. 2018\)](#). [By balancing genome protection and controlled release](#)  
1675 [within or near the nucleus, toxic and off target effects can be reduced](#) [\(J. Yao et al. 2013\)](#).

1676 [Moreover, other nuclear targeting ligands that have been used for the delivery of proteins are yet to be](#)  
1677 [explored for nucleic acid delivery. As an example, Tang et al. \(R. Tang et al. 2017\) have explored the](#)  
1678 [nucleus targeting ability of boronate tagged proteins. Proteins synthetically modified with a simple](#)  
1679 [aromatic boronate motif undergo both active and passive nuclear uptake. Passive uptake is due to](#)  
1680 [hydrophobic interaction of the aromatic ring of the motif with the NPC whereas active transport is](#)  
1681 [through karyopherin  \$\alpha/\beta\$  pathway. As compared to peptides and oligonucleotide ligands that are prone](#)  
1682 [to enzymatic degradation, this small molecule ligand opens up new targeting strategies. With respect](#)  
1683 [to oligonucleotides, these benzyl boronate tags can be conjugated to gene encapsulating vectors by](#)  
1684 [directly attaching it to the benzyl ring or by conjugating to the gene itself. Such emerging tools for](#)  
1685 [nucleus targeting present opportunities for enhancing and diversifying strategies for the nuclear](#)  
1686 [delivery of therapeutic nucleic acids. In summary, viruses can serve as a source of inspiration for](#)  
1687 [chemists and materials scientists alike in the design considerations of non-viral vectors due to their](#)  
1688 [efficient uptake and delivery of nucleic acid cargo. By designing nanoscale materials with stimuli-](#)  
1689 [responsive properties and efficient targeting and internalization, therapeutic nucleic acids can be more](#)  
1690 [rapidly brought forward for clinical application.](#)

1691 [Nuclear targeting and entry present an additional task for nucleus targeted cargo. Current strategies](#)  
1692 [are limited to either passive diffusion or the use of proteins or peptides that direct the cargo to the](#)  
1693 [nucleus via importin dependent or independent pathways. Emerging tools for nucleus targeting and](#)  
1694 [selective release present opportunities for enhancing and diversifying strategies for nuclear delivery of](#)  
1695 [therapeutic nucleic acids.](#)

### 1696 **57** Author Contributions

1697 [All authors have contributed to the design and writing of this work and have approved it for publication.](#)

### 1698 **68** Contribution to the Field

1699 [The delivery of therapeutic nucleic acids into cells is an area of growing interest in the medical and](#)  
1700 [pharmaceutical fields. Despite the immense potential of these biological molecules to treat diseases](#)  
1701 [through gene regulation, they have proven challenging to translate clinically. This review seeks to](#)  
1702 [provide examples of how chemical and biochemical mechanisms by which viruses enter host cells can](#)  
1703 [serve as a design template for non-viral nucleic acid delivery. Specifically, how viruses engage cell](#)  
1704 [membranes is reviewed, along with current synthetic formulations for delivering RNA and DNA that](#)  
1705 [find inspiration in various ways from viruses. The main bottlenecks to the successful delivery of active](#)  
1706 [nucleic acids into cells, that of cell-specific targeting and endosomal escape, are discussed alongside](#)  
1707 [the mechanisms by which viruses overcome such barriers. The delivery of therapeutic nucleic acids](#)  
1708 [into cells is an area of growing interest in](#)

### 1709 **79** References

1710 [Abri Aghdam, Marjan, Roya Bagheri, Jafar Mosafer, Behzad Baradaran, Mahmoud Hashemzaei,](#)  
1711 [Amir Baghbanzadeh, Miguel de la Guardia, and Ahad Mokhtarzadeh. 2019. "Recent](#)  
1712 [Advances on Thermosensitive and PH-Sensitive Liposomes Employed in Controlled](#)  
1713 [Release." \*Journal of Controlled Release\* 315 \(December\): 1–22.](#)  
1714 <https://doi.org/10.1016/j.jconrel.2019.09.018>.

Formatted: Font color: Auto

Formatted: Justified

Formatted: Font:

## Virus Structure and Mechanism Inform the Design of Nucleic Acid Delivery Systems

- 1715 [Adams, David, Alejandra Gonzalez-Duarte, William D. O’Riordan, Chih-Chao Yang, Mitsuharu](#)  
1716 [Ueda, Arnt V. Kristen, Ivailo Tournev, et al. 2018. “Patisiran, an RNAi Therapeutic, for](#)  
1717 [Hereditary Transthyretin Amyloidosis.” \*The New England Journal of Medicine\* 379 \(1\): 11–](#)  
1718 [21. <https://doi.org/10.1056/NEJMoa1716153>.](#)
- 1719 [Akinc, Akin, William Querbes, Soma De, June Qin, Maria Frank-Kamenetsky, K. Narayanannair](#)  
1720 [Jayaprakash, Muthusamy Jayaraman, et al. 2010. “Targeted Delivery of RNAi Therapeutics](#)  
1721 [With Endogenous and Exogenous Ligand-Based Mechanisms.” \*Molecular Therapy\* 18 \(7\):](#)  
1722 [1357–64. <https://doi.org/10.1038/mt.2010.85>.](#)
- 1723 [Alam, Md Rowshon, Vidula Dixit, Hyunmin Kang, Zi-Bo Li, Xiaoyuan Chen, JoAnn Trejo, Michael](#)  
1724 [Fisher, and Rudy L. Juliano. 2008. “Intracellular Delivery of an Anionic Antisense](#)  
1725 [Oligonucleotide via Receptor-Mediated Endocytosis.” \*Nucleic Acids Research\* 36 \(8\): 2764–](#)  
1726 [76. <https://doi.org/10.1093/nar/gkn115>.](#)
- 1727 [Aleksandrowicz, Paulina, Andrea Marzi, Nadine Biedenkopf, Nadine Beimforde, Stephan Becker,](#)  
1728 [Thomas Hoenen, Heinz Feldmann, and Hans-Joachim Schnittler. 2011. “Ebola Virus Enters](#)  
1729 [Host Cells by Macropinocytosis and Clathrin-Mediated Endocytosis.” \*The Journal of\*](#)  
1730 [Infectious Diseases 204 \(Suppl 3\): S957–67. <https://doi.org/10.1093/infdis/jir326>.](#)
- 1731 [Alipour, Mohsen, Saman Hosseinkhani, Reza Sheikhejad, and Roya Cheraghi. 2017. “Nano-](#)  
1732 [Biomimetic Carriers Are Implicated in Mechanistic Evaluation of Intracellular Gene](#)  
1733 [Delivery.” \*Scientific Reports\* 7 \(1\): 41507. <https://doi.org/10.1038/srep41507>.](#)
- 1734 [Ämmälä, C., W. J. Drury, L. Knerr, I. Ahlstedt, P. Stillemark-Billton, C. Wennberg-Huldt, E.-M.](#)  
1735 [Andersson, et al. 2018. “Targeted Delivery of Antisense Oligonucleotides to Pancreatic  \$\beta\$ -](#)  
1736 [Cells.” \*Science Advances\* 4 \(10\): eaat3386. <https://doi.org/10.1126/sciadv.aat3386>.](#)
- 1737 [Anyarambhatla, Gopal R., and David Needham. 1999. “Enhancement of the Phase Transition](#)  
1738 [Permeability of DPPC Liposomes by Incorporation of MPPC: A New Temperature-Sensitive](#)  
1739 [Liposome for Use with Mild Hyperthermia.” \*Journal of Liposome Research\* 9 \(4\): 491–506.](#)  
1740  [<https://doi.org/10.3109/08982109909035549>.](#)
- 1741 [Arana, Lide, Laura Bayón-Cordero, Laura Isabel Sarasola, Miren Berasategi, Sandra Ruiz, and Itziar](#)  
1742 [Alkorta. 2019. “Solid Lipid Nanoparticles Surface Modification Modulates Cell](#)  
1743 [Internalization and Improves Chemotoxic Treatment in an Oral Carcinoma Cell Line.”](#)  
1744  [\*Nanomaterials\* 9 \(3\). <https://doi.org/10.3390/nano9030464>.](#)
- 1745 [Arimaminpathy, Nimalan, and Bryan Grenfell. 2010. “Dynamics of Glycoprotein Charge in the](#)  
1746 [Evolutionary History of Human Influenza.” \*PLoS ONE\* 5 \(12\).](#)  
1747  [<https://doi.org/10.1371/journal.pone.0015674>.](#)
- 1748 [Asai, Tomohiro, Saori Matsushita, Eriya Kenjo, Takuma Tsuzuku, Norihito Yonenaga, Hiroyuki](#)  
1749 [Koide, Kentaro Hatanaka, et al. 2011. “Dicetyl Phosphate-Tetraethylenepentamine-Based](#)  
1750 [Liposomes for Systemic SiRNA Delivery.” \*Bioconjugate Chemistry\* 22 \(3\): 429–35.](#)  
1751  [<https://doi.org/10.1021/bc1004697>.](#)
- 1752 [Ashley, Carlee E., Eric C. Carnes, Genevieve K. Phillips, Paul N. Durfee, Mekensey D. Buley,](#)  
1753 [Christopher A. Lino, David P. Padilla, et al. 2011. “Cell-Specific Delivery of Diverse Cargos](#)  
1754 [by Bacteriophage MS2 Virus-like Particles.” \*ACS Nano\* 5 \(7\): 5729–45.](#)  
1755  [<https://doi.org/10.1021/nn201397z>.](#)
- 1756 [Awino, Joseph K., Saketh Gudipati, Alyssa K. Hartmann, Joshua J. Santiana, Dominic F. Cairns-](#)  
1757 [Gibson, Nicole Gomez, and Jessica L. Rouge. 2017. “Nucleic Acid Nanocapsules for](#)

## Virus Structure and Mechanism Inform the Design of Nucleic Acid Delivery Systems

- 1758 [Enzyme-Triggered Drug Release.” \*Journal of the American Chemical Society\* 139 \(18\):](#)  
1759 [6278–81. <https://doi.org/10.1021/jacs.6b13087>.](#)
- 1760 [Bai, Haiqing, Gillian M. Schiralli Lester, Laura C. Petishnok, and David A. Dean. 2017.](#)  
1761 [“Cytoplasmic Transport and Nuclear Import of Plasmid DNA.” \*Bioscience Reports\* 37](#)  
1762 [\(BSR20160616\). <https://doi.org/10.1042/BSR20160616>.](#)
- 1763 [Banerjee, Rajkumar, Pradeep Tyagi, Song Li, and Leaf Huang. 2004. “Anisamide-Targeted Stealth](#)  
1764 [Liposomes: A Potent Carrier for Targeting Doxorubicin to Human Prostate Cancer Cells.”](#)  
1765 [\*International Journal of Cancer\* 112 \(4\): 693–700. <https://doi.org/10.1002/ijc.20452>.](#)
- 1766 [Banga, Resham J., Natalia Chernyak, Suguna P. Narayan, SonBinh T. Nguyen, and Chad A. Mirkin.](#)  
1767 [2014. “Liposomal Spherical Nucleic Acids.” \*Journal of the American Chemical Society\* 136](#)  
1768 [\(28\): 9866–69. <https://doi.org/10.1021/ja504845f>.](#)
- 1769 [Banga, Resham J., Brian Meckes, Suguna P. Narayan, Anthony J. Sprangers, SonBinh T. Nguyen,](#)  
1770 [and Chad A. Mirkin. 2017. “Cross-Linked Micellar Spherical Nucleic Acids from](#)  
1771 [Thermoresponsive Templates.” \*Journal of the American Chemical Society\* 139 \(12\): 4278–81.](#)  
1772  [<https://doi.org/10.1021/jacs.6b13359>.](#)
- 1773 [Barba, Anna Angela, Sabrina Bochicchio, Annalisa Dalmoro, and Gaetano Lamberti. 2019. “Lipid](#)  
1774 [Delivery Systems for Nucleic-Acid-Based-Drugs: From Production to Clinical Applications.”](#)  
1775 [\*Pharmaceutics\* 11 \(8\). <https://doi.org/10.3390/pharmaceutics11080360>.](#)
- 1776 [Barrow, Eric, Anthony V Nicola, and Jin Liu. 2013. “Multiscale Perspectives of Virus Entry via](#)  
1777 [Endocytosis.” \*Virology Journal\* 10 \(June\): 177. <https://doi.org/10.1186/1743-422X-10-177>.](#)
- 1778 [Beniac, Daniel R., Pasquale L. Melito, Shauna L. deVarennes, Shannon L. Hiebert, Melissa J. Rabb,](#)  
1779 [Lindsey L. Lamboo, Steven M. Jones, and Timothy F. Booth. 2012. “The Organisation of](#)  
1780 [Ebola Virus Reveals a Capacity for Extensive, Modular Polyploidy.” \*PLOS ONE\* 7 \(1\):](#)  
1781 [e29608. <https://doi.org/10.1371/journal.pone.0029608>.](#)
- 1782 [Brandenburg, Boerries, Lars Stockl, Cindy Gutzeit, Martin Roos, Joachim Lupberger, Ruth](#)  
1783 [Schwartlander, Hans Gelderblom, Igor M. Sauer, Peter Hans Hofschneider, and Eberhard](#)  
1784 [Hildt. 2005. “A Novel System for Efficient Gene Transfer into Primary Human Hepatocytes](#)  
1785 [via Cell-Permeable Hepatitis B Virus-like Particle.” \*Hepatology\* 42 \(6\): 1300–1309.](#)  
1786  [<https://doi.org/10.1002/hep.20950>.](#)
- 1787 [Breuzard, Gilles, Magdalena Tertit, Cristine Gonçalves, Hervé Cheradame, Philippe Géguan, Chantal](#)  
1788 [Pichon, and Patrick Midoux. 2008. “Nuclear Delivery of NFκB-Assisted DNA/Polymer](#)  
1789 [Complexes: Plasmid DNA Quantitation by Confocal Laser Scanning Microscopy and](#)  
1790 [Evidence of Nuclear Polyplexes by FRET Imaging.” \*Nucleic Acids Research\* 36 \(12\): e71.](#)  
1791  [<https://doi.org/10.1093/nar/gkn287>.](#)
- 1792 [Brodin, Jeffrey D., Anthony J. Sprangers, Janet R. McMillan, and Chad A. Mirkin. 2015. “DNA-](#)  
1793 [Mediated Cellular Delivery of Functional Enzymes.” \*Journal of the American Chemical\*](#)  
1794  [\*Society\* 137 \(47\): 14838–41. <https://doi.org/10.1021/jacs.5b09711>.](#)
- 1795 [Budker, Vladimir, Vladimir Gurevich, James E. Hagstrom, Fedor Bortzov, and Jon A. Wolff. 1996.](#)  
1796 [“PH-Sensitive, Cationic Liposomes: A New Synthetic Virus-like Vector.” \*Nature\*](#)  
1797  [\*Biotechnology\* 14 \(6\): 760–64. <https://doi.org/10.1038/nbt0696-760>.](#)
- 1798 [Bukrinsky, Michael. 2004. “A Hard Way to the Nucleus.” \*Molecular Medicine\* 10 \(1–6\): 1–5.](#)
- 1799 [Burckhardt, Christoph J., Maarit Suomalainen, Philipp Schoenenberger, Karin Boucke, Silvio](#)  
1800 [Hemmi, and Urs F. Greber. 2011a. “Drifting Motions of the Adenovirus Receptor CAR and](#)

## Virus Structure and Mechanism Inform the Design of Nucleic Acid Delivery Systems

- 1801 [Immobile Integrins Initiate Virus Uncoating and Membrane Lytic Protein Exposure.](#) *Cell*  
1802 [Host & Microbe](#) 10 (2): 105–17. <https://doi.org/10.1016/j.chom.2011.07.006>.
- 1803 [Burekhardt, Christoph J., Maarit Suomalainen, Philipp Schoenenberger, Karin Boueke, Silvio](#)  
1804 [Hemmi, and Urs F. Greber. 2011b. “Drifting Motions of the Adenovirus Receptor CAR and](#)  
1805 [Immobile Integrins Initiate Virus Uncoating and Membrane Lytic Protein Exposure.”](#) *Cell*  
1806 [Host & Microbe](#) 10 (2): 105–17. <https://doi.org/10.1016/j.chom.2011.07.006>.
- 1807 [Burger, Nina, Abin Biswas, Daniel Barzan, Anne Kirchner, Hiltraud Hosser, Michael Hausmann,](#)  
1808 [Georg Hildenbrand, Carsten Herskind, Frederik Wenz, and Marlon R. Veldwijk. 2014. “A](#)  
1809 [Method for the Efficient Cellular Uptake and Retention of Small Modified Gold](#)  
1810 [Nanoparticles for the Radiosensitization of Cells.”](#) *Nanomedicine: Nanotechnology, Biology*  
1811 [and Medicine](#) 10 (6): 1365–73. <https://doi.org/10.1016/j.nano.2014.03.011>.
- 1812 [Burgess, Kevin. 2001. “Solid-Phase Syntheses of  \$\beta\$ -Turn Analogues To Mimic or Disrupt](#)  
1813 [Protein–Protein Interactions.”](#) *Accounts of Chemical Research* 34 (10): 826–35.  
1814 <https://doi.org/10.1021/ar9901523>.
- 1815 [Burri, Dominique J., Joel Ramos da Palma, Stefan Kunz, and Antonella Pasquato. 2012. “Envelope](#)  
1816 [Glycoprotein of Arenaviruses.”](#) *Viruses* 4 (10): 2162–81. <https://doi.org/10.3390/v4102162>.
- 1817 [Cai, Xiaoqing, Hsiang-Hsin Chen, Cheng-Liang Wang, Shin-Tai Chen, Sheng-Feng Lai, Chia-Chi](#)  
1818 [Chien, Yi-Yun Chen, et al. 2011. “Imaging the Cellular Uptake of Tiopronin-Modified Gold](#)  
1819 [Nanoparticles.”](#) *Analytical and Bioanalytical Chemistry* 401 (3): 809–16.  
1820 <https://doi.org/10.1007/s00216-011-4986-3>.
- 1821 [Callaway, Ewen. 2020. “The Race for Coronavirus Vaccines: A Graphical Guide.”](#) *Nature* 580  
1822 [\(7805\): 576–77.](#) <https://doi.org/10.1038/d41586-020-01221-y>.
- 1823 [Cao, W., M. D. Henry, P. Borrow, H. Yamada, J. H. Elder, E. V. Ravkov, S. T. Nichol, R. W.](#)  
1824 [Compans, K. P. Campbell, and M. B. Oldstone. 1998. “Identification of Alpha-Dystroglycan](#)  
1825 [as a Receptor for Lymphocytic Choriomeningitis Virus and Lassa Fever Virus.”](#) *Science (New*  
1826 [York, N.Y.\)](#) 282 (5396): 2079–81. <https://doi.org/10.1126/science.282.5396.2079>.
- 1827 [Carette, Jan E., Matthijs Raaben, Anthony C. Wong, Andrew S. Herbert, Gregor Obernosterer,](#)  
1828 [Nirupama Mulherkar, Ana I. Kuehne, et al. 2011. “Ebola Virus Entry Requires the](#)  
1829 [Cholesterol Transporter Niemann-Pick C1.”](#) *Nature* 477 (7364): 340–43.  
1830 <https://doi.org/10.1038/nature10348>.
- 1831 [Cartier, R., and R. Reszka. 2002. “Utilization of Synthetic Peptides Containing Nuclear Localization](#)  
1832 [Signals for Nonviral Gene Transfer Systems.”](#) *Gene Therapy* 9 (3): 157–67.  
1833 <https://doi.org/10.1038/sj.gt.3301635>.
- 1834 [Chan, David C., Deborah Fass, James M. Berger, and Peter S. Kim. 1997. “Core Structure of Gp41](#)  
1835 [from the HIV Envelope Glycoprotein.”](#) *Cell* 89 (2): 263–73. [https://doi.org/10.1016/S0092-](https://doi.org/10.1016/S0092-8674(00)80205-6)  
1836 [8674\(00\)80205-6](#).
- 1837 [Chang, Kai-Ling, Yuriko Higuchi, Shigeru Kawakami, Fumiyoshi Yamashita, and Mitsuru Hashida.](#)  
1838 [2010. “Efficient Gene Transfection by Histidine-Modified Chitosan through Enhancement of](#)  
1839 [Endosomal Escape.”](#) *Bioconjugate Chemistry* 21 (6): 1087–95.  
1840 <https://doi.org/10.1021/bc1000609>.
- 1841 [Chernomordik, L., M. M. Kozlov, and J. Zimmerberg. 1995. “Lipids in Biological Membrane](#)  
1842 [Fusion.”](#) *The Journal of Membrane Biology* 146 (1): 1–14.  
1843 <https://doi.org/10.1007/BF00232676>.

## Virus Structure and Mechanism Inform the Design of Nucleic Acid Delivery Systems

- 1844 [Chery, Jessica. 2016. "RNA Therapeutics: RNAi and Antisense Mechanisms and Clinical](#)  
1845 [Applications." \*Postdoc Journal : A Journal of Postdoctoral Research and Postdoctoral\*](#)  
1846 [Affairs 4 \(7\): 35–50. <https://10.14304/surya.jpr.v4n7.5>.](#)
- 1847 [Choi, Chung Hang J., Liangliang Hao, Suguna P. Narayan, Evelyn Auyeung, and Chad A. Mirkin.](#)  
1848 [2013. "Mechanism for the Endocytosis of Spherical Nucleic Acid Nanoparticle Conjugates."](#)  
1849 [\*Proceedings of the National Academy of Sciences\* 110 \(19\): 7625–30.](#)  
1850 [https://doi.org/10.1073/pnas.1305804110.](#)
- 1851 [Cohen, Ohad, and Rony Granek. 2014. "Nucleus-Targeted Drug Delivery: Theoretical Optimization](#)  
1852 [of Nanoparticles Decoration for Enhanced Intracellular Active Transport." \*Nano Letters\* 14](#)  
1853 [\(5\): 2515–21. <https://doi.org/10.1021/nl500248q>.](#)
- 1854 [Cohen, Richard N., Marieke A. E. M. van der Aa, Nichole Macaraeg, Ai Ping Lee, and Francis C.](#)  
1855 [Szoka. 2009. "Quantification of Plasmid DNA Copies in the Nucleus after Lipoplex and](#)  
1856 [Polyplex Transfection." \*Journal of Controlled Release\* 135 \(2\): 166–74.](#)  
1857 [https://doi.org/10.1016/j.jconrel.2008.12.016.](#)
- 1858 [Cohen, Sarah, Shelly Au, and Nelly Panté. 2011. "How Viruses Access the Nucleus." \*Biochimica et\*](#)  
1859 [Biophysica Acta \(BBA\) - Molecular Cell Research](#) 1813 (9): 1634–45.  
1860 [https://doi.org/10.1016/j.bbamcr.2010.12.009.](#)
- 1861 [Cohen-Dvashi, Hadas, Nadav Cohen, Hadar Israeli, and Ron Diskin. 2015. "Molecular Mechanism](#)  
1862 [for LAMP1 Recognition by Lassa Virus." \*Journal of Virology\* 89 \(15\): 7584–92.](#)  
1863 [https://doi.org/10.1128/JVI.00651-15.](#)
- 1864 [Cohen-Dvashi, Hadas, Hadar Israeli, Orly Shani, Aliza Katz, and Ron Diskin. 2016. "Role of](#)  
1865 [LAMP1 Binding and PH Sensing by the Spike Complex of Lassa Virus." \*Journal of Virology\*](#)  
1866 [90 \(22\): 10329–38. <https://doi.org/10.1128/JVI.01624-16>.](#)
- 1867 [Corbett, Kizzmekia S., Darin Edwards, Sarah R. Leist, Olubukola M. Abiona, Seyhan Boyoglu-](#)  
1868 [Barnum, Rebecca A. Gillespie, Sunny Himansu, et al. 2020. "SARS-CoV-2 mRNA Vaccine](#)  
1869 [Development Enabled by Prototype Pathogen Preparedness." \*BioRxiv\*, June.](#)  
1870 [https://doi.org/10.1101/2020.06.11.145920.](#)
- 1871 [Corey, David R. 2007. "Chemical Modification: The Key to Clinical Application of RNA](#)  
1872 [Interference?" \*Journal of Clinical Investigation\* 117 \(12\): 3615–22.](#)  
1873 [https://doi.org/10.1172/JCI33483.](#)
- 1874 [Côté, Marceline, John Misasi, Tao Ren, Anna Bruchez, Kyungae Lee, Claire Marie Filone, Lisa](#)  
1875 [Hensley, et al. 2011. "Small Molecule Inhibitors Reveal Niemann-Pick C1 Is Essential for](#)  
1876 [Ebola virus Infection." \*Nature\* 477 \(7364\): 344–48. <https://doi.org/10.1038/nature10380>.](#)
- 1877 [Couch, Robert B. 1996. "Orthomyxoviruses." In \*Medical Microbiology\*, edited by Samuel Baron. 4th](#)  
1878 [ed. Galveston \(TX\): University of Texas Medical Branch at Galveston.](#)  
1879 [http://www.ncbi.nlm.nih.gov/books/NBK8611/.](#)
- 1880 [Crews, Craig M. 2010. "Targeting the Undruggable Proteome: The Small Molecules of My Dreams." \*Journal of\*](#)  
1881 [Chemistry & Biology](#) 17 (6): 551–55. <https://doi.org/10.1016/j.chembiol.2010.05.011>.
- 1882 [Cros, Jerome F, and Peter Palese. 2003. "Trafficking of Viral Genomic RNA into and out of the](#)  
1883 [Nucleus: Influenza, Thogoto and Borna Disease Viruses." \*Virus Research\*. Nuclear Functions](#)  
1884 [of RNA Virus Proteins, 95 \(1\): 3–12. \[https://doi.org/10.1016/S0168-1702\\(03\\)00159-X\]\(https://doi.org/10.1016/S0168-1702\(03\)00159-X\).](#)



## Virus Structure and Mechanism Inform the Design of Nucleic Acid Delivery Systems

- 1885 [Cruz-Acuña, Melissa, Justin R. Halman, Kirill A. Afonin, Jon Dobson, and Carlos Rinaldi. 2018.](#)  
1886 [“Magnetic Nanoparticles Loaded with Functional RNA Nanoparticles.” \*Nanoscale\* 10 \(37\):](#)  
1887 [17761–70. <https://doi.org/10.1039/C8NR04254C>.](#)
- 1888 [Cui, Shao-Hui, De-Fu Zhi, Yi-Nan Zhao, Hui-Ying Chen, Yao Meng, Chuan-Min Zhang, and Shu-](#)  
1889 [Biao Zhang. 2016. “Cationic Liposomes with Folic Acid as Targeting Ligand for Gene](#)  
1890 [Delivery.” \*Bioorganic & Medicinal Chemistry Letters\* 26 \(16\): 4025–29.](#)  
1891 [<https://doi.org/10.1016/j.bmcl.2016.06.085>.](#)
- 1892 [Cutler, Joshua I., Evelyn Auyeung, and Chad A. Mirkin. 2012. “Spherical Nucleic Acids.” \*Journal of\*](#)  
1893 [the American Chemical Society 134 \(3\): 1376–91. <https://doi.org/10.1021/ja209351u>.](#)
- 1894 [Cutler, Joshua I., Ke Zhang, Dan Zheng, Evelyn Auyeung, Andrew E. Prigodich, and Chad A.](#)  
1895 [Mirkin. 2011. “Polyvalent Nucleic Acid Nanostructures.” \*Journal of the American Chemical\*](#)  
1896 [Society 133 \(24\): 9254–57. <https://doi.org/10.1021/ja203375n>.](#)
- 1897 [Cutler, Joshua I., Dan Zheng, Xiaoyang Xu, David A. Giljohann, and Chad A. Mirkin. 2010.](#)  
1898 [“Polyvalent Oligonucleotide Iron Oxide Nanoparticle ‘Click’ Conjugates.” \*Nano Letters\* 10](#)  
1899 [\(4\): 1477–80. <https://doi.org/10.1021/nl100477m>.](#)
- 1900 [Dalmau-Mena, Inmaculada, Pablo del Pino, Beatriz Pelaz, Miguel Ángel Cuesta-Gejjo, Inmaculada](#)  
1901 [Galindo, María Moros, Jesús M. de la Fuente, and Covadonga Alonso. 2018. “Nanoparticles](#)  
1902 [Engineered to Bind Cellular Motors for Efficient Delivery.” \*Journal of Nanobiotechnology\* 16](#)  
1903 [\(1\): 33. <https://doi.org/10.1186/s12951-018-0354-1>.](#)
- 1904 [Danhier, Fabienne, Aude Le Breton, and Véronique Préat. 2012. “RGD-Based Strategies To Target](#)  
1905 [Alpha\(v\) Beta\(3\) Integrin in Cancer Therapy and Diagnosis.” Review-article. \*American\*](#)  
1906 [Chemical Society. World, October 4, 2012. <https://doi.org/10.1021/mp3002733>.](#)
- 1907 [Dassie, Justin P., and Paloma H. Giangrande. 2013. “Current Progress on Aptamer-Targeted](#)  
1908 [Oligonucleotide Therapeutics.” \*Therapeutic Delivery\* 4 \(12\): 1527–46.](#)  
1909 [<https://doi.org/10.4155/tde.13.118>.](#)
- 1910 [Debacker, Alexandre J., Jon Voutila, Matthew Catley, David Blakey, and Nagy Habib. 2020.](#)  
1911 [“Delivery of Oligonucleotides to the Liver with GalNAc: From Research to Registered](#)  
1912 [Therapeutic Drug.” \*Molecular Therapy\* 28 \(8\): 1759–71.](#)  
1913 [<https://doi.org/10.1016/j.ymthe.2020.06.015>.](#)
- 1914 [Ding, Fei, Xihui Gao, Xiangang Huang, Huan Ge, Miao Xie, Jiwen Qian, Jie Song, Yuehua Li,](#)  
1915 [Xinyuan Zhu, and Chuan Zhang. 2020. “Polydopamine-Coated Nucleic Acid Nanogel for](#)  
1916 [SiRNA-Mediated Low-Temperature Photothermal Therapy.” \*Biomaterials\* 245 \(July\):](#)  
1917 [119976. <https://doi.org/10.1016/j.biomaterials.2020.119976>.](#)
- 1918 [Ding, Fei, Xiangang Huang, Xihui Gao, Miao Xie, Gaifang Pan, Qifeng Li, Jie Song, Xinyuan Zhu,](#)  
1919 [and Chuan Zhang. 2019. “A Non-Cationic Nucleic Acid Nanogel for the Delivery of the](#)  
1920 [CRISPR/Cas9 Gene Editing Tool.” \*Nanoscale\* 11 \(37\): 17211–15.](#)  
1921 [<https://doi.org/10.1039/C9NR05233J>.](#)
- 1922 [Ding, Fei, Quanbing Mou, Yuan Ma, Gaifang Pan, Yuanyuan Guo, Gangsheng Tong, Chung Hang](#)  
1923 [Jonathan Choi, Xinyuan Zhu, and Chuan Zhang. 2018. “A Crosslinked Nucleic Acid Nanogel](#)  
1924 [for Effective SiRNA Delivery and Antitumor Therapy.” \*Angewandte Chemie International\*](#)  
1925 [Edition 57 \(12\): 3064–68. <https://doi.org/10.1002/anie.201711242>.](#)

## Virus Structure and Mechanism Inform the Design of Nucleic Acid Delivery Systems

- 1926 [Ding, Ya, Ziwen Jiang, Krishnendu Saha, Chang Soo Kim, Sung Tae Kim, Ryan F Landis, and](#)  
1927 [Vincent M Rotello. 2014. "Gold Nanoparticles for Nucleic Acid Delivery." \*Molecular\*](#)  
1928 [Therapy 22 \(6\): 1075–83. <https://doi.org/10.1038/mt.2014.30>.](#)
- 1929 [Döhner, Katinka, Claus-Henning Nagel, and Beate Sodeik. 2005. "Viral Stop-and-Go along](#)  
1930 [Microtubules: Taking a Ride with Dynein and Kinesins." \*Trends in Microbiology\* 13 \(7\):](#)  
1931 [320–27. <https://doi.org/10.1016/j.tim.2005.05.010>.](#)
- 1932 [Dong, Yiwen, Tianzhu Yu, Ling Ding, Erik Laurini, Yuanyu Huang, Mengjie Zhang, Yuhua Weng,](#)  
1933 [et al. 2018. "A Dual Targeting Dendrimer-Mediated siRNA Delivery System for Effective](#)  
1934 [Gene Silencing in Cancer Therapy." \*Journal of the American Chemical Society\* 140 \(47\):](#)  
1935 [16264–74. <https://doi.org/10.1021/jacs.8b10021>.](#)
- 1936 [Dowaidar, Moataz, Hani Nasser Abdelhamid, Mattias Hällbrink, Krista Freimann, Kaido Kurrikoff,](#)  
1937 [Xiaodong Zou, and Ülo Langel. 2017. "Magnetic Nanoparticle Assisted Self-Assembly of](#)  
1938 [Cell Penetrating Peptides-Oligonucleotides Complexes for Gene Delivery." \*Scientific Reports\*](#)  
1939 [7 \(1\): 9159. <https://doi.org/10.1038/s41598-017-09803-z>.](#)
- 1940 [Dowdy, Steven F. 2017. "Overcoming Cellular Barriers for RNA Therapeutics." \*Nature\*](#)  
1941 [Biotechnology 35 \(3\): 222–29. <https://doi.org/10.1038/nbt.3802>.](#)
- 1942 [Dowdy, Steven F., and Matthew Levy. 2018. "RNA Therapeutics \(Almost\) Comes of Age:](#)  
1943 [Targeting, Delivery and Endosomal Escape." \*Nucleic Acid Therapeutics\* 28 \(3\): 107–8.](#)  
1944  [<https://doi.org/10.1089/nat.2018.29001.dow>.](#)
- 1945 [Du Rietz, Hampus, Hampus Hedlund, Sten Wilhelmson, Pontus Nordenfelt, and Anders Wittrup.](#)  
1946 [2020. "Imaging Small Molecule-Induced Endosomal Escape of siRNA." \*Nature\*](#)  
1947 [Communications 11 \(1\): 1809. <https://doi.org/10.1038/s41467-020-15300-1>.](#)
- 1948 [Duffy, Michael J., and John Crown. 2021. "Drugging 'Undruggable' Genes for Cancer Treatment:](#)  
1949 [Are We Making Progress?" \*International Journal of Cancer\* 148 \(1\): 8–17.](#)  
1950  [<https://doi.org/10.1002/ijc.33197>.](#)
- 1951 [Elghanian, R., J. J. Storhoff, R. C. Mucic, R. L. Letsinger, and C. A. Mirkin. 1997. "Selective](#)  
1952 [Colorimetric Detection of Polynucleotides Based on the Distance-Dependent Optical](#)  
1953 [Properties of Gold Nanoparticles." \*Science \(New York, N.Y.\)\* 277 \(5329\): 1078–81.](#)  
1954  [<https://doi.org/10.1126/science.277.5329.1078>.](#)
- 1955 [Ewers, Helge, Winfried Römer, Alicia E. Smith, Kirsten Bacia, Serge Dmitrieff, Wengang Chai,](#)  
1956 [Roberta Mancini, et al. 2010. "GM1 Structure Determines SV40-Induced Membrane](#)  
1957 [Invagination and Infection." \*Nature Cell Biology\* 12 \(1\): 11–18.](#)  
1958  [<https://doi.org/10.1038/ncb1999>.](#)
- 1959 [Falasca, L., C. Agrati, N. Petrosillo, A. Di Caro, M. R. Capobianchi, G. Ippolito, and M. Piacentini.](#)  
1960 [2015. "Molecular Mechanisms of Ebola Virus Pathogenesis: Focus on Cell Death." \*Cell\*](#)  
1961 [Death & Differentiation 22 \(8\): 1250–59. <https://doi.org/10.1038/cdd.2015.67>.](#)
- 1962 [Fan, Ying, Jing Yao, Ronghui Du, Lin Hou, Jianping Zhou, Yun Lu, Qinggang Meng, and Qiang](#)  
1963 [Zhang. 2013. "Ternary Complexes with Core-Shell Bilayer for Double Level Targeted Gene](#)  
1964 [Delivery: In Vitro and In Vivo Evaluation." \*Pharmaceutical Research\* 30 \(5\): 1215–27.](#)  
1965  [<https://doi.org/10.1007/s11095-012-0960-9>.](#)
- 1966 [Fanales-Belasio, Emanuele, Mariangela Raimondo, Barbara Suligoi, and Stefano Buttò. 2010. "HIV](#)  
1967 [Virology and Pathogenetic Mechanisms of Infection: A Brief Overview." \*Annali Dell'Istituto\*](#)  
1968 [Superiore Di Sanita 46 \(1\): 5–14. \[https://doi.org/10.4415/ANN\\\_10\\\_01\\\_02\]\(https://doi.org/10.4415/ANN\_10\_01\_02\).](#)

## Virus Structure and Mechanism Inform the Design of Nucleic Acid Delivery Systems

- 1969 [Fang, Yan, Jianxiu Xue, Shan Gao, Anqi Lu, Dongjuan Yang, Hong Jiang, Yang He, and Kai Shi.](#)  
1970 [2017. "Cleavable PEGylation: A Strategy for Overcoming the 'PEG Dilemma' in Efficient](#)  
1971 [Drug Delivery." \*Drug Delivery\* 24 \(2\): 22–32.](#)  
1972 [https://doi.org/10.1080/10717544.2017.1388451.](https://doi.org/10.1080/10717544.2017.1388451)
- 1973 [Faustino, R. S., T. J. Nelson, A. Terzic, and C. Perez-Terzic.](#) 2007. "Nuclear Transport: Target for  
1974 [Therapy." \*Clinical Pharmacology and Therapeutics\* 81 \(6\): 880–86.](#)  
1975 [https://doi.org/10.1038/sj.clpt.6100141.](https://doi.org/10.1038/sj.clpt.6100141)
- 1976 [Favaro, Marianna Teixeira de Pinho, Ugutz Unzueta, Martí de Cabo, Antonio Villaverde, Neus](#)  
1977 [Ferrer-Miralles, and Adriano Rodrigues Azzoni.](#) 2018. "Intracellular Trafficking of a Dynein-  
1978 [Based Nanoparticle Designed for Gene Delivery." \*European Journal of Pharmaceutical\*](#)  
1979 [Sciences](#) 112 (January): 71–78. [https://doi.org/10.1016/j.ejps.2017.11.002.](https://doi.org/10.1016/j.ejps.2017.11.002)
- 1980 [Favaro, M.T.P., M.A.S. de Toledo, R.F. Alves, C.A. Santos, L.L. Beloti, R. Janissen, L.G. de la](#)  
1981 [Torre, A.P. Souza, and A.R. Azzoni.](#) 2014. "Development of a Non-Viral Gene Delivery  
1982 [Vector Based on the Dynein Light Chain Rp3 and the TAT Peptide." \*Journal of\*](#)  
1983 [Biotechnology](#) 173 (March): 10–18. [https://doi.org/10.1016/j.jbiotec.2014.01.001.](https://doi.org/10.1016/j.jbiotec.2014.01.001)
- 1984 [Fay, Nikta, and Nelly Panté.](#) 2015. "Nuclear Entry of DNA Viruses." *Frontiers in Microbiology* 6  
1985 (May). [https://doi.org/10.3389/fmicb.2015.00467.](https://doi.org/10.3389/fmicb.2015.00467)
- 1986 [Fay, Nikta, and Nelly Panté.](#) 2015. "Nuclear Entry of DNA Viruses." *Frontiers in Microbiology* 6  
1987 (May). [https://doi.org/10.3389/fmicb.2015.00467.](https://doi.org/10.3389/fmicb.2015.00467)
- 1988 [Felgner, P L, T R Gadek, M Holm, R Roman, H W Chan, M Wenz, J P Northrop, G M Ringold, and](#)  
1989 [M Danielsen.](#) 1987. "Lipofection: A Highly Efficient, Lipid-Mediated DNA-Transfection  
1990 [Procedure." \*Proceedings of the National Academy of Sciences of the United States of America\*](#)  
1991 [84 \(21\): 7413–17.](#)
- 1992 [Feng, Ganjun, Hongying Chen, Junjie Li, Qiang Huang, Melanie J. Gupte, Hao Liu, Yueming Song,](#)  
1993 [and Zhishen Ge.](#) 2015. "Gene Therapy for Nucleus Pulposus Regeneration by Heme  
1994 [Oxygenase-1 Plasmid DNA Carried by Mixed Polyplex Micelles with Thermo-Responsive](#)  
1995 [Heterogeneous Coronas." \*Biomaterials\* 52 \(June\): 1–13.](#)  
1996 [https://doi.org/10.1016/j.biomaterials.2015.02.024.](https://doi.org/10.1016/j.biomaterials.2015.02.024)
- 1997 [Ferrari, Stefano, Andrea Pettenazzo, Nicoletta Garbati, Franco Zacchello, Jean-Paul Behr, and](#)  
1998 [Maurizio Scarpa.](#) 1999. "Polyethylenimine Shows Properties of Interest for Cystic Fibrosis  
1999 [Gene Therapy." \*Biochimica et Biophysica Acta \(BBA\) - Gene Structure and Expression\* 1447](#)  
2000 [\(2\): 219–25. https://doi.org/10.1016/S0167-4781\(99\)00153-0.](#)
- 2001 [Flatt, Justin W., and Sarah J. Butcher.](#) 2019. "Adenovirus Flow in Host Cell Networks." *Open*  
2002 [Biology](#) 9 (2): 190012. [https://doi.org/10.1098/rsob.190012.](https://doi.org/10.1098/rsob.190012)
- 2003 [Flint, J.; Racaniello, V.R.; Rall, G.F.; Skalka, M. Enquist, W. n.d. \*Principles of Virology, 2 Volume\*](#)  
2004 [Ser, 4th Edition / Wiley.](#) Accessed September 28, 2020. [https://www.wiley.com/en-](https://www.wiley.com/en-us/Principles+of+Virology%2C+2+Volume+Set%2C+4th+Edition-p-9781555819514)  
2005 [us/Principles+of+Virology%2C+2+Volume+Set%2C+4th+Edition-p-9781555819514.](https://www.wiley.com/en-us/Principles+of+Virology%2C+2+Volume+Set%2C+4th+Edition-p-9781555819514)
- 2006 [Fouriki, Angeliki, and Jon Dobson.](#) 2014. "Oscillating Magnet Array-Based Nanomagnetic Gene  
2007 [Transfection of Human Mesenchymal Stem Cells." \*Nanomedicine \(London, England\)\* 9 \(7\):](#)  
2008 [989–97. https://doi.org/10.2217/nnm.13.74.](#)
- 2009 [Fraley, R., S. Subramani, P. Berg, and D. Papahadjopoulos.](#) 1980. "Introduction of Liposome-  
2010 [Encapsulated SV40 DNA into Cells." \*The Journal of Biological Chemistry\* 255 \(21\): 10431–](#)  
2011 [35.](#)

## Virus Structure and Mechanism Inform the Design of Nucleic Acid Delivery Systems

- 2012 [Friedman, Adam, Sarah Claypool, and Rihe Liu. 2013. "The Smart Targeting of Nanoparticles."](#)  
2013 [Current Pharmaceutical Design 19 \(35\): 6315–29.](#)  
2014 [https://doi.org/10.2174/13816128113199990375.](https://doi.org/10.2174/13816128113199990375)
- 2015 [Fu, Yu, and Jinming Li. 2016. "A Novel Delivery Platform Based on Bacteriophage MS2 Virus-like](#)  
2016 [Particles." Virus Research 211 \(January\): 9–16.](#)  
2017 [https://doi.org/10.1016/j.virusres.2015.08.022.](https://doi.org/10.1016/j.virusres.2015.08.022)
- 2018 [Gaal, Ethlenn V. B. van, Ronald S. Oosting, Roel van Eijk, Marta Bakowska, Dries Feyen, Robbert](#)  
2019 [Jan Kok, Wim E. Hennink, Daan J. A. Crommelin, and Enrico Mastrobattista. 2011. "DNA](#)  
2020 [Nuclear Targeting Sequences for Non-Viral Gene Delivery." Pharmaceutical Research 28](#)  
2021 [\(7\): 1707–22. https://doi.org/10.1007/s11095-011-0407-8.](#)
- 2022 [Gaber, M. H., K. Hong, S. K. Huang, and D. Papahadjopoulos. 1995. "Thermosensitive Sterically](#)  
2023 [Stabilized Liposomes: Formulation and in Vitro Studies on Mechanism of Doxorubicin](#)  
2024 [Release by Bovine Serum and Human Plasma." Pharmaceutical Research 12 \(10\): 1407–16.](#)  
2025 [https://doi.org/10.1023/a:1016206631006.](https://doi.org/10.1023/a:1016206631006)
- 2026 [Galaway, Francis A., and Peter G. Stockley. 2013. "MS2 Viruslike Particles: A Robust,](#)  
2027 [Semisynthetic Targeted Drug Delivery Platform." Molecular Pharmaceutics 10 \(1\): 59–68.](#)  
2028 [https://doi.org/10.1021/mp3003368.](https://doi.org/10.1021/mp3003368)
- 2029 [Gelderblom, Hans R. 1996. "Structure and Classification of Viruses." In Medical Microbiology,](#)  
2030 [edited by Samuel Baron. 4th ed. Galveston \(TX\): University of Texas Medical Branch at](#)  
2031 [Galveston. http://www.ncbi.nlm.nih.gov/books/NBK8174/.](#)
- 2032 [Ghasemiyeh, Parisa, and Soliman Mohammadi-Samani. 2018. "Solid Lipid Nanoparticles and](#)  
2033 [Nanostructured Lipid Carriers as Novel Drug Delivery Systems: Applications, Advantages](#)  
2034 [and Disadvantages." Research in Pharmaceutical Sciences 13 \(4\): 288–303.](#)  
2035 [https://doi.org/10.4103/1735-5362.235156.](https://doi.org/10.4103/1735-5362.235156)
- 2036 [Gillard, Marianne, Zhongfan Jia, Jeff Jia Cheng Hou, Michael Song, Peter P. Gray, Trent P. Munro,](#)  
2037 [and Michael J. Monteiro. 2014. "Intracellular Trafficking Pathways for Nuclear Delivery of](#)  
2038 [Plasmid DNA Complexed with Highly Efficient Endosome Escape Polymers."](#)  
2039 [Biomacromolecules 15 \(10\): 3569–76. https://doi.org/10.1021/bm5008376.](#)
- 2040 [Gilleron, Jerome, Prasath Paramasivam, Anja Zeigerer, William Querbes, Giovanni Marsico, Cordula](#)  
2041 [Andree, Sarah Seifert, et al. 2015. "Identification of siRNA Delivery Enhancers by a](#)  
2042 [Chemical Library Screen." Nucleic Acids Research 43 \(16\): 7984–8001.](#)  
2043 [https://doi.org/10.1093/nar/gkv762.](https://doi.org/10.1093/nar/gkv762)
- 2044 [Gilleron, Jerome, William Querbes, Anja Zeigerer, Anna Borodovsky, Giovanni Marsico, Undine](#)  
2045 [Schubert, Kevin Manygoats, et al. 2013. "Image-Based Analysis of Lipid Nanoparticle-](#)  
2046 [Mediated siRNA Delivery, Intracellular Trafficking and Endosomal Escape." Nature](#)  
2047 [Biotechnology 31 \(7\): 638–46. https://doi.org/10.1038/nbt.2612.](#)
- 2048 [Greber, U F, M Suomalainen, R P Stidwill, K Boucke, M W Ebersold, and A Helenius. 1997. "The](#)  
2049 [Role of the Nuclear Pore Complex in Adenovirus DNA Entry." The EMBO Journal 16 \(19\):](#)  
2050 [5998–6007. https://doi.org/10.1093/emboj/16.19.5998.](#)
- 2051 [Greber, Urs F. 2016. "Virus and Host Mechanics Support Membrane Penetration and Cell Entry."](#)  
2052 [Journal of Virology 90 \(8\): 3802–5. https://doi.org/10.1128/JVI.02568-15.](#)

## Virus Structure and Mechanism Inform the Design of Nucleic Acid Delivery Systems

- 2053 [Greber, Urs F., Maarit Suomalainen, Robert P. Stidwill, Karin Boucke, Melanie W. Ebersold, and](#)  
2054 [Ari Helenius. 1997. "The Role of the Nuclear Pore Complex in Adenovirus DNA Entry." \*The\*](#)  
2055 [EMBO Journal](#) 16 (19): 5998–6007. <https://doi.org/10.1093/emboj/16.19.5998>.
- 2056 [Grove, Joe, and Mark Marsh. 2011. "The Cell Biology of Receptor-Mediated Virus Entry." \*Journal\*](#)  
2057 [of Cell Biology](#) 195 (7): 1071–82. <https://doi.org/10.1083/jcb.201108131>.
- 2058 [Gudipati, Saketh, Ke Zhang, and Jessica L. Rouge. 2019. "Towards Self-Transfecting Nucleic Acid](#)  
2059 [Nanostructures for Gene Regulation." \*Trends in Biotechnology\* 37 \(9\): 983–94.](#)  
2060 <https://doi.org/10.1016/j.tibtech.2019.01.008>.
- 2061 [Hamid, Faysal Bin, Jinsun Kim, and Cha-Gyun Shin. 2015. "Cellular and Viral Determinants of](#)  
2062 [Retroviral Nuclear Entry." \*Canadian Journal of Microbiology\*, October.](#)  
2063 <https://doi.org/10.1139/cjm-2015-0350>.
- 2064 [Han, X., J. H. Bushweller, D. S. Cafiso, and L. K. Tamm. 2001. "Membrane Structure and Fusion-](#)  
2065 [Triggering Conformational Change of the Fusion Domain from Influenza Hemagglutinin."](#)  
2066 [Nature Structural Biology](#) 8 (8): 715–20. <https://doi.org/10.1038/90434>.
- 2067 [Hao, Xuefang, Qian Li, Jintang Guo, Xiangkui Ren, Yakai Feng, Changcan Shi, and Wencheng](#)  
2068 [Zhang. 2017. "Multifunctional Gene Carriers with Enhanced Specific Penetration and](#)  
2069 [Nucleus Accumulation to Promote Neovascularization of HUVECs in Vivo." \*ACS Applied\*](#)  
2070 [Materials & Interfaces](#) 9 (41): 35613–27. <https://doi.org/10.1021/acsami.7b11615>.
- 2071 [Harrison, Stephen C. 2008. "Viral Membrane Fusion." \*Nature Structural & Molecular Biology\* 15](#)  
2072 [\(7\): 690–98. <https://doi.org/10.1038/nsmb.1456>.](#)
- 2073 [Hartmann, Alyssa K., Dominic F. Cairns-Gibson, Joshua J. Santiana, Mark Q. Tolentino, Halle M.](#)  
2074 [Barber, and Jessica L. Rouge. 2018. "Enzymatically Ligated DNA–Surfactants: Unmasking](#)  
2075 [Hydrophobically Modified DNA for Intracellular Gene Regulation." \*ChemBioChem\* 19 \(16\):](#)  
2076 [1734–39. <https://doi.org/10.1002/cbic.201800302>.](#)
- 2077 [Hartmann, Alyssa K., Saketh Gudipati, Andrea Pettenuzzo, Luca Ronconi, and Jessica L. Rouge.](#)  
2078 [2020. "Chimeric siRNA-DNA Surfactants for the Enhanced Delivery and Sustained](#)  
2079 [Cytotoxicity of a Gold\(III\) Metallodrug." \*Bioconjugate Chemistry\* 31 \(4\): 1063–69.](#)  
2080 <https://doi.org/10.1021/acs.bioconjchem.0c00047>.
- 2081 [Heidarli, Elmira, Simin Dadashzadeh, and Azadeh Haeri. 2017. "State of the Art of Stimuli-](#)  
2082 [Responsive Liposomes for Cancer Therapy." \*Iranian Journal of Pharmaceutical Research :\*](#)  
2083 [IJPR](#) 16 (4): 1273–1304.
- 2084 [Hoy, Sheridan M. 2018. "Patisiran: First Global Approval." \*Drugs\* 78 \(15\): 1625–31.](#)  
2085 <https://doi.org/10.1007/s40265-018-0983-6>.
- 2086 [Hu, Qinglian, Jinlei Wang, Jie Shen, Min Liu, Xue Jin, Guping Tang, and Paul K. Chu. 2012.](#)  
2087 ["Intracellular Pathways and Nuclear Localization Signal Peptide-Mediated Gene Transfection](#)  
2088 [by Cationic Polymeric Nanovectors." \*Biomaterials\* 33 \(4\): 1135–45.](#)  
2089 <https://doi.org/10.1016/j.biomaterials.2011.10.023>.
- 2090 [Huang, Keyang, Huili Ma, Juan Liu, Shuaidong Huo, Anil Kumar, Tuo Wei, Xu Zhang, et al. 2012.](#)  
2091 ["Size-Dependent Localization and Penetration of Ultrasmall Gold Nanoparticles in Cancer](#)  
2092 [Cells, Multicellular Spheroids, and Tumors in Vivo." \*ACS Nano\* 6 \(5\): 4483–93.](#)  
2093 <https://doi.org/10.1021/nn301282m>.
- 2094 [Huggins, Ian J., Carlos A. Medina, Aaron D. Springer, Arjen van den Berg, Satish Jadhav, Xianshu](#)  
2095 [Cui, and Steven F. Dowdy. 2019. "Site Selective Antibody-Oligonucleotide Conjugation via](#)



## Virus Structure and Mechanism Inform the Design of Nucleic Acid Delivery Systems

- 2096 [Microbial Transglutaminase.” \*Molecules \(Basel, Switzerland\)\* 24 \(18\).](#)  
2097 [https://doi.org/10.3390/molecules24183287.](https://doi.org/10.3390/molecules24183287)
- 2098 [Hunt, Catherine L., Nicholas J. Lennemann, and Wendy Maury. 2012. “Filovirus Entry: A Novelty in](#)  
2099 [the Viral Fusion World.” \*Viruses\* 4 \(2\): 258–75. \[https://doi.org/10.3390/v4020258.\]\(https://doi.org/10.3390/v4020258\)](#)
- 2100 [Huo, Shuaidong, Shubin Jin, Xiaowei Ma, Xiangdong Xue, Keni Yang, Anil Kumar, Paul C. Wang,](#)  
2101 [Jinchao Zhang, Zhongbo Hu, and Xing-Jie Liang. 2014. “Ultrasmall Gold Nanoparticles as](#)  
2102 [Carriers for Nucleus-Based Gene Therapy Due to Size-Dependent Nuclear Entry.” \*ACS Nano\*](#)  
2103 [8 \(6\): 5852–62. \[https://doi.org/10.1021/nn5008572.\]\(https://doi.org/10.1021/nn5008572\)](#)
- 2104 [Jackson, Aimee L., Julja Burchard, Devin Leake, Angela Reynolds, Janell Schelter, Jie Guo, Jason](#)  
2105 [M. Johnson, et al. 2006. “Position-Specific Chemical Modification of SiRNAs Reduces ‘off-](#)  
2106 [Target’ Transcript Silencing.” \*RNA\* 12 \(7\): 1197–1205. \[https://doi.org/10.1261/rna.30706.\]\(https://doi.org/10.1261/rna.30706\)](#)
- 2107 [Jae, Lucas T., and Thijs R. Brummelkamp. 2015. “Emerging Intracellular Receptors for](#)  
2108 [Hemorrhagic Fever Viruses.” \*Trends in Microbiology\* 23 \(7\): 392–400.](#)  
2109 [https://doi.org/10.1016/j.tim.2015.04.006.](https://doi.org/10.1016/j.tim.2015.04.006)
- 2110 [Jae, Lucas T., Matthijs Raaben, Andrew S. Herbert, Ana I. Kuehne, Ariel S. Wirchnianski, Timothy](#)  
2111 [K. Soh, Sarah H. Stubbs, et al. 2014. “Lassa Virus Entry Requires a Trigger-Induced](#)  
2112 [Receptor Switch.” \*Science\* 344 \(6191\): 1506–10. \[https://doi.org/10.1126/science.1252480.\]\(https://doi.org/10.1126/science.1252480\)](#)
- 2113 [James, Scott H., and Richard J. Whitley. 2017. “Influenza Viruses.” In \*Infectious Diseases\*, 1465-](#)  
2114 [1471.e1. Elsevier. \[https://doi.org/10.1016/B978-0-7020-6285-8.00172-6.\]\(https://doi.org/10.1016/B978-0-7020-6285-8.00172-6\)](#)
- 2115 [Jeffs, Lloyd B., Lorne R. Palmer, Ellen G. Ambegia, Cory Giesbrecht, Shannon Ewanick, and Ian](#)  
2116 [MacLachlan. 2005. “A Scalable, Extrusion-Free Method for Efficient Liposomal](#)  
2117 [Encapsulation of Plasmid DNA.” \*Pharmaceutical Research\* 22 \(3\): 362–72.](#)  
2118 [https://doi.org/10.1007/s11095-004-1873-z.](https://doi.org/10.1007/s11095-004-1873-z)
- 2119 [Jiang, Shan, Ahmed A. Eltoukhy, Kevin T. Love, Robert Langer, and Daniel G. Anderson. 2013.](#)  
2120 [“Lipidoid-Coated Iron Oxide Nanoparticles for Efficient DNA and SiRNA Delivery.” \*Nano\*](#)  
2121 [Letters 13 \(3\): 1059–64. \[https://doi.org/10.1021/nl304287a.\]\(https://doi.org/10.1021/nl304287a\)](#)
- 2122 [Jiang, Ying, Joseph Hardie, Yuanchang Liu, Moumita Ray, Xiang Luo, Riddha Das, Ryan F. Landis,](#)  
2123 [Michelle Farkas, and Vincent M. Rotello. 2018. “Nanocapsule-Mediated Cytosolic SiRNA](#)  
2124 [Delivery for Anti-Inflammatory Treatment.” \*Journal of Controlled Release : Official Journal\*](#)  
2125 [of the \*Controlled Release Society\* 283 \(August\): 235–40.](#)  
2126 [https://doi.org/10.1016/j.jconrel.2018.06.001.](https://doi.org/10.1016/j.jconrel.2018.06.001)
- 2127 [Jiang, Ying, Rui Tang, Bradley Duncan, Ziwen Jiang, Bo Yan, Rubul Mout, and Vincent M. Rotello.](#)  
2128 [2015. “Direct Cytosolic Delivery of SiRNA Using Nanoparticle-Stabilized Nanocapsules.”](#)  
2129 [\*Angewandte Chemie \(International Ed. in English\)\* 54 \(2\): 506–10.](#)  
2130 [https://doi.org/10.1002/anie.201409161.](https://doi.org/10.1002/anie.201409161)
- 2131 [Jin, Rongchao, Guosheng Wu, Zhi Li, Chad A. Mirkin, and George C. Schatz. 2003. “What Controls](#)  
2132 [the Melting Properties of DNA-Linked Gold Nanoparticle Assemblies?” \*Journal of the\*](#)  
2133 [American Chemical Society 125 \(6\): 1643–54. \[https://doi.org/10.1021/ja021096v.\]\(https://doi.org/10.1021/ja021096v\)](#)
- 2134 [Johannes, Ludger, and Marco Lucchino. 2018. “Current Challenges in Delivery and Cytosolic](#)  
2135 [Translocation of Therapeutic RNAs.” \*Nucleic Acid Therapeutics\* 28 \(3\): 178–93.](#)  
2136 [https://doi.org/10.1089/nat.2017.0716.](https://doi.org/10.1089/nat.2017.0716)

## Virus Structure and Mechanism Inform the Design of Nucleic Acid Delivery Systems

- 2137 [Jonge, J. de, M. Holtrop, J. Wilschut, and A. Huckriede. 2006. "Reconstituted Influenza Virus](#)  
2138 [Envelopes as an Efficient Carrier System for Cellular Delivery of Small-Interfering RNAs."](#)  
2139 [Gene Therapy 13 \(5\): 400–411. <https://doi.org/10.1038/sj.gt.3302673>.](#)
- 2140 [Joris, Freya, Lynn De Backer, Thijs Van de Vyver, Chiara Bastiancich, Stefaan C. De Smedt, and](#)  
2141 [Koen Raemdonck. 2018. "Repurposing Cationic Amphiphilic Drugs as Adjuvants to Induce](#)  
2142 [Lysosomal siRNA Escape in Nanogel Transfected Cells." \*Journal of Controlled Release\* 269](#)  
2143 [\(January\): 266–76. <https://doi.org/10.1016/j.jconrel.2017.11.019>.](#)
- 2144 [Judge, Adam D., Gurneet Bola, Amy C. H. Lee, and Ian MacLachlan. 2006. "Design of](#)  
2145 [Noninflammatory Synthetic siRNA Mediating Potent Gene Silencing in Vivo." \*Molecular\*](#)  
2146 [Therapy 13 \(3\): 494–505. <https://doi.org/10.1016/j.ymthe.2005.11.002>.](#)
- 2147 [Judge, Adam D., Vandana Sood, Janet R. Shaw, Dianne Fang, Kevin McClintock, and Ian](#)  
2148 [MacLachlan. 2005. "Sequence-Dependent Stimulation of the Mammalian Innate Immune](#)  
2149 [Response by Synthetic siRNA." \*Nature Biotechnology\* 23 \(4\): 457–62.](#)  
2150 [https://doi.org/10.1038/nbt1081.](#)
- 2151 [Juliano, R.L. 2018. "Intracellular Trafficking and Endosomal Release of Oligonucleotides: What We](#)  
2152 [Know and What We Don't." \*Nucleic Acid Therapeutics\* 28 \(3\): 166–77.](#)  
2153 [https://doi.org/10.1089/nat.2018.0727.](#)
- 2154 [Juliano, Rudolph L, Ling Wang, Francis Tavares, Edward G Brown, Lindsey James, Yamuna](#)  
2155 [Ariyarathna, Xin Ming, Chengqiong Mao, and Mark Suto. 2018. "Structure–Activity](#)  
2156 [Relationships and Cellular Mechanism of Action of Small Molecules That Enhance the](#)  
2157 [Delivery of Oligonucleotides." \*Nucleic Acids Research\* 46 \(4\): 1601–13.](#)  
2158 [https://doi.org/10.1093/nar/gkx1320.](#)
- 2159 [Juliano, Rudy, Md Rowshon Alam, Vidula Dixit, and Hyumin Kang. 2008. "Mechanisms and](#)  
2160 [Strategies for Effective Delivery of Antisense and siRNA Oligonucleotides." \*Nucleic Acids\*](#)  
2161 [Research 36 \(12\): 4158–71. <https://doi.org/10.1093/nar/gkn342>.](#)
- 2162 [Juliano, Rudy L, Xin Ming, Osamu Nakagawa, Rongzuo Xu, and Hoon Yoo. 2011. "Integrin](#)  
2163 [Targeted Delivery of Gene Therapeutics." \*Theranostics\* 1 \(March\): 211–19.](#)  
2164 [https://doi.org/10.7150/thno/v01p0211.](#)
- 2165 [Kang, Hyunmin, Rowshon Alam, Vidula Dixit, Michael Fisher, and Rudy L Juliano. 2008. "Cellular](#)  
2166 [Delivery and Biological Activity of Antisense Oligonucleotides Conjugated to a Targeted](#)  
2167 [Protein Carrier." \*Bioconjugate Chemistry\* 19 \(11\): 2182–88.](#)  
2168 [https://doi.org/10.1021/bc800270w.](#)
- 2169 [Kang, Yoon Young, Jihyeon Song, Hee Sun Jung, Gijung Kwak, Gyeonghui Yu, Joong-Hoon Ahn,](#)  
2170 [Sun Hwa Kim, and Hyejung Mok. 2018. "Implication of Multivalent Aptamers in DNA and](#)  
2171 [DNA–RNA Hybrid Structures for Efficient Drug Delivery in Vitro and in Vivo." \*Journal of\*](#)  
2172 [Industrial and Engineering Chemistry 60 \(April\): 250–58.](#)  
2173 [https://doi.org/10.1016/j.jiec.2017.11.011.](#)
- 2174 [Kang, Ziyao, Qingbin Meng, and Keliang Liu. 2019. "Peptide-Based Gene Delivery Vectors."](#)  
2175 [Journal of Materials Chemistry B 7 \(11\): 1824–41. <https://doi.org/10.1039/C8TB03124J>.](#)
- 2176 [Karimi, Mahdi, Hamed Mirshekari, Masood MoosaviBasri, Sajad Bahrami, Mohsen Moghoofei, and](#)  
2177 [Michael R. Hamblin. 2016. "Bacteriophages and Phage-Inspired Nanocarriers for Targeted](#)  
2178 [Delivery of Therapeutic Cargos." \*Advanced Drug Delivery Reviews\* 106 \(Pt A\): 45–62.](#)  
2179 [https://doi.org/10.1016/j.addr.2016.03.003.](#)

## Virus Structure and Mechanism Inform the Design of Nucleic Acid Delivery Systems

- 2180 [Karkare, Shantanu, and Deepak Bhatnagar. 2006. "Promising Nucleic Acid Analogs and Mimics: Characteristic Features and Applications of PNA, LNA, and Morpholino." \*Applied Microbiology and Biotechnology\* 71 \(5\): 575–86. <https://doi.org/10.1007/s00253-006-0434-2>](#)
- 2181
- 2182
- 2183 [Khan, Nabab, Peter W. Halcrow, Koffi L. Lakpa, Zahra Afghah, Nicole M. Miller, Steven F. Dowdy, Jonathan D. Geiger, and Xuesong Chen. 2020. "Two-Pore Channels Regulate Tat Endolysosome Escape and Tat-Mediated HIV-1 LTR Transactivation." \*FASEB Journal: Official Publication of the Federation of American Societies for Experimental Biology\* 34 \(3\): 4147–62. <https://doi.org/10.1096/fj.201902534R>](#)
- 2184
- 2185
- 2186
- 2187
- 2188 [Khorev, Oleg, Daniela Stokmaier, Oliver Schwardt, Brian Cutting, and Beat Ernst. 2008. "Trivalent, Gal/GalNAc-Containing Ligands Designed for the Asialoglycoprotein Receptor." \*Bioorganic & Medicinal Chemistry\* 16 \(9\): 5216–31. <https://doi.org/10.1016/j.bmc.2008.03.017>](#)
- 2189
- 2190
- 2191 [Kilechrist, Kameron V., Somtochukwu C. Dimobi, Meredith A. Jackson, Brian C. Evans, Thomas A. Werfel, Eric A. Dailing, Sean K. Bedingfield, Isom B. Kelly, and Craig L. Duvall. 2019. "Gal8 Visualization of Endosome Disruption Predicts Carrier Mediated Biologic Drug Intracellular Bioavailability." \*ACS Nano\* 13 \(2\): 1136–52. <https://doi.org/10.1021/acsnano.8b05482>](#)
- 2192
- 2193
- 2194
- 2195
- 2196 [Kim, H. J., and H.-J. Kim. 2017. "Yeast as an Expression System for Producing Virus-like Particles: What Factors Do We Need to Consider?" \*Letters in Applied Microbiology\* 64 \(2\): 111–23. <https://doi.org/10.1111/lam.12695>](#)
- 2197
- 2198
- 2199 [Kim, Yun Hak, Myoung-Eun Han, and Sae-Ock Oh. 2017. "The Molecular Mechanism for Nuclear Transport and Its Application." \*Anatomy & Cell Biology\* 50 \(2\): 77. <https://doi.org/10.5115/acb.2017.50.2.77>](#)
- 2200
- 2201
- 2202 [Kim, Aeyung, Tae-Hwan Shin, Seung-Min Shin, Chuong D. Pham, Dong-Ki Choi, Myung-Hee Kwon, and Yong-Sung Kim. 2012. "Cellular Internalization Mechanism and Intracellular Trafficking of Filamentous M13 Phages Displaying a Cell-Penetrating Transbody and TAT Peptide." \*PLOS ONE\* 7 \(12\): e51813. <https://doi.org/10.1371/journal.pone.0051813>](#)
- 2203
- 2204
- 2205
- 2206
- 2207 [Klibanov, Alexander L., Kazuo Maruyama, Vladimir P. Torchilin, and Leaf Huang. 1990. "Amphipathic Polyethyleneglycols Effectively Prolong the Circulation Time of Liposomes." \*FEBS Letters\* 268 \(1\): 235–37. \[https://doi.org/10.1016/0014-5793\\(90\\)81016-H\]\(https://doi.org/10.1016/0014-5793\(90\)81016-H\)](#)
- 2208
- 2209
- 2210 [Kobiler, Oren, Nir Drayman, Veronika Butin-Israeli, and Ariella Oppenheim. 2012. "Virus Strategies for Passing the Nuclear Envelope Barrier." \*Nucleus\* 3 \(6\): 526–39. <https://doi.org/10.4161/nucl.21979>](#)
- 2211
- 2212
- 2213 [Kogure, Kentaro, Hidetaka Akita, Yuma Yamada, and Hideyoshi Harashima. 2008. "Multifunctional Envelope-Type Nano Device \(MEND\) as a Non-Viral Gene Delivery System." \*Advanced Drug Delivery Reviews, Membrane Permeable Peptide Vectors: Chemistry and Functional Design for the Therapeutic Applications\*, 60 \(4\): 559–71. <https://doi.org/10.1016/j.addr.2007.10.007>](#)
- 2214
- 2215
- 2216
- 2217
- 2218 [Kondratowicz, Andrew S., Nicholas J. Lennemann, Patrick L. Sinn, Robert A. Davey, Catherine L. Hunt, Sven Moller-Tank, David K. Meyerholz, et al. 2011. "T-Cell Immunoglobulin and Mucin Domain 1 \(TIM-1\) Is a Receptor for Zaire Ebolavirus and Lake Victoria Marburgvirus." \*Proceedings of the National Academy of Sciences of the United States of America\* 108 \(20\): 8426–31. <https://doi.org/10.1073/pnas.1019030108>](#)
- 2219
- 2220
- 2221
- 2222

Formatted: Normal

## Virus Structure and Mechanism Inform the Design of Nucleic Acid Delivery Systems

- 2223 [Kono, Kenji, Toshiaki Ozawa, Tomohide Yoshida, Fuminori Ozaki, Yukihito Ishizaka, Kazuo](#)  
2224 [Maruyama, Chie Kojima, Atsushi Harada, and Sadahito Aoshima. 2010. "Highly](#)  
2225 [Temperature-Sensitive Liposomes Based on a Thermosensitive Block Copolymer for Tumor-](#)  
2226 [Specific Chemotherapy." \*Biomaterials\* 31 \(27\): 7096–7105.](#)  
2227 [https://doi.org/10.1016/j.biomaterials.2010.05.045.](https://doi.org/10.1016/j.biomaterials.2010.05.045)
- 2228 [Krop, Ian E., Muralidhar Beeram, Shanu Modi, Suzanne F. Jones, Scott N. Holden, Wei Yu, Sandhya](#)  
2229 [Girish, et al. 2010. "Phase I Study of Trastuzumab-DM1, an HER2 Antibody-Drug](#)  
2230 [Conjugate, given Every 3 Weeks to Patients with HER2-Positive Metastatic Breast Cancer."](#)  
2231 [Journal of Clinical Oncology: Official Journal of the American Society of Clinical Oncology](#)  
2232 [28 \(16\): 2698–2704. https://doi.org/10.1200/JCO.2009.26.2071.](#)
- 2233 [Kulkarni, Jayesh A., Pieter R. Cullis, and Roy van der Meel. 2018. "Lipid Nanoparticles Enabling](#)  
2234 [Gene Therapies: From Concepts to Clinical Utility." \*Nucleic Acid Therapeutics\* 28 \(3\): 146–](#)  
2235 [57. https://doi.org/10.1089/nat.2018.0721.](#)
- 2236 [Kusumoto, Kenji, Hidetaka Akita, Taichi Ishitsuka, Yu Matsumoto, Takahiro Nomoto, Ryo](#)  
2237 [Furukawa, Ayman El-Sayed, et al. 2013. "Lipid Envelope-Type Nanoparticle Incorporating a](#)  
2238 [Multifunctional Peptide for Systemic siRNA Delivery to the Pulmonary Endothelium." \*ACS\*](#)  
2239 [Nano 7 \(9\): 7534–41. https://doi.org/10.1021/nn401317t.](#)
- 2240 [Kusumoto, Kenji, Hidetaka Akita, Sarochin Santiwarangkool, and Hideyoshi Harashima. 2014.](#)  
2241 ["Advantages of Ethanol Dilution Method for Preparing GALA-Modified Liposomal siRNA](#)  
2242 [Carriers on the in Vivo Gene Knockdown Efficiency in Pulmonary Endothelium."](#)  
2243 [International Journal of Pharmaceutics 473 \(1–2\): 144–47.](#)  
2244 [https://doi.org/10.1016/j.ijpharm.2014.07.007.](https://doi.org/10.1016/j.ijpharm.2014.07.007)
- 2245 [Lam, Patricia, and Nicole F. Steinmetz. 2018. "Plant Viral and Bacteriophage Delivery of Nucleic](#)  
2246 [Acid Therapeutics." \*WIREs Nanomedicine and Nanobiotechnology\* 10 \(1\): e1487.](#)  
2247 [https://doi.org/10.1002/wnan.1487.](https://doi.org/10.1002/wnan.1487)
- 2248 [Lam, Patricia, and Nicole F. Steinmetz. ———. 2019. "Delivery of siRNA Therapeutics Using](#)  
2249 [Cowpea Chlorotic Mottle Virus-like Particles." \*Biomaterials Science\* 7 \(8\): 3138–42.](#)  
2250 [https://doi.org/10.1039/C9BM00785G.](https://doi.org/10.1039/C9BM00785G)
- 2251 [Lazo, John S., and Elizabeth R. Sharlow. 2016. "Drugging Undruggable Molecular Cancer Targets."](#)  
2252 [Annual Review of Pharmacology and Toxicology 56 \(1\): 23–40.](#)  
2253 [https://doi.org/10.1146/annurev-pharmtox-010715-103440.](https://doi.org/10.1146/annurev-pharmtox-010715-103440)
- 2254 [Lechardeur, D., K.-J. Sohn, M. Haardt, P. B. Joshi, M. Monck, R. W. Graham, B. Beatty, J. Squire,](#)  
2255 [H. O’Brodivich, and G. L. Lukacs. 1999. "Metabolic Instability of Plasmid DNA in the](#)  
2256 [Cytosol: A Potential Barrier to Gene Transfer." \*Gene Therapy\* 6 \(4\): 482–97.](#)  
2257 [https://doi.org/10.1038/sj.gt.3300867.](https://doi.org/10.1038/sj.gt.3300867)
- 2258 [LeCher, Julia C., Scott J. Nowak, and Jonathan L. McMurry. 2017. "Breaking in and Busting out:](#)  
2259 [Cell-Penetrating Peptides and the Endosomal Escape Problem." \*Biomolecular Concepts\* 8 \(3–](#)  
2260 [4\): 131–41. https://doi.org/10.1515/bmc-2017-0023.](#)
- 2261 [Lee, Y. C., R. R. Townsend, M. R. Hardy, J. Lönngrén, J. Arnarp, M. Haraldsson, and H. Lönn.](#)  
2262 [1983. "Binding of Synthetic Oligosaccharides to the Hepatic Gal/GalNAc Lectin.](#)  
2263 [Dependence on Fine Structural Features." \*The Journal of Biological Chemistry\* 258 \(1\): 199–](#)  
2264 [202.](#)

## Virus Structure and Mechanism Inform the Design of Nucleic Acid Delivery Systems

- 2265 [Lee, Yuan C., and Reiko T. Lee. 2000. "Interactions of Oligosaccharides and Glycopeptides with](#)  
2266 [Hepatic Carbohydrate Receptors." In \*Carbohydrates in Chemistry and Biology\*, 549–61. John](#)  
2267 [Wiley & Sons, Ltd. <https://doi.org/10.1002/9783527618255.ch72>.](#)
- 2268 [Legendre, J. Y., and F. C. Szoka. 1992. "Delivery of Plasmid DNA into Mammalian Cell Lines](#)  
2269 [Using PH-Sensitive Liposomes: Comparison with Cationic Liposomes." \*Pharmaceutical\*](#)  
2270 [Research](#) 9 (10): 1235–42. <https://doi.org/10.1023/a:1015836829670>.
- 2271 [Li, Guohui, Xinyu Qi, Zhaoyang Hu, and Qi Tang. 2019. "Mechanisms Mediating Nuclear](#)  
2272 [Trafficking Involved in Viral Propagation by DNA Viruses." \*Viruses\* 11 \(11\).](#)  
2273 <https://doi.org/10.3390/v11111035>.
- 2274 [Li, Hongmei, Shann S. Yu, Martina Miteva, Christopher E. Nelson, Thomas Werfel, Todd D.](#)  
2275 [Giorgio, and Craig L. Duvall. 2013. "Matrix Metalloproteinase Responsive, Proximity-](#)
- 2276 [Activated Polymeric Nanoparticles for siRNA Delivery." \*Advanced Functional Materials\* 23](#)  
2277 [\(24\): 3040–52. <https://doi.org/10.1002/adfm.201202215>.](#)
- 2278 [Li, Hui, Bohan Zhang, Xueguang Lu, Xuyu Tan, Fei Jia, Yue Xiao, Zehong Cheng, et al. 2018.](#)  
2279 ["Molecular Spherical Nucleic Acids." \*Proceedings of the National Academy of Sciences of\*](#)  
2280 [the United States of America](#) 115 (17): 4340–44. <https://doi.org/10.1073/pnas.1801836115>.
- 2281 [Li, Jing, Meng Yu, Weinan Zheng, and Wenjun Liu. 2015. "Nucleocytoplasmic Shuttling of](#)  
2282 [Influenza A Virus Proteins." \*Viruses\* 7 \(5\): 2668–82. <https://doi.org/10.3390/v7052668>.](#)
- 2283 [Li, Junwei, Maria T. Arévalo, and Mingtao Zeng. 2013. "Engineering Influenza Viral Vectors." \*Bioengineered\* 4 \(1\): 9–14. <https://doi.org/10.4161/bioe.21950>.](#)
- 2285 [Li, Sai, Zhaoyang Sun, Rhys Pryce, Marie-Laure Parsy, Sarah K. Fehling, Katrin Schlie, C. Alistair](#)  
2286 [Siebert, et al. 2016. "Acidic PH-Induced Conformations and LAMP1 Binding of the Lassa](#)  
2287 [Virus Glycoprotein Spike." \*PLoS Pathogens\* 12 \(2\).](#)  
2288 <https://doi.org/10.1371/journal.ppat.1005418>.
- 2289 [Li, Wenhui. 2015. "The Hepatitis B Virus Receptor." \*Annual Review of Cell and Developmental\*](#)  
2290 [Biology](#) 31 (1): 125–47. <https://doi.org/10.1146/annurev-cellbio-100814-125241>.
- 2291 [Li, Yantao, Kai Zhang, Porun Liu, Mo Chen, Yulin Zhong, Qingsong Ye, Ming Q. Wei, Huijun](#)  
2292 [Zhao, and Zhiyong Tang. 2019. "Encapsulation of Plasmid DNA by Nanoscale Metal-](#)
- 2293 [Organic Frameworks for Efficient Gene Transportation and Expression." \*Advanced Materials\*](#)  
2294 [31 \(29\): 1901570. <https://doi.org/10.1002/adma.201901570>.](#)
- 2295 [Liang, Kang, Raffaele Ricco, Cara M. Doherty, Mark J. Styles, Stephen Bell, Nigel Kirby, Stephen](#)  
2296 [Mudie, et al. 2015. "Biomimetic Mineralization of Metal-Organic Frameworks as Protective](#)  
2297 [Coatings for Biomacromolecules." \*Nature Communications\* 6 \(1\): 7240.](#)  
2298 <https://doi.org/10.1038/ncomms8240>.
- 2299 [Lo, Seong Loong, and Shu Wang. 2008. "An Endosomolytic Tat Peptide Produced by Incorporation](#)  
2300 [of Histidine and Cysteine Residues as a Nonviral Vector for DNA Transfection." \*Biomaterials\*](#)  
2301 [29 \(15\): 2408–14. <https://doi.org/10.1016/j.biomaterials.2008.01.031>.](#)
- 2302 [Lobovkina, Tatsiana, Gunilla B. Jacobson, Emilio Gonzalez Gonzalez, Robyn P. Hickerson, Devin](#)  
2303 [Leake, Roger L. Kaspar, Christopher H. Contag, and Richard N. Zare. 2011. "In Vivo](#)  
2304 [Sustained Release of siRNA from Solid Lipid Nanoparticles." \*ACS Nano\* 5 \(12\): 9977–83.](#)  
2305 <https://doi.org/10.1021/nn203745n>.



## Virus Structure and Mechanism Inform the Design of Nucleic Acid Delivery Systems

- 2306 [Loh, Xian Jun, Tung-Chun Lee, Qingqing Dou, and G. Roshan Deen. 2015. "Utilising Inorganic](#)  
2307 [Nanocarriers for Gene Delivery." \*Biomaterials Science\* 4 \(1\): 70–86.](#)  
2308 <https://doi.org/10.1039/C5BM00277J>.
- 2309 [Lönn, Peter, Apollo D. Kacsinta, Xian-Shu Cui, Alexander S. Hamil, Manuel Kaulich, Khirud Gogoi,](#)  
2310 [and Steven F. Dowdy. 2016. "Enhancing Endosomal Escape for Intracellular Delivery of](#)  
2311 [Macromolecular Biologic Therapeutics." \*Scientific Reports\* 6 \(1\): 32301.](#)  
2312 <https://doi.org/10.1038/srep32301>.
- 2313 [López-Huertas, María Rosa, Laura Jiménez-Tormo, Nadia Madrid-Elena, Carolina Gutiérrez, Sara](#)  
2314 [Rodríguez-Mora, Mayte Coiras, José Alcamí, and Santiago Moreno. 2017. "The CCR5-](#)  
2315 [Antagonist Maraviroc Reverses HIV-1 Latency in Vitro Alone or in Combination with the](#)  
2316 [PKC-Agonist Bryostatin-1." \*Scientific Reports\* 7 \(May\). \[https://doi.org/10.1038/s41598-017-\]\(https://doi.org/10.1038/s41598-017-02634-y\)](#)  
2317 [02634-y](#).
- 2318 [Lv, Hongtao, Shubiao Zhang, Bing Wang, Shaohui Cui, and Jie Yan. 2006. "Toxicity of Cationic](#)  
2319 [Lipids and Cationic Polymers in Gene Delivery." \*Journal of Controlled Release\* 114 \(1\):](#)  
2320 [100–109. <https://doi.org/10.1016/j.jconrel.2006.04.014>.](#)
- 2321 [Lytton-Jean, Abigail K. R., and Chad A. Mirkin. 2005. "A Thermodynamic Investigation into the](#)  
2322 [Binding Properties of DNA Functionalized Gold Nanoparticle Probes and Molecular](#)  
2323 [Fluorophore Probes." \*Journal of the American Chemical Society\* 127 \(37\): 12754–55.](#)  
2324 <https://doi.org/10.1021/ja052255o>.
- 2325 [Mach, Robert H, Yunsheng Huang, Rebekah A Freeman, Li Wu, Suwanna Vangveravong, and](#)  
2326 [Robert R Luedtke. 2004. "Conformationally-Flexible Benzamide Analogues as Dopamine D3](#)  
2327 [and  \$\Sigma\$ 2 Receptor Ligands." \*Bioorganic & Medicinal Chemistry Letters\* 14 \(1\): 195–202.](#)  
2328 <https://doi.org/10.1016/j.bmcl.2003.09.083>.
- 2329 [Maginnis, Melissa S. 2018. "Virus–Receptor Interactions: The Key to Cellular Invasion." \*Journal of\*](#)  
2330 [Molecular Biology](#) 430 (17): 2590–2611. <https://doi.org/10.1016/j.jmb.2018.06.024>.
- 2331 [Mammen, Mathai, Seok-Ki Choi, and George M. Whitesides. 1998. "Polyvalent Interactions in](#)  
2332 [Biological Systems: Implications for Design and Use of Multivalent Ligands and Inhibitors."](#)  
2333 [Angewandte Chemie International Edition](#) 37 (20): 2754–94.  
2334 [https://doi.org/10.1002/\(SICI\)1521-3773\(19981102\)37:20<2754::AID-ANIE2754>3.0.CO;2-](https://doi.org/10.1002/(SICI)1521-3773(19981102)37:20<2754::AID-ANIE2754>3.0.CO;2-3)  
2335 [3](#).
- 2336 [Marsh, Mark, and Ari Helenius. 2006. "Virus Entry: Open Sesame." \*Cell\* 124 \(4\): 729–40.](#)  
2337 <https://doi.org/10.1016/j.cell.2006.02.007>.
- 2338 [Maruyama, Kazuo, Sakae Unezaki, Noriyuki Takahashi, and Motoharu Iwatsuru. 1993. "Enhanced](#)  
2339 [Delivery of Doxorubicin to Tumor by Long-Circulating Thermosensitive Liposomes and](#)  
2340 [Local Hyperthermia." \*Biochimica et Biophysica Acta \(BBA\) - Biomembranes\* 1149 \(2\): 209–](#)  
2341 [16. \[https://doi.org/10.1016/0005-2736\\(93\\)90203-C\]\(https://doi.org/10.1016/0005-2736\(93\)90203-C\).](#)
- 2342 [Massich, Matthew D., David A. Giljohann, Dwight S. Seferos, Louise E. Ludlow, Curt M. Horvath,](#)  
2343 [and Chad A. Mirkin. 2009. "Regulating Immune Response Using Polyvalent Nucleic Acid-](#)  
2344 [Gold Nanoparticle Conjugates." \*Molecular Pharmaceutics\* 6 \(6\): 1934–40.](#)  
2345 <https://doi.org/10.1021/mp900172m>.
- 2346 [Matsumura, Yasuhiro, and Hiroshi Maeda. 1986. "A New Concept for Macromolecular Therapeutics](#)  
2347 [in Cancer Chemotherapy: Mechanism of Tumoritropic Accumulation of Proteins and the](#)  
2348 [Antitumor Agent Smancs." \*Cancer Research\* 46 \(12 Part 1\): 6387–92.](#)

## Virus Structure and Mechanism Inform the Design of Nucleic Acid Delivery Systems

- 2349 [Maxfield, F. R. 1982. “Weak Bases and Ionophores Rapidly and Reversibly Raise the PH of](#)  
2350 [Endocytic Vesicles in Cultured Mouse Fibroblasts.” \*The Journal of Cell Biology\* 95 \(2 Pt 1\):](#)  
2351 [676–81. <https://doi.org/10.1083/jcb.95.2.676>.](#)
- 2352 [Mazzon, Michela, and Mark Marsh. 2019. “Targeting Viral Entry as a Strategy for Broad-Spectrum](#)  
2353 [Antivirals.” \*F1000Research\* 8 \(September\): 1628.](#)  
2354 [https://doi.org/10.12688/f1000research.19694.1.](#)
- 2355 [McBain, S. C., U. Griesenbach, S. Xenariou, A. Keramane, C. D. Batich, E. W. F. W. Alton, and J.](#)  
2356 [Dobson. 2008. “Magnetic Nanoparticles as Gene Delivery Agents: Enhanced Transfection in](#)  
2357 [the Presence of Oscillating Magnet Arrays.” \*Nanotechnology\* 19 \(40\): 405102.](#)  
2358 [https://doi.org/10.1088/0957-4484/19/40/405102.](#)
- 2359 [Meier, Markus, Marc D. Bider, Vladimir N. Malashkevich, Martin Spiess, and Peter Burkhard. 2000](#)  
2360 [“Crystal Structure of the Carbohydrate Recognition Domain of the H1 Subunit of the](#)  
2361 [Asialoglycoprotein Receptor.” \*Journal of Molecular Biology\* 300 \(4\): 857–65.](#)  
2362 [https://doi.org/10.1006/jmbi.2000.3853.](#)
- 2363 [Mendes, Rita, Alexandra R. Fernandes, and Pedro V. Baptista. 2017. “Gold Nanoparticle Approach](#)  
2364 [to the Selective Delivery of Gene Silencing in Cancer—The Case for Combined Delivery?”](#)  
2365 [\*Genes\* 8 \(3\): 94. <https://doi.org/10.3390/genes8030094>.](#)
- 2366 [Meng, Zhao, Liang Luan, Ziyao Kang, Siliang Feng, Qingbin Meng, and Keliang Liu. 2016.](#)  
2367 [“Histidine-Enriched Multifunctional Peptide Vectors with Enhanced Cellular Uptake and](#)  
2368 [Endosomal Escape for Gene Delivery.” \*Journal of Materials Chemistry B\* 5 \(1\): 74–84.](#)  
2369 [https://doi.org/10.1039/C6TB02862D.](#)
- 2370 [Midoux, Patrick, Lucie Pigeon, Cristine Gonçalves, and Chantal Pichon. 2017. “Peptides Mediating](#)  
2371 [DNA Transport on Microtubules and Their Impact on Non-Viral Gene Transfer Efficiency.”](#)  
2372 [\*Bioscience Reports\* 37 \(5\): BSR20170995. <https://doi.org/10.1042/BSR20170995>.](#)
- 2373 [Miller, Aaron M., and David A. Dean. 2009. “Tissue-Specific and Transcription Factor-Mediated](#)  
2374 [Nuclear Entry of DNA.” \*Advanced Drug Delivery Reviews\* 61 \(7–8\): 603–13.](#)  
2375 [https://doi.org/10.1016/j.addr.2009.02.008.](#)
- 2376 [Mirkin, Chad A., Robert L. Letsinger, Robert C. Mucic, and James J. Storhoff. 1996. “A DNA-Based](#)  
2377 [Method for Rationally Assembling Nanoparticles into Macroscopic Materials.” \*Nature\* 382](#)  
2378 [\(6592\): 607–9. <https://doi.org/10.1038/382607a0>.](#)
- 2379 [Mislick, K. A., and J. D. Baldeschwieler. 1996. “Evidence for the Role of Proteoglycans in Cation-](#)  
2380 [Mediated Gene Transfer.” \*Proceedings of the National Academy of Sciences of the United\*](#)  
2381 [\*States of America\* 93 \(22\): 12349–54. <https://doi.org/10.1073/pnas.93.22.12349>.](#)
- 2382 [Miura, Naoya, Kota Tange, Yuta Nakai, Hiroki Yoshioka, Hideyoshi Harashima, and Hidetaka](#)  
2383 [Akita. 2017. “Identification and Evaluation of the Minimum Unit of a KALA Peptide](#)  
2384 [Required for Gene Delivery and Immune Activation.” \*Journal of Pharmaceutical Sciences\*](#)  
2385 [106 \(10\): 3113–19. <https://doi.org/10.1016/j.xphs.2017.05.014>.](#)
- 2386 [Miyachi, Kosuke, Yuri Kim, Olga Latinovic, Vladimir Morozov, and Gregory B. Melikyan. 2009.](#)  
2387 [“HIV Enters Cells via Endocytosis and Dynamin-Dependent Fusion with Endosomes.” \*Cell\*](#)  
2388 [137 \(3\): 433–44. <https://doi.org/10.1016/j.cell.2009.02.046>.](#)
- 2389 [Moffett, H. F., M. E. Coon, S. Radtke, S. B. Stephan, L. McKnight, A. Lambert, B. L. Stoddard, H.](#)  
2390 [P. Kiem, and M. T. Stephan. 2017. “Hit-and-Run Programming of Therapeutic Cytoreagents](#)

## Virus Structure and Mechanism Inform the Design of Nucleic Acid Delivery Systems

- 2391 [Using mRNA Nanocarriers.” \*Nature Communications\* 8 \(1\): 389.](#)  
2392 [https://doi.org/10.1038/s41467-017-00505-8.](https://doi.org/10.1038/s41467-017-00505-8)
- 2393 [Mok, Hyejung, and Tae Gwan Park. 2008. “Self-Crosslinked and Reducible Fusogenic Peptides for](#)  
2394 [Intracellular Delivery of SiRNA.” \*Biopolymers\* 89 \(10\): 881–88.](#)  
2395 [https://doi.org/10.1002/bip.21032.](https://doi.org/10.1002/bip.21032)
- 2396 [Moon, Jong-Sik, Won-Geun Kim, Chuntae Kim, Geun-Tae Park, Jeong Heo, So Y Yoo, and Jin-](#)  
2397 [Woo Oh. 2015. “M13 Bacteriophage-Based Self-Assembly Structures and Their Functional](#)  
2398 [Capabilities.” \*Mini-Reviews in Organic Chemistry\* 12 \(3\): 271–81.](#)  
2399 [https://doi.org/10.2174/1570193X1203150429105418.](https://doi.org/10.2174/1570193X1203150429105418)
- 2400 [Moret, I., J. Esteban Peris, V. M. Guillem, M. Benet, F. Revert, F. Dasí, A. Crespo, and S. F. Aliño.](#)  
2401 [2001. “Stability of PEI-DNA and DOTAP-DNA Complexes: Effect of Alkaline PH, Heparin](#)  
2402 [and Serum.” \*Journal of Controlled Release: Official Journal of the Controlled Release\*](#)  
2403 [Society 76 \(1–2\): 169–81. \[https://doi.org/10.1016/s0168-3659\\(01\\)00415-1.\]\(https://doi.org/10.1016/s0168-3659\(01\)00415-1\)](#)
- 2404 [Moriguchi, Rumiko, Kentaro Kogure, Hidetaka Akita, Shiroh Futaki, Makoto Miyagishi, Kazunari](#)  
2405 [Taira, and Hideyoshi Harashima. 2005. “A Multifunctional Envelope-Type Nano Device for](#)  
2406 [Novel Gene Delivery of SiRNA Plasmids.” \*International Journal of Pharmaceutics\* 301 \(1\):](#)  
2407 [277–85. \[https://doi.org/10.1016/j.ijpharm.2005.05.021.\]\(https://doi.org/10.1016/j.ijpharm.2005.05.021\)](#)
- 2408 [Motion, J. P. Michael, Juliane Nguyen, and Francis C. Szoka. 2012. “Phosphatase-Triggered](#)  
2409 [Fusogenic Liposomes for Cytoplasmic Delivery of Cell-Impermeable Compounds.”](#)  
2410 [\*Angewandte Chemie \(International Ed. in English\)\* 51 \(36\): 9047–51.](#)  
2411 [https://doi.org/10.1002/anie.201204198.](https://doi.org/10.1002/anie.201204198)
- 2412 [Mout, Rubul, Moumita Ray, Gulen Yesilbag Tonga, Yi-Wei Lee, Tristan Tay, Kanae Sasaki, and](#)  
2413 [Vincent M. Rotello. 2017. “Direct Cytosolic Delivery of CRISPR/Cas9-Ribonucleoprotein](#)  
2414 [for Efficient Gene Editing.” \*ACS Nano\* 11 \(3\): 2452–58.](#)  
2415 [https://doi.org/10.1021/acsnano.6b07600.](https://doi.org/10.1021/acsnano.6b07600)
- 2416 [Mukherjee, Santanu, Cory M. Pfeifer, Jennifer M. Johnson, Jay Liu, and Adam Zlotnick. 2006.](#)  
2417 [“Redirecting the Coat Protein of a Spherical Virus to Assemble into Tubular Nanostructures.”](#)  
2418 [\*Journal of the American Chemical Society\* 128 \(8\): 2538–39.](#)  
2419 [https://doi.org/10.1021/ja056656f.](https://doi.org/10.1021/ja056656f)
- 2420 [Naghavi, Mojgan H., and Derek Walsh. 2017. “Microtubule Regulation and Function during Virus](#)  
2421 [Infection.” \*Journal of Virology\* 91 \(16\). \[https://doi.org/10.1128/JVI.00538-17.\]\(https://doi.org/10.1128/JVI.00538-17\)](#)
- 2422 [Nair, Jayaprakash K., Jennifer L. S. Willoughby, Amy Chan, Klaus Charisse, Md. Rowshon Alam,](#)  
2423 [Qianfan Wang, Menno Hoekstra, et al. 2014. “Multivalent N-Acetylgalactosamine-](#)  
2424 [Conjugated SiRNA Localizes in Hepatocytes and Elicits Robust RNAi-Mediated Gene](#)  
2425 [Silencing.” \*Journal of the American Chemical Society\* 136 \(49\): 16958–61.](#)  
2426 [https://doi.org/10.1021/ja505986a.](https://doi.org/10.1021/ja505986a)
- 2427 [Nakagawa, Osamu, Xin Ming, Leaf Huang, and Rudolph L. Juliano. 2010. “Targeted Intracellular](#)  
2428 [Delivery of Antisense Oligonucleotides via Conjugation with Small-Molecule Ligands.”](#)  
2429 [\*Journal of the American Chemical Society\* 132 \(26\): 8848–49.](#)  
2430 [https://doi.org/10.1021/ja102635c.](https://doi.org/10.1021/ja102635c)
- 2431 [Nakanishi, Akira, Peggy P. Li, Qiumin Qu, Qumber H. Jafri, and Harumi Kasamatsu. 2007.](#)  
2432 [“Molecular Dissection of Nuclear Entry-Competent SV40 during Infection.” \*Virus Research\*](#)  
2433 [124 \(1–2\): 226–30. \[https://doi.org/10.1016/j.virusres.2006.10.001.\]\(https://doi.org/10.1016/j.virusres.2006.10.001\)](#)

## Virus Structure and Mechanism Inform the Design of Nucleic Acid Delivery Systems

- 2434 [Nakanishi, Akira, Dorothy Shum, Hiroshi Morioka, Eiko Otsuka, and Harumi Kasamatsu. 2002.](#)  
2435 [“Interaction of the Vp3 Nuclear Localization Signal with the Importin  \$\alpha\_2/\beta\$  Heterodimer](#)  
2436 [Directs Nuclear Entry of Infecting Simian Virus 40.” \*J. VIROL.\* 76: 10.](#)
- 2437 [Nanbo, Asuka, Masaki Imai, Shinji Watanabe, Takeshi Noda, Kei Takahashi, Gabriele Neumann,](#)  
2438 [Peter Halfmann, and Yoshihiro Kawaoka. 2010. “Ebola Virus Is Internalized into Host Cells](#)  
2439 [via Macropinocytosis in a Viral Glycoprotein-Dependent Manner.” \*PLoS Pathogens\* 6 \(9\):](#)  
2440 [e1001121. <https://doi.org/10.1371/journal.ppat.1001121>.](#)
- 2441 [Nanna, Alex R., Alexander V. Kel’in, Christopher Theile, Justin M. Pierson, Zhi Xiang Voo, Ashish](#)  
2442 [Garg, Jayaprakash K. Nair, Martin A. Maier, Kevin Fitzgerald, and Christoph Rader. 2020.](#)  
2443 [“Generation and Validation of Structurally Defined Antibody–SiRNA Conjugates.” \*Nucleic\*](#)  
2444 [Acids Research](#) 48 (10): 5281–93. <https://doi.org/10.1093/nar/gkaa286>.
- 2445 [Nayerossadat, Nouri, Talebi Maedeh, and Palizban Abas Ali. 2012. “Viral and Nonviral Delivery](#)  
2446 [Systems for Gene Delivery.” \*Advanced Biomedical Research\* 1 \(July\).](#)  
2447 [https://doi.org/10.4103/2277-9175.98152.](#)
- 2448 [Needham, D., G. Anyarambhatla, G. Kong, and M. W. Dewhirst. 2000. “A New Temperature-](#)  
2449 [Sensitive Liposome for Use with Mild Hyperthermia: Characterization and Testing in a](#)  
2450 [Human Tumor Xenograft Model.” \*Cancer Research\* 60 \(5\): 1197–1201.](#)
- 2451 [Nelemans, Levi Collin, and Leonid Gurevich. 2020. “Drug Delivery with Polymeric Nanocarriers—](#)  
2452 [Cellular Uptake Mechanisms.” \*Materials\* 13 \(2\). <https://doi.org/10.3390/ma13020366>.](#)
- 2453 [Nemerow, Glen R., and Phoebe L. Stewart. 1999. “Role of Av Integrins in Adenovirus Cell Entry](#)  
2454 [and Gene Delivery.” \*Microbiology and Molecular Biology Reviews\* 63 \(3\): 725–34.](#)
- 2455 [Neshatian, Mehrnoosh, Stephen Chung, Darren Yohan, Celina Yang, and Devika B. Chithrani. 2014.](#)  
2456 [“Determining the Size Dependence of Colloidal Gold Nanoparticle Uptake in a Tumor-like](#)  
2457 [Interface \(Hypoxic\).” \*Colloids and Interface Science Communications\* 1 \(August\): 57–61.](#)  
2458 [https://doi.org/10.1016/j.colcom.2014.07.004.](#)
- 2459 [Neumann, G., M. R. Castrucci, and Y. Kawaoka. 1997. “Nuclear Import and Export of Influenza](#)  
2460 [Virus Nucleoprotein.” \*Journal of Virology\* 71 \(12\): 9690–9700.](#)  
2461 [https://doi.org/10.1128/JVI.71.12.9690-9700.1997.](#)
- 2462 [Ngamcherdtrakul, Worapol, Jingga Morry, Shenda Gu, David J. Castro, Shaun M. Goodyear,](#)  
2463 [Thanapon Sangvanich, Moataz M. Reda, et al. 2015. “Cationic Polymer Modified](#)  
2464 [Mesoporous Silica Nanoparticles for Targeted SiRNA Delivery to HER2+ Breast Cancer.”](#)  
2465 [Advanced Functional Materials](#) 25 (18): 2646–59. <https://doi.org/10.1002/adfm.201404629>.
- 2466 [Ni, Rong, Ruilu Feng, and Ying Chau. 2019. “Synthetic Approaches for Nucleic Acid Delivery:](#)  
2467 [Choosing the Right Carriers.” \*Life \(Basel, Switzerland\)\* 9 \(3\).](#)  
2468 [https://doi.org/10.3390/life9030059.](#)
- 2469 [Ni, Rong, Junli Zhou, Naushad Hossain, and Ying Chau. 2016. “Virus-Inspired Nucleic Acid](#)  
2470 [Delivery System: Linking Virus and Viral Mimicry.” \*Advanced Drug Delivery Reviews\* 106](#)  
2471 [\(November\): 3–26. <https://doi.org/10.1016/j.addr.2016.07.005>.](#)
- 2472 [Nie, Yu, David Schaffert, Wolfgang Rödl, Manfred Ogris, Ernst Wagner, and Michael Günther.](#)  
2473 [2011. “Dual-Targeted Polyplexes: One Step towards a Synthetic Virus for Cancer Gene](#)  
2474 [Therapy.” \*Journal of Controlled Release\* 152 \(1\): 127–34.](#)  
2475 [https://doi.org/10.1016/j.jconrel.2011.02.028.](#)

## Virus Structure and Mechanism Inform the Design of Nucleic Acid Delivery Systems

- 2476 [NI, Rosi, Giljohann Da, Thaxton Cs, Lytton-Jean Ak, Han Ms, and Mirkin Ca. 2006.](#)  
2477 [“Oligonucleotide-Modified Gold Nanoparticles for Intracellular Gene Regulation.” \*Science\*](#)  
2478 [\(New York, N.Y.\). Science. May 19, 2006. <https://doi.org/10.1126/science.1125559>.](#)
- 2479 [Nunberg, Jack H., and Joanne York. 2012. “The Curious Case of Arenavirus Entry, and Its](#)  
2480 [Inhibition.” \*Viruses\* 4 \(1\): 83–101. <https://doi.org/10.3390/v4010083>.](#)
- 2481 [Oppliger, Joel, Giulia Torriani, Antonio Herrador, and Stefan Kunz. 2016. “Lassa Virus Cell Entry](#)  
2482 [via Dystroglycan Involves an Unusual Pathway of Macropinocytosis.” \*Journal of Virology\* 90](#)  
2483 [\(14\): 6412–29. <https://doi.org/10.1128/JVI.00257-16>.](#)
- 2484 [Orellana, Esteban A., Ahmed M. Abdelaal, Loganathan Rangasamy, Srinivasarao Tenneti, Sunghyun](#)  
2485 [Myoung, Philip S. Low, and Andrea L. Kasinski. 2019. “Enhancing MicroRNA Activity](#)  
2486 [through Increased Endosomal Release Mediated by Nigericin.” \*Molecular Therapy - Nucleic\*](#)  
2487 [Acids 16 \(June\): 505–18. <https://doi.org/10.1016/j.omtn.2019.04.003>.](#)
- 2488 [Orellana, Esteban A., Srinivasarao Tenneti, Loganathan Rangasamy, L. Tiffany Lyle, Philip S. Low,](#)  
2489 [and Andrea L. Kasinski. 2017. “FolamiRs: Ligand-Targeted, Vehicle-Free Delivery of](#)  
2490 [MicroRNAs for the Treatment of Cancer.” \*Science Translational Medicine\* 9 \(401\).](#)  
2491  [<https://doi.org/10.1126/scitranslmed.aam9327>.](#)
- 2492 [Ortega-Esteban, Alvaro, Gabriela N. Condezo, Ana J. Pérez-Berná, Miguel Chillón, S. Jane Flint,](#)  
2493 [David Reguera, Carmen San Martín, and Pedro J. de Pablo. 2015. “Mechanics of Viral](#)  
2494 [Chromatin Reveals the Pressurization of Human Adenovirus.” \*ACS Nano\* 9 \(11\): 10826–33.](#)  
2495  [<https://doi.org/10.1021/acs.nano.5b03417>.](#)
- 2496 [Osborn, Maire F., Julia F. Alterman, Mehran Nikan, Hong Cao, Marie C. Didiot, Matthew R.](#)  
2497 [Hassler, Andrew H. Coles, and Anastasia Khvorova. 2015. “Guanabenz \(Wytensin<sup>TM</sup>\)](#)  
2498 [Selectively Enhances Uptake and Efficacy of Hydrophobically Modified SiRNAs.” \*Nucleic\*](#)  
2499 [Acids Research 43 \(18\): 8664–72. <https://doi.org/10.1093/nar/gkv942>.](#)
- 2500 [Palanca-Wessels, Maria C., Anthony J. Convertine, Richelle Cutler-Strom, Garrett C. Booth, Fan](#)  
2501 [Lee, Geoffrey Y. Berguig, Patrick S. Stayton, and Oliver W. Press. 2011. “Anti-CD22](#)  
2502 [Antibody Targeting of PH-Responsive Micelles Enhances Small Interfering RNA Delivery](#)  
2503 [and Gene Silencing in Lymphoma Cells.” \*Molecular Therapy: The Journal of the American\*](#)  
2504 [Society of Gene Therapy 19 \(8\): 1529–37. <https://doi.org/10.1038/mt.2011.104>.](#)
- 2505 [Pan, Limin, Qianjun He, Jianan Liu, Yu Chen, Ming Ma, Linlin Zhang, and Jianlin Shi. 2012.](#)  
2506 [“Nuclear-Targeted Drug Delivery of TAT Peptide-Conjugated Monodisperse Mesoporous](#)  
2507 [Silica Nanoparticles.” \*Journal of the American Chemical Society\* 134 \(13\): 5722–25.](#)  
2508  [<https://doi.org/10.1021/ja211035w>.](#)
- 2509 [Pan, Limin, Jianan Liu, and Jianlin Shi. 2018. “Cancer Cell Nucleus-Targeting Nanocomposites for](#)  
2510 [Advanced Tumor Therapeutics.” \*Chemical Society Reviews\* 47 \(18\): 6930–46.](#)  
2511  [<https://doi.org/10.1039/C8CS00081F>.](#)
- 2512 [Pan, Yang, Tingting Jia, Yuan Zhang, Kuo Zhang, Rui Zhang, Jinming Li, and Lunan Wang. 2012.](#)  
2513 [“MS2 VLP-Based Delivery of MicroRNA-146a Inhibits Autoantibody Production in Lupus-](#)  
2514 [Prone Mice.” \*International Journal of Nanomedicine\* 7: 5957–67.](#)  
2515  [<https://doi.org/10.2147/IJN.S37990>.](#)
- 2516 [Pan, Yang, Yuan Zhang, Tingting Jia, Kuo Zhang, Jinming Li, and Lunan Wang. 2012.](#)  
2517 [“Development of a MicroRNA Delivery System Based on Bacteriophage MS2 Virus-like](#)  
2518 [Particles.” \*The FEBS Journal\* 279 \(7\): 1198–1208. <https://doi.org/10.1111/j.1742->](#)  
2519 [4658.2012.08512.x.](#)



## Virus Structure and Mechanism Inform the Design of Nucleic Acid Delivery Systems

- 2520 [Passaretti, Paolo, Yiwei Sun, Timothy R. Dafforn, and Pola Goldberg Oppenheimer. 2020. "Determination and Characterisation of the Surface Charge Properties of the Bacteriophage M13 to Assist Bio-Nanoengineering." \*RSC Advances\* 10 \(42\): 25385–92. <https://doi.org/10.1039/D0RA04086J>.](#)
- 2521
- 2522
- 2523
- 2524 [Pelkmans, Lucas, Jürgen Kartenbeck, and Ari Helenius. 2001. "Caveolar Endocytosis of Simian Virus 40 Reveals a New Two-Step Vesicular-Transport Pathway to the ER." \*Nature Cell Biology\* 3 \(5\): 473–83. <https://doi.org/10.1038/35074539>.](#)
- 2525
- 2526
- 2527 [Peng, Shuang, Binglin Bie, Yangzesheng Sun, Min Liu, Hengjiang Cong, Wentao Zhou, Yucong Xia, Heng Tang, Hexiang Deng, and Xiang Zhou. 2018. "Metal-Organic Frameworks for Precise Inclusion of Single-Stranded DNA and Transfection in Immune Cells." \*Nature Communications\* 9 \(1\): 1293. <https://doi.org/10.1038/s41467-018-03650-w>.](#)
- 2528
- 2529
- 2530
- 2531 [Penin, François, Christophe Combet, Georgios Germanidis, Pierre-Olivier Frainais, Gilbert Deléage, and Jean-Michel Pawlotsky. 2001. "Conservation of the Conformation and Positive Charges of Hepatitis C Virus E2 Envelope Glycoprotein Hypervariable Region 1 Points to a Role in Cell Attachment." \*Journal of Virology\* 75 \(12\): 5703–10. <https://doi.org/10.1128/JVI.75.12.5703-5710.2001>.](#)
- 2532
- 2533
- 2534
- 2535
- 2536 [Pinto, Lawrence H., Leslie J. Holsinger, and Robert A. Lamb. 1992. "Influenza Virus M2 Protein Has Ion Channel Activity." \*Cell\* 69 \(3\): 517–28. \[https://doi.org/10.1016/0092-8674\\(92\\)90452-I\]\(https://doi.org/10.1016/0092-8674\(92\)90452-I\).](#)
- 2537
- 2538
- 2539 [Poddar, Arpita, José J. Conesa, Kang Liang, Sudip Dhakal, Philipp Reineck, Gary Bryant, Eva Pereira, et al. 2019. "Encapsulation, Visualization and Expression of Genes with Biomimetically Mineralized Zeolitic Imidazolate Framework-8 \(ZIF-8\)." \*Small\* 15 \(36\): 1902268. <https://doi.org/10.1002/sml.201902268>.](#)
- 2540
- 2541
- 2542
- 2543 [Pouton, C, K Wagstaff, D Roth, G Moseley, and D Jans. 2007. "Targeted Delivery to the Nucleus☆." \*Advanced Drug Delivery Reviews\* 59 \(8\): 698–717. <https://doi.org/10.1016/j.addr.2007.06.010>.](#)
- 2544
- 2545
- 2546 [Prasad, B. V. Venkataram, and Michael F. Schmid. 2011. "Principles of Virus Structural Organization." \*Viral Molecular Machines\* 726 \(November\): 17–47. \[https://doi.org/10.1007/978-1-4614-0980-9\\\_3\]\(https://doi.org/10.1007/978-1-4614-0980-9\_3\).](#)
- 2547
- 2548
- 2549 [Prel, Anne, Vincent Caval, Régis Gayon, Philippe Ravassard, Christine Duthoit, Emmanuel Payen, Leila Maouche-Chretien, et al. 2015. "Highly Efficient in Vitro and in Vivo Delivery of Functional RNAs Using New Versatile MS2-Chimeric Retrovirus-like Particles." \*Molecular Therapy - Methods & Clinical Development\* 2 \(January\): 15039. <https://doi.org/10.1038/mtm.2015.39>.](#)
- 2550
- 2551
- 2552
- 2553
- 2554 [Pretto, Chiara, and Jan C. M. van Hest. 2019. "Versatile Reversible Cross-Linking Strategy to Stabilize CCMV Virus Like Particles for Efficient siRNA Delivery." \*Bioconjugate Chemistry\* 30 \(12\): 3069–77. <https://doi.org/10.1021/acs.bioconjchem.9b00731>.](#)
- 2555
- 2556
- 2557 [Ray, Moumita, Rui Tang, Ziwen Jiang, and Vincent M. Rotello. 2015. "Quantitative Tracking of Protein Trafficking to the Nucleus Using Cytosolic Protein Delivery by Nanoparticle-Stabilized Nanocapsules." \*Bioconjugate Chemistry\* 26 \(6\): 1004–7. <https://doi.org/10.1021/acs.bioconjchem.5b00141>.](#)
- 2558
- 2559
- 2560
- 2561 [Rohovie, Marcus J., Maya Nagasawa, and James R. Swartz. 2017. "Virus-like Particles: Next-Generation Nanoparticles for Targeted Therapeutic Delivery." \*Bioengineering & Translational Medicine\* 2 \(1\): 43–57. <https://doi.org/10.1002/btm2.10049>.](#)
- 2562
- 2563

## Virus Structure and Mechanism Inform the Design of Nucleic Acid Delivery Systems

- 2564 [Roldão, A., A.C. Silva, M.C.M. Mellado, P.M. Alves, and M.J.T. Carrondo. 2017. “Viruses and](#)  
2565 [Virus-Like Particles in Biotechnology: Fundamentals and Applications.” \*Comprehensive\*](#)  
2566 [Biotechnology](#), 633–56. <https://doi.org/10.1016/B978-0-12-809633-8.09046-4>.
- 2567 [Roloff, Alexander, David A. Nelles, Matthew P. Thompson, Gene W. Yeo, and Nathan C.](#)  
2568 [Gianneschi. 2018. “Self-Transfecting Micellar RNA: Modulating Nanoparticle Cell](#)  
2569 [Interactions via High Density Display of Small Molecule Ligands on Micelle Coronas.”](#)  
2570 [Bioconjugate Chemistry](#) 29 (1): 126–35. <https://doi.org/10.1021/acs.bioconjchem.7b00657>.
- 2571 [Rouge, Jessica L., Timothy L. Sita, Liangliang Hao, Fotini M. Kouri, William E. Briley, Alexander](#)  
2572 [H. Stegh, and Chad A. Mirkin. 2015. “Ribozyme-Spherical Nucleic Acids.” \*Journal of the\*](#)  
2573 [American Chemical Society](#) 137 (33): 10528–31. <https://doi.org/10.1021/jacs.5b07104>.
- 2574 [Ruan, Weimin, Meng Zheng, Yang An, Yuanyuan Liu, David B. Lovejoy, Mingcong Hao, Yan Zou,](#)  
2575 [et al. 2018. “DNA Nanoclew Templated Spherical Nucleic Acids for siRNA Delivery.”](#)  
2576 [Chemical Communications](#) 54 (29): 3609–12. <https://doi.org/10.1039/C7CC09257A>.
- 2577 [Rush, Anthony M., Matthew P. Thompson, Erick T. Tatro, and Nathan C. Gianneschi. 2013.](#)  
2578 [“Nuclease-Resistant DNA via High-Density Packing in Polymeric Micellar Nanoparticle](#)  
2579 [Coronas.” \*ACS Nano\* 7 \(2\): 1379–87. <https://doi.org/10.1021/nn305030g>.](#)
- 2580 [Russell, W. C. 2009. “Adenoviruses: Update on Structure and Function.” \*The Journal of General\*](#)  
2581 [Virology](#) 90 (Pt 1): 1–20. <https://doi.org/10.1099/vir.0.003087-0>.
- 2582 [Sahay, Gaurav, William Querbes, Christopher Alabi, Ahmed Eltoukhy, Sovan Sarkar, Christopher](#)  
2583 [Zurenko, Emmanouil Karagiannis, et al. 2013. “Efficiency of siRNA Delivery by Lipid](#)  
2584 [Nanoparticles Is Limited by Endocytic Recycling.” \*Nature Biotechnology\* 31 \(7\): 653–58.](#)  
2585 <https://doi.org/10.1038/nbt.2614>.
- 2586 [Sakurai, Yu, Hiroto Hatakeyama, Yusuke Sato, Mamoru Hyodo, Hidetaka Akita, Noritaka Ohga,](#)  
2587 [Kyoko Hida, and Hideyoshi Harashima. 2014. “RNAi-Mediated Gene Knockdown and Anti-](#)  
2588 [Angiogenic Therapy of RCCs Using a Cyclic RGD-Modified Liposomal-siRNA System.”](#)  
2589 [Journal of Controlled Release](#) 173 (January): 110–18.
- 2590 <https://doi.org/10.1016/j.jconrel.2013.10.003>.
- 2591 [Samanta, Devleena, Sasha B. Ebrahimi, Caroline D. Kusmierz, Ho Fung Cheng, and Chad A. Mirkin.](#)  
2592 [2020. “Protein Spherical Nucleic Acids for Live-Cell Chemical Analysis.” \*Journal of the\*](#)  
2593 [American Chemical Society](#) 142 (31): 13350–55. <https://doi.org/10.1021/jacs.0c06866>.
- 2594 [Santiana, Joshua J., Binglin Sui, Nicole Gomez, and Jessica L. Rouge. 2017. “Programmable](#)  
2595 [Peptide-Cross-Linked Nucleic Acid Nanocapsules as a Modular Platform for Enzyme](#)  
2596 [Specific Cargo Release.” \*Bioconjugate Chemistry\* 28 \(12\): 2910–14.](#)  
2597 <https://doi.org/10.1021/acs.bioconjchem.7b00629>.
- 2598 [Sato, Yusuke, Hiroto Hatakeyama, Yu Sakurai, Mamoru Hyodo, Hidetaka Akita, and Hideyoshi](#)  
2599 [Harashima. 2012. “A PH-Sensitive Cationic Lipid Facilitates the Delivery of Liposomal](#)  
2600 [siRNA and Gene Silencing Activity in Vitro and in Vivo.” \*Journal of Controlled Release:\*](#)  
2601 [Official Journal of the Controlled Release Society](#) 163 (3): 267–76.
- 2602 <https://doi.org/10.1016/j.jconrel.2012.09.009>.
- 2603 [Scherer, Julian, and Richard B Vallee. 2011. “Adenovirus Recruits Dynein by an Evolutionary Novel](#)  
2604 [Mechanism Involving Direct Binding to PH-Primed Hexon.” \*Viruses\* 3 \(8\): 1417–31.](#)  
2605 <https://doi.org/10.3390/v3081417>.

## Virus Structure and Mechanism Inform the Design of Nucleic Acid Delivery Systems

- 2606 [Seferos, Dwight S., Andrew E. Prigodich, David A. Giljohann, Pinal C. Patel, and Chad A. Mirkin. 2009. "Polyvalent DNA Nanoparticle Conjugates Stabilize Nucleic Acids." \*Nano Letters\* 9 \(1\): 308–11. <https://doi.org/10.1021/nl802958f>.](#)
- 2607
- 2608
- 2609 [Selby, Laura I., Christina M. Cortez-Jugo, Georgina K. Such, and Angus P. R. Johnston. 2017. "Nanoevasion: Progress toward Understanding the Endosomal Escape of Polymeric Nanoparticles." \*Wiley Interdisciplinary Reviews. Nanomedicine and Nanobiotechnology\* 9 \(5\). <https://doi.org/10.1002/wnan.1452>.](#)
- 2610
- 2611
- 2612
- 2613 [Semple, Sean C., Akin Akinc, Jianxin Chen, Ammen P. Sandhu, Barbara L. Mui, Connie K. Cho, Dinah W. Y. Sah, et al. 2010. "Rational Design of Cationic Lipids for siRNA Delivery." \*Nature Biotechnology\* 28 \(2\): 172–76. <https://doi.org/10.1038/nbt.1602>.](#)
- 2614
- 2615
- 2616 [Seth, Punit P., Michael Tanowitz, and C. Frank Bennett. 2019. "Selective Tissue Targeting of Synthetic Nucleic Acid Drugs." \*The Journal of Clinical Investigation\* 129 \(3\): 915–25. <https://doi.org/10.1172/JCI125228>.](#)
- 2617
- 2618
- 2619 [Shaheen, Sharif M., Hidetaka Akita, Takashi Nakamura, Shota Takayama, Shiroh Futaki, Atsushi Yamashita, Ryo Katoono, Nobuhiko Yui, and Hideyoshi Harashima. 2011. "KALA-Modified Multi-Layered Nanoparticles as Gene Carriers for MHC Class-I Mediated Antigen Presentation for a DNA Vaccine." \*Biomaterials\* 32 \(26\): 6342–50. <https://doi.org/10.1016/j.biomaterials.2011.05.014>.](#)
- 2620
- 2621
- 2622
- 2623
- 2624 [Shahzad, Mian M. K., Lingegowda S. Mangala, Hee Dong Han, Chunhua Lu, Justin Bottsford-Miller, Masato Nishimura, Edna M. Mora, et al. 2011. "Targeted Delivery of Small Interfering RNA Using Reconstituted High-Density Lipoprotein Nanoparticles." \*Neoplasia \(New York, N.Y.\)\* 13 \(4\): 309–19. <https://doi.org/10.1593/neo.101372>.](#)
- 2625
- 2626
- 2627
- 2628 [Shete, Harshad K., Rashmi H. Prabhu, and Vandana B. Patravale. 2014. "Endosomal Escape: A Bottleneck in Intracellular Delivery." \*Journal of Nanoscience and Nanotechnology\* 14 \(1\): 460–74. <https://doi.org/10.1166/jnn.2014.9082>.](#)
- 2629
- 2630
- 2631 [Shi, Q, A T Nguyen, Y Angell, D Deng, C-R Na, K Burgess, D D Roberts, F C Brunicardi, and N S Templeton. 2010. "A Combinatorial Approach for Targeted Delivery Using Small Molecules and Reversible Masking to Bypass Nonspecific Uptake in Vivo." \*Gene Therapy\* 17 \(9\): 1085–97. <https://doi.org/10.1038/gt.2010.55>.](#)
- 2632
- 2633
- 2634
- 2635 [Shimajima, Masayuki, Ute Ströher, Hideki Ebihara, Heinz Feldmann, and Yoshihiro Kawaoka. 2012. "Identification of Cell Surface Molecules Involved in Dystroglycan-Independent Lassa Virus Cell Entry." \*Journal of Virology\* 86 \(4\): 2067–78. <https://doi.org/10.1128/JVI.06451-11>.](#)
- 2636
- 2637
- 2638 [Sievers, E. L., R. A. Larson, E. A. Stadtmauer, E. Estey, B. Löwenberg, H. Dombret, C. Karanes, et al. 2001. "Efficacy and Safety of Gemtuzumab Ozogamicin in Patients with CD33-Positive Acute Myeloid Leukemia in First Relapse." \*Journal of Clinical Oncology: Official Journal of the American Society of Clinical Oncology\* 19 \(13\): 3244–54. <https://doi.org/10.1200/JCO.2001.19.13.3244>.](#)
- 2639
- 2640
- 2641
- 2642
- 2643 [Sikorski, Aleksander F., Monika Toporkiewicz, Justyna Meissner, Lucyna Matusiewicz, and Aleksander Czogalla. 2015. "Toward a Magic or Imaginary Bullet? Ligands for Drug Targeting to Cancer Cells: Principles, Hopes, and Challenges." \*International Journal of Nanomedicine\*, February, 1399. <https://doi.org/10.2147/IJN.S74514>.](#)
- 2644
- 2645
- 2646
- 2647 [Simeoni, F. 2003. "Insight into the Mechanism of the Peptide-Based Gene Delivery System MPG: Implications for Delivery of siRNA into Mammalian Cells." \*Nucleic Acids Research\* 31 \(11\): 2717–24. <https://doi.org/10.1093/nar/gkg385>.](#)
- 2648
- 2649

## Virus Structure and Mechanism Inform the Design of Nucleic Acid Delivery Systems

- 2650 Sokolova, Viktoriya, and Matthias Epple. 2008. "Inorganic Nanoparticles as Carriers of Nucleic  
2651 [Acids into Cells." \*Angewandte Chemie \(International Ed. in English\)\* 47 \(8\): 1382–95.](#)  
2652 <https://doi.org/10.1002/anie.200703039>.
- 2653 Springer, Aaron D., and Steven F. Dowdy. 2018. "GalNAc-SiRNA Conjugates: Leading the Way for  
2654 [Delivery of RNAi Therapeutics." \*Nucleic Acid Therapeutics\* 28 \(3\): 109–18.](#)  
2655 <https://doi.org/10.1089/nat.2018.0736>.
- 2656 Staring, Jacqueline, Matthijs Raaben, and Thijn R. Brummelkamp. 2018. "Viral Escape from  
2657 [Endosomes and Host Detection at a Glance." \*Journal of Cell Science\* 131 \(15\).](#)  
2658 <https://doi.org/10.1242/jcs.216259>.
- 2659 Stewart, Phoebe L., and Glen R. Nemerow. 2007. "Cell Integrins: Commonly Used Receptors for  
2660 [Diverse Viral Pathogens." \*Trends in Microbiology\* 15 \(11\): 500–507.](#)  
2661 <https://doi.org/10.1016/j.tim.2007.10.001>.
- 2662 St-Pierre, Gabrielle, Sudip Pal, Michael E. Østergaard, Tianyuan Zhou, Jinghua Yu, Michael  
2663 [Tanowitz, Punit P. Seth, and Stephen Hanessian. 2016. "Synthesis and Biological Evaluation](#)  
2664 [of Sialyl-Oligonucleotide Conjugates Targeting Leukocyte B Trans-Membranal Receptor](#)  
2665 [CD22 as Delivery Agents for Nucleic Acid Drugs." \*Bioorganic & Medicinal Chemistry\* 24](#)  
2666 [\(11\): 2397–2409. <https://doi.org/10.1016/j.bmc.2016.03.047>.](#)
- 2667 Subbarao, N. K., R. A. Parente, F. C. Szoka, L. Nadasdi, and K. Pongracz. 1987. "PH-Dependent  
2668 [Bilayer Destabilization by an Amphipathic Peptide." \*Biochemistry\* 26 \(11\): 2964–72.](#)  
2669 <https://doi.org/10.1021/bi00385a002>.
- 2670 Sugiyama, Mayu, Mituso Matsuura, Yoshito Takeuchi, Jun Kosaka, Mamoru Nango, and Naoto Oku.  
2671 [2004. "Possible Mechanism of Polycation Liposome \(PCL\)-Mediated Gene Transfer."](#)  
2672 [\*Biochimica Et Biophysica Acta\* 1660 \(1–2\): 24–30.](#)  
2673 <https://doi.org/10.1016/j.bbamem.2003.10.012>.
- 2674 Summerton, James E. 2006. "Morpholinos and PNAs Compared." In *Peptide Nucleic Acids,*  
2675 [Morpholinos and Related Antisense Biomolecules](#), edited by Christopher G. Janson and  
2676 [Matthew J. Daring. 89–113. Medical Intelligence Unit. Boston, MA: Springer US.](#)  
2677 [https://doi.org/10.1007/0-387-32956-0\\_6](https://doi.org/10.1007/0-387-32956-0_6).
- 2678 Sun, Hongguang, Xun Zhu, Patrick Y. Lu, Roberto R. Rosato, Wen Tan, and Youli Zu. 2014.  
2679 ["Oligonucleotide Aptamers: New Tools for Targeted Cancer Therapy." \*Molecular Therapy -\*](#)  
2680 [Nucleic Acids 3 \(January\). <https://doi.org/10.1038/mtna.2014.32>.](#)
- 2681 Sun, Peng, Zhen Li, Jingyun Wang, Hui Gao, Xi Yang, Sudong Wu, Deqiang Liu, and Qixian Chen.  
2682 [2018. "Transcellular Delivery of Messenger RNA Payloads by a Cationic Supramolecular](#)  
2683 [MOF Platform." \*Chemical Communications\* 54 \(80\): 11304–7.](#)  
2684 <https://doi.org/10.1039/C8CC07047D>.
- 2685 Sun, Yujia, Liwei Zheng, Yu Yang, Xu Qian, Ting Fu, Xiaowei Li, Zunyi Yang, He Yan, Cheng Cui,  
2686 [and Weihong Tan. 2020. "Metal–Organic Framework Nanocarriers for Drug Delivery in](#)  
2687 [Biomedical Applications." \*Nano-Micro Letters\* 12 \(1\): 103. \[https://doi.org/10.1007/s40820-\]\(https://doi.org/10.1007/s40820-020-00423-3\)](#)  
2688 [020-00423-3](#).
- 2689 Takemoto, Hiroyasu, Kanjiro Miyata, Nobuhiro Nishiyama, and Kazunori Kataoka. 2014. "Chapter  
2690 [Ten - Bioresponsive Polymer-Based Nucleic Acid Carriers." In \*Advances in Genetics\*, edited](#)  
2691 [by Leaf Huang, Dexi Liu, and Ernst Wagner, 88:289–323. Nonviral Vectors for Gene](#)  
2692 [Therapy. Academic Press. <https://doi.org/10.1016/B978-0-12-800148-6.00010-9>.](#)

## Virus Structure and Mechanism Inform the Design of Nucleic Acid Delivery Systems

- 2693 [Tang, Qiao, Ji Liu, Ying Jiang, Meining Zhang, Lanqun Mao, and Ming Wang. 2019. "Cell-Selective](#)  
2694 [Messenger RNA Delivery and CRISPR/Cas9 Genome Editing by Modulating the Interface of](#)  
2695 [Phenylboronic Acid-Derived Lipid Nanoparticles and Cellular Surface Sialic Acid." \*ACS\*](#)  
2696 [Applied Materials & Interfaces](#) 11 (50): 46585–90. <https://doi.org/10.1021/acsami.9b17749>.
- 2697 [Tang, Rui, Chang Soo Kim, David J. Solfiell, Subinoy Rana, Rubul Mout, Elih M. Velázquez-](#)  
2698 [Delgado, Apiwat Chompoosor, et al. 2013. "Direct Delivery of Functional Proteins and](#)  
2699 [Enzymes to the Cytosol Using Nanoparticle-Stabilized Nanocapsules." \*ACS Nano\* 7 \(8\):](#)  
2700 [6667–73. <https://doi.org/10.1021/nn402753y>.](#)
- 2701 [Tang, Rui, Ming Wang, Moumita Ray, Ying Jiang, Ziwen Jiang, Qiaobing Xu, and Vincent M.](#)  
2702 [Rotello. 2017. "Active Targeting of the Nucleus Using Nonpeptidic Boronate Tags." \*Journal\*](#)  
2703 [of the American Chemical Society](#) 139 (25): 8547–51. <https://doi.org/10.1021/jacs.7b02801>.
- 2704 [Tatsis, Nia, and Hildegund C. J. Ertl. 2004. "Adenoviruses as Vaccine Vectors." \*Molecular Therapy\*](#)  
2705 [10 \(4\): 616–29. <https://doi.org/10.1016/j.yithe.2004.07.013>.](#)
- 2706 [Teplensky, Michelle H., Marcus Fantham, Chetan Poudel, Colin Hockings, Meng Lu, Alina Guna,](#)  
2707 [Marta Aragonés-Anglada, et al. 2019. "A Highly Porous Metal-Organic Framework System](#)  
2708 [to Deliver Payloads for Gene Knockdown." \*Chem\* 5 \(11\): 2926–41.](#)  
2709 [https://doi.org/10.1016/j.chempr.2019.08.015.](#)
- 2710 [Thomas, M., and A. M. Klibanov. 2003. "Non-Viral Gene Therapy: Polycation-Mediated DNA](#)  
2711 [Delivery." \*Applied Microbiology and Biotechnology\* 62 \(1\): 27–34.](#)  
2712 [https://doi.org/10.1007/s00253-003-1321-8.](#)
- 2713 [Tian, Ye, Man Wu, Xiangxiang Liu, Zhi Liu, Quan Zhou, Zhongwei Niu, and Yong Huang. 2015.](#)  
2714 ["Probing the Endocytic Pathways of the Filamentous Bacteriophage in Live Cells Using](#)  
2715 [Ratiometric PH Fluorescent Indicator." \*Advanced Healthcare Materials\* 4 \(3\): 413–19.](#)  
2716 [https://doi.org/10.1002/adhm.201400508.](#)
- 2717 [Tolentino, Mark Q., Alyssa K. Hartmann, David T. Loe, and Jesssica L. Rouge. 2020. "Controlled](#)  
2718 [Release of Small Molecules and Proteins from DNA-Surfactant Stabilized Metal Organic](#)  
2719 [Frameworks." \*Journal of Materials Chemistry B\*, May. <https://doi.org/10.1039/D0TB00767F>](#)
- 2720 [Tomar, Raghuvir S., Hittu Matta, and Preet M. Chaudhary. 2003. "Use of Adeno-Associated Viral](#)  
2721 [Vector for Delivery of Small Interfering RNA." \*Oncogene\* 22 \(36\): 5712–15.](#)  
2722 [https://doi.org/10.1038/sj.onc.1206733.](#)
- 2723 [Tomita, Toshio, Mariko Watanabe, Takayuki Takahashi, Koichiro Kumai, Takushi Tadakuma, and](#)  
2724 [Tatsuji Yasuda. 1989. "Temperature-Sensitive Release of Adriamycin, an Amphiphilic](#)  
2725 [Antitumor Agent, from Dipalmitoylphosphatidylcholine-Cholesterol Liposomes." \*Biochimica\*](#)  
2726 [et Biophysica Acta \(BBA\) - Biomembranes](#) 978 (2): 185–90. [https://doi.org/10.1016/0005-](https://doi.org/10.1016/0005-2736(89)90113-2)  
2727 [2736\(89\)90113-2.](#)
- 2728 [Toscano, Miguel G., and Peter de Haan. 2018. "How Simian Virus 40 Hijacks the Intracellular](#)  
2729 [Protein Trafficking Pathway to Its Own Benefit ... and Ours." \*Frontiers in Immunology\* 9.](#)  
2730 [https://doi.org/10.3389/fimmu.2018.01160.](#)
- 2731 [Troiber, Christina, and Ernst Wagner. 2011. "Nucleic Acid Carriers Based on Precise Polymer](#)  
2732 [Conjugates." \*Bioconjugate Chemistry\* 22 \(9\): 1737–52. <https://doi.org/10.1021/bc200251r>.](#)
- 2733 [Truong, Nghia P., Wenyi Gu, Indira Prasadam, Zhongfan Jia, Ross Crawford, Yin Xiao, and Michael](#)  
2734 [J. Monteiro. 2013. "An Influenza Virus-Inspired Polymer System for the Timed Release of](#)  
2735 [SiRNA." \*Nature Communications\* 4 \(1\): 1902. <https://doi.org/10.1038/ncomms2905>.](#)



## Virus Structure and Mechanism Inform the Design of Nucleic Acid Delivery Systems

- 2736 [Tsukuda, Senko, and Koichi Watashi. 2020. "Hepatitis B Virus Biology and Life Cycle." \*Antiviral\*](#)  
2737 [Research](#) 182 (October): 104925. <https://doi.org/10.1016/j.antiviral.2020.104925>.
- 2738 [Urie, Russell, and Kaushal Rege. 2015. "Nanoscale Inorganic Scaffolds as Therapeutics and Delivery](#)  
2739 [Vehicles." \*Current Opinion in Chemical Engineering, Biological engineering / Materials\*](#)  
2740 [engineering](#), 7 (February): 120–28. <https://doi.org/10.1016/j.coche.2014.12.004>.
- 2741 [Venkatakrisnan, Balasubramanian, and Adam Zlotnick. 2016. "The Structural Biology of Hepatitis](#)  
2742 [B Virus: Form and Function." \*Annual Review of Virology\* 3 \(1\): 429–51.](#)  
2743 <https://doi.org/10.1146/annurev-virology-110615-042238>.
- 2744 [Verdine, Gregory L., and Loren D. Walensky. 2007. "The Challenge of Drugging Undruggable](#)  
2745 [Targets in Cancer: Lessons Learned from Targeting BCL-2 Family Members." \*Clinical\*](#)  
2746 [Cancer Research: An Official Journal of the American Association for Cancer Research](#) 13  
2747 (24): 7264–70. <https://doi.org/10.1158/1078-0432.CCR-07-2184>.
- 2748 [Vickers, Kasey C., Brian T. Palmisano, Bassem M. Shoucri, Robert D. Shamburek, and Alan T.](#)  
2749 [Remaley. 2011. "MicroRNAs Are Transported in Plasma and Delivered to Recipient Cells by](#)  
2750 [High-Density Lipoproteins." \*Nature Cell Biology\* 13 \(4\): 423–33.](#)  
2751 <https://doi.org/10.1038/ncb2210>.
- 2752 [Villagrana-Escareño, María V., Elizabeth Reynaga-Hernández, Othir G. Galicia-Cruz, Ana L. Durán-](#)  
2753 [Meza, Viridiana De la Cruz-González, Carmen Y. Hernández-Carballo, and Jaime Ruíz-](#)  
2754 [García. 2019. "VLPs Derived from the CCMV Plant Virus Can Directly Transfect and](#)  
2755 [Deliver Heterologous Genes for Translation into Mammalian Cells." Research Article.](#)  
2756 [BioMed Research International. Hindawi. October 29, 2019.](#)  
2757 <https://doi.org/10.1155/2019/4630891>.
- 2758 [Volpers, Christoph, and Stefan Kochanek. 2004. "Adenoviral Vectors for Gene Transfer and](#)  
2759 [Therapy." \*The Journal of Gene Medicine\* 6 \(S1\): S164–71. <https://doi.org/10.1002/jgm.496>.](#)
- 2760 [Vorburger, Stephan, and Kelly Hunt. 2002. "Adenoviral Gene Therapy." \*The Oncologist\* 7](#)  
2761 (February): 46–59. <https://doi.org/10.1634/theoncologist.7-1-46>.
- 2762 [Wagenaar, Timothy R., Tatiana Tolstykh, Chaomei Shi, Lan Jiang, JingXin Zhang, Zhifang Li,](#)  
2763 [Qunyan Yu, et al. 2015. "Identification of the Endosomal Sorting Complex Required for](#)  
2764 [Transport-I \(ESCRT-I\) as an Important Modulator of Anti-MiR Uptake by Cancer Cells."](#)  
2765 [Nucleic Acids Research](#) 43 (2): 1204–15. <https://doi.org/10.1093/nar/gku1367>.
- 2766 [Wagner, Ernst. 2012. "Polymers for siRNA Delivery: Inspired by Viruses to Be Targeted, Dynamic,](#)  
2767 [and Precise." \*Accounts of Chemical Research\* 45 \(7\): 1005–13.](#)  
2768 <https://doi.org/10.1021/ar2002232>.
- 2769 [Wang, Chen Yen, and Leaf Huang. 1989. "Highly Efficient DNA Delivery Mediated by PH-](#)  
2770 [Sensitive Immunoliposomes." \*Biochemistry\* 28 \(24\): 9508–14.](#)  
2771 <https://doi.org/10.1021/bi00450a039>.
- 2772 [Wang, Haitang, Yuen Yi C. Tam, Sam Chen, Josh Zaifman, Roy van der Meel, Marco A. Ciufolini,](#)  
2773 [and Pieter R. Cullis. 2016. "The Niemann-Pick C1 Inhibitor NP3.47 Enhances Gene](#)  
2774 [Silencing Potency of Lipid Nanoparticles Containing siRNA." \*Molecular Therapy: The\*](#)  
2775 [Journal of the American Society of Gene Therapy](#) 24 (12): 2100–2108.  
2776 <https://doi.org/10.1038/mt.2016.179>.

## Virus Structure and Mechanism Inform the Design of Nucleic Acid Delivery Systems

- 2777 [Wang, Han, Yi Shi, Jian Song, Jianxun Qi, Guangwen Lu, Jinghua Yan, and George F. Gao. 2016.](#)  
2778 [“Ebola Viral Glycoprotein Bound to Its Endosomal Receptor Niemann-Pick C1.” \*Cell\* 164](#)  
2779 [\(1\): 258–68. <https://doi.org/10.1016/j.cell.2015.12.044>.](#)
- 2780 [Wang, Ling, Yamuna Ariyaratna, Xin Ming, Bing Yang, Lindsey I. James, Silvia M. Kreda,](#)  
2781 [Melissa Porter, William Janzen, and Rudolph L. Juliano. 2017. “A Novel Family of Small](#)  
2782 [Molecules That Enhance the Intracellular Delivery and Pharmacological Effectiveness of](#)  
2783 [Antisense and Splice Switching Oligonucleotides.” \*ACS Chemical Biology\* 12 \(8\): 1999–](#)  
2784 [2007. <https://doi.org/10.1021/acscchembio.7b00242>.](#)
- 2785 [Wang, Xin, David Y. Huang, Shu-Mei Huong, and Eng-Shang Huang. 2005. “Integrin Avβ3 Is a](#)  
2786 [Coreceptor for Human Cytomegalovirus Infection.” \*Nature Medicine\* 11 \(5\): 515–21.](#)  
2787 [https://doi.org/10.1038/nm1236.](#)
- 2788 [Wang, Zhe, Wai-Keung Chui, and Paul C. Ho. 2010. “Integrin Targeted Drug and Gene Delivery.”](#)  
2789 [\*Expert Opinion on Drug Delivery\* 7 \(2\): 159–71.](#)  
2790 [https://doi.org/10.1517/17425240903468696.](#)
- 2791 [Wasungu, Luc, and Dick Hoekstra. 2006. “Cationic Lipids, Lipoplexes and Intracellular Delivery of](#)  
2792 [Genes.” \*Journal of Controlled Release: Official Journal of the Controlled Release Society\*](#)  
2793 [116 \(2\): 255–64. <https://doi.org/10.1016/j.jconrel.2006.06.024>.](#)
- 2794 [Wheeler, J. J., L. Palmer, M. Ossanlou, I. MacLachlan, R. W. Graham, Y. P. Zhang, M. J. Hope, P.](#)  
2795 [Scherrer, and P. R. Cullis. 1999. “Stabilized Plasmid-Lipid Particles: Construction and](#)  
2796 [Characterization.” \*Gene Therapy\* 6 \(2\): 271–81. <https://doi.org/10.1038/sj.gt.3300821>.](#)
- 2797 [Whitehead, Kathryn A., Robert Langer, and Daniel G. Anderson. 2009. “Knocking down Barriers:](#)  
2798 [Advances in SiRNA Delivery.” \*Nature Reviews Drug Discovery\* 8 \(2\): 129–38.](#)  
2799 [https://doi.org/10.1038/nrd2742.](#)
- 2800 [Wilén, Craig B., John C. Tilton, and Robert W. Doms. 2012. “Molecular Mechanisms of HIV Entry.”](#)  
2801 [\*Advances in Experimental Medicine and Biology\* 726: 223–42. \[4614-0980-9\\\_10.\]\(https://doi.org/10.1007/978-1-</a></a><br/>2802 <a href=\)](#)
- 2803 [Wilner, Samantha E, Brian Wengerter, Keith Maier, Maria de Lourdes Borba Magalhães, David](#)  
2804 [Soriano Del Amo, Supriya Pai, Felipe Opazo, Silvio O Rizzoli, Amy Yan, and Matthew](#)  
2805 [Levy. 2012. “An RNA Alternative to Human Transferrin: A New Tool for Targeting Human](#)  
2806 [Cells.” \*Molecular Therapy. Nucleic Acids\* 1 \(5\): e21. <https://doi.org/10.1038/mtna.2012.14>.](#)
- 2807 [Wood, Heather. 2018. “FDA Approves Patisiran to Treat Hereditary Transthyretin Amyloidosis.”](#)  
2808 [\*Nature Reviews Neurology\* 14 \(10\): 570–570. <https://doi.org/10.1038/s41582-018-0065-0>.](#)
- 2809 [Wyman, T. B., F. Nicol, O. Zelphati, P. V. Scaria, C. Plank, and F. C. Szoka. 1997. “Design,](#)  
2810 [Synthesis, and Characterization of a Cationic Peptide That Binds to Nucleic Acids and](#)  
2811 [Permeabilizes Bilayers.” \*Biochemistry\* 36 \(10\): 3008–17. <https://doi.org/10.1021/bi9618474>.](#)
- 2812 [Xiang, Bai, Xue-Li Jia, Jin-Long Qi, Li-Ping Yang, Wei-Hong Sun, Xiao Yan, Shao-Kun Yang, De-](#)  
2813 [Ying Cao, Qing Du, and Xian-Rong Qi. 2017. “Enhancing SiRNA-Based Cancer Therapy](#)  
2814 [Using a New PH-Responsive Activatable Cell-Penetrating Peptide-Modified Liposomal](#)  
2815 [System.” \*International Journal of Nanomedicine\* Volume 12 \(March\): 2385–2405.](#)  
2816 [https://doi.org/10.2147/IJN.S129574.](#)
- 2817 [Xie, Xueping, Jinfeng Liao, Xiaoru Shao, Qianshun Li, and Yunfeng Lin. 2017. “The Effect of Shape](#)  
2818 [on Cellular Uptake of Gold Nanoparticles in the Forms of Stars, Rods, and Triangles.”](#)  
2819 [\*Scientific Reports\* 7 \(1\): 3827. <https://doi.org/10.1038/s41598-017-04229-z>.](#)

## Virus Structure and Mechanism Inform the Design of Nucleic Acid Delivery Systems

- 2820 [Xu, Dong, Doug McCarty, Alda Fernandes, Michael Fisher, R. J. Samulski, and R. L. Juliano. 2005.](#)  
2821 [“Delivery of MDR1 Small Interfering RNA by Self-Complementary Recombinant Adeno-](#)  
2822 [Associated Virus Vector.” \*Molecular Therapy\* 11 \(4\): 523–30.](#)  
2823 [https://doi.org/10.1016/j.ymthe.2004.12.019.](https://doi.org/10.1016/j.ymthe.2004.12.019)
- 2824 [Xue, Hui Yi, Pengbo Guo, Wu-Cheng Wen, and Ho Lun Wong. 2015. “Lipid-Based Nanocarriers for](#)  
2825 [RNA Delivery.” \*Current Pharmaceutical Design\* 21 \(22\): 3140–47.](#)  
2826 [https://doi.org/10.2174/1381612821666150531164540.](https://doi.org/10.2174/1381612821666150531164540)
- 2827 [Yamauchi, Yohei, and Urs F. Greber. 2016. “Principles of Virus Uncoating: Cues and the Snooker](#)  
2828 [Ball.” \*Traffic \(Copenhagen, Denmark\)\* 17 \(6\): 569–92. \[https://doi.org/10.1111/tra.12387.\]\(https://doi.org/10.1111/tra.12387\)](#)
- 2829 [Yamazaki, Y., M. Nango, M. Matsuura, Y. Hasegawa, M. Hasegawa, and N. Oku. 2000. “Polycation](#)  
2830 [Liposomes, a Novel Nonviral Gene Transfer System, Constructed from Cetylated](#)  
2831 [Polyethylenimine.” \*Gene Therapy\* 7 \(13\): 1148–55. \[https://doi.org/10.1038/sj.gt.3301217.\]\(https://doi.org/10.1038/sj.gt.3301217\)](#)
- 2832 [Yan, Amy C., and Matthew Levy. 2018. “Aptamer-Mediated Delivery and Cell-Targeting Aptamers:](#)  
2833 [Room for Improvement.” \*Nucleic Acid Therapeutics\* 28 \(3\): 194–99.](#)  
2834 [https://doi.org/10.1089/nat.2018.0732.](https://doi.org/10.1089/nat.2018.0732)
- 2835 [Yang, B., X. Ming, C. Cao, B. Laing, A. Yuan, M. A. Porter, E. A. Hull-Ryde, et al. 2015. “High-](#)  
2836 [Throughput Screening Identifies Small Molecules That Enhance the Pharmacological Effects](#)  
2837 [of Oligonucleotides.” \*Nucleic Acids Research\* 43 \(4\): 1987–96.](#)  
2838 [https://doi.org/10.1093/nar/gkv060.](https://doi.org/10.1093/nar/gkv060)
- 2839 [Yang, Xiao-Chao, Bappaditya Samanta, Sarit S. Agasti, Youngdo Jeong, Zheng-Jiang Zhu, Subinoy](#)  
2840 [Rana, Oscar R. Miranda, and Vincent M. Rotello. 2011. “Drug Delivery Using Nanoparticle-](#)  
2841 [Stabilized Nanocapsules.” \*Angewandte Chemie \(International Ed. in English\)\* 50 \(2\): 477–81.](#)  
2842 [https://doi.org/10.1002/anie.201005662.](https://doi.org/10.1002/anie.201005662)
- 2843 [Yao, Jing, Ying Fan, Yuanke Li, and Leaf Huang. 2013. “Strategies on the Nuclear-Targeted](#)  
2844 [Delivery of Genes.” \*Journal of Drug Targeting\* 21 \(10\): 926–39.](#)  
2845 [https://doi.org/10.3109/1061186X.2013.830310.](https://doi.org/10.3109/1061186X.2013.830310)
- 2846 [Yao, Yanlan, Tingting Jia, Yang Pan, Hongna Gou, Yulong Li, Yu Sun, Rui Zhang, et al. 2015.](#)  
2847 [“Using a Novel MicroRNA Delivery System to Inhibit Osteoclastogenesis.” \*International\*](#)  
2848 [Journal of Molecular Sciences 16 \(4\): 8337–50. \[https://doi.org/10.3390/ijms16048337.\]\(https://doi.org/10.3390/ijms16048337\)](#)
- 2849 [Yata, Teerapong, Koon-Yang Lee, Tararaj Dharakul, Sirirung Songsivilai, Alexander Bismarck, Paul](#)  
2850 [J. Mintz, and Amin Hajitou. 2014. “Hybrid Nanomaterial Complexes for Advanced Phage-](#)  
2851 [Guided Gene Delivery.” \*Molecular Therapy - Nucleic Acids\* 3 \(January\).](#)  
2852 [https://doi.org/10.1038/mtna.2014.37.](https://doi.org/10.1038/mtna.2014.37)
- 2853 [Yatvin, M. B., W. Kreutz, B. A. Horwitz, and M. Shinitzky. 1980. “PH-Sensitive Liposomes:](#)  
2854 [Possible Clinical Implications.” \*Science\* 210 \(4475\): 1253–55.](#)  
2855 [https://doi.org/10.1126/science.7434025.](https://doi.org/10.1126/science.7434025)
- 2856 [Yatvin, M. B., J. N. Weinstein, W. H. Dennis, and R. Blumenthal. 1978. “Design of Liposomes for](#)  
2857 [Enhanced Local Release of Drugs by Hyperthermia.” \*Science\* 202 \(4374\): 1290–93.](#)  
2858 [https://doi.org/10.1126/science.364652.](https://doi.org/10.1126/science.364652)
- 2859 [Ye, She-fang, Miao-miao Tian, Tian-xiao Wang, Lei Ren, Dong Wang, Li-hua Shen, and Ting](#)  
2860 [Shang. 2012. “Synergistic Effects of Cell-Penetrating Peptide Tat and Fusogenic Peptide](#)  
2861 [HA2-Enhanced Cellular Internalization and Gene Transduction of Organosilica](#)

## Virus Structure and Mechanism Inform the Design of Nucleic Acid Delivery Systems

- 2862 [Nanoparticles.](#) *Nanomedicine: Nanotechnology, Biology and Medicine* 8 (6): 833–41.  
2863 <https://doi.org/10.1016/j.nano.2011.10.003>.
- 2864 [Yen, Albert, Yilong Cheng, Meilyn Sylvestre, Heather H. Gustafson, Sanyogitta Puri, and Suzie H. Pun.](#) 2018. “Serum Nuclease Susceptibility of mRNA Cargo in Condensed Polyplexes.”  
2865 *Molecular Pharmaceutics* 15 (6): 2268–76.  
2866 <https://doi.org/10.1021/acs.molpharmaceut.8b00134>.
- 2868 [Yin, Hao, Rosemary L. Kanasty, Ahmed A. Eltoukhy, Arturo J. Vegas, J. Robert Dorkin, and Daniel G. Anderson.](#) 2014. “Non-Viral Vectors for Gene-Based Therapy.” *Nature Reviews Genetics*  
2869 15 (8): 541–55. <https://doi.org/10.1038/nrg3763>.
- 2871 [Yonenaga, Norihito, Eriya Kenjo, Tomohiro Asai, Atsushi Tsuruta, Kosuke Shimizu, Takehisa Dewa, Mamoru Nango, and Naoto Oku.](#) 2012. “RGD-Based Active Targeting of Novel  
2872 Polycation Liposomes Bearing siRNA for Cancer Treatment.” *Journal of Controlled Release*.  
2873 Past, current and future applications of liposomes - Grand Challenges and Opportunities in  
2874 *Nanomedicine*, 160 (2): 177–81. <https://doi.org/10.1016/j.jconrel.2011.10.004>.
- 2876 [Younes, Anas, Nancy L. Bartlett, John P. Leonard, Dana A. Kennedy, Carmel M. Lynch, Eric L. Sievers, and Andres Forero-Torres.](#) 2010. “Brentuximab Vedotin (SGN-35) for Relapsed  
2877 CD30-Positive Lymphomas.” *New England Journal of Medicine* 363 (19): 1812–21.  
2878 <https://doi.org/10.1056/NEJMoa1002965>.
- 2880 [Young, Kaylie L., Alexander W. Scott, Liangliang Hao, Sarah E. Mirkin, Guoliang Liu, and Chad A. Mirkin.](#) 2012. “Hollow Spherical Nucleic Acids for Intracellular Gene Regulation Based upon  
2881 Biocompatible Silica Shells.” *Nano Letters* 12 (7): 3867–71.  
2882 <https://doi.org/10.1021/nl3020846>.
- 2884 [Yuan, Weien, and Hui Li.](#) 2017. “Polymer-Based Nanocarriers for Therapeutic Nucleic Acids  
2885 Delivery.” In , 445–60. <https://doi.org/10.1016/B978-0-323-46143-6.00014-2>.
- 2886 [Zanta, M. A., P. Belguise-Valladier, and J.-P. Behr.](#) 1999. “Gene Delivery: A Single Nuclear  
2887 Localization Signal Peptide Is Sufficient to Carry DNA to the Cell Nucleus.” *Proceedings of*  
2888 *the National Academy of Sciences* 96 (1): 91–96. <https://doi.org/10.1073/pnas.96.1.91>.
- 2889 [Zatsepin, Timofei S, Yuri V Kotelevtsev, and Victor Koteliensky.](#) 2016. “Lipid Nanoparticles for  
2890 Targeted siRNA Delivery – Going from Bench to Bedside.” *International Journal of*  
2891 *Nanomedicine* 11 (July): 3077–86. <https://doi.org/10.2147/IJN.S106625>.
- 2892 [Zhang, Jinming, Ruie Chen, Xiefan Fang, Fengqian Chen, Yitao Wang, and Meiwan Chen.](#) 2015.  
2893 “Nucleolin Targeting AS1411 Aptamer Modified PH-Sensitive Micelles for Enhanced  
2894 Delivery and Antitumor Efficacy of Paclitaxel.” *Nano Research* 8 (1): 201–18.  
2895 <https://doi.org/10.1007/s12274-014-0619-4>.
- 2896 [Zhao, Nianxi, Hitesh G Bagaria, Michael S Wong, and Youli Zu.](#) 2011. “A Nanocomplex That Is  
2897 Both Tumor Cell-Selective and Cancer Gene-Specific for Anaplastic Large Cell Lymphoma.”  
2898 *Journal of Nanobiotechnology* 9 (January): 2. <https://doi.org/10.1186/1477-3155-9-2>.
- 2899 [Zhi, Defu, Shubiao Zhang, Shaohui Cui, Yinan Zhao, Yinhuan Wang, and Defeng Zhao.](#) 2013. “The  
2900 Headgroup Evolution of Cationic Lipids for Gene Delivery.” *Bioconjugate Chemistry* 24 (4):  
2901 487–519. <https://doi.org/10.1021/bc300381s>.
- 2902 [Zhu, Lin, and Ram I Mahato.](#) 2010. “Lipid and Polymeric Carrier-Mediated Nucleic Acid Delivery.”  
2903 *Expert Opinion on Drug Delivery* 7 (10): 1209–26.  
2904 <https://doi.org/10.1517/17425247.2010.513969>.

## Virus Structure and Mechanism Inform the Design of Nucleic Acid Delivery Systems

2905 [Zhuang, Jia, Chun-Hong Kuo, Lien-Yang Chou, De-Yu Liu, Eranthie Weerapana, and Chia-Kuang](#)  
2906 [Tsung. 2014. "Optimized Metal–Organic–Framework Nanospheres for Drug Delivery:](#)  
2907 [Evaluation of Small-Molecule Encapsulation." \*ACS Nano\* 8 \(3\): 2812–19.](#)  
2908 [https://doi.org/10.1021/nn406590q.](https://doi.org/10.1021/nn406590q)

2909

2910

Formatted: Not Highlight

Formatted: Indent: Left: 0", Hanging: 0.39"



## Virus Structure and Mechanism Inform the Design of Nucleic Acid Delivery Systems

- 2911 Adams, David, Alejandra Gonzalez-Duarte, William D. O’Riordan, Chih-Chao Yang, Mitsuharu  
2912 Ueda, Arnt V. Kristen, Ivailo Tournev, et al. 2018. “Patisiran, an RNAi Therapeutic, for  
2913 Hereditary Transthyretin Amyloidosis.” *The New England Journal of Medicine* 379 (1): 11–  
2914 21. <https://doi.org/10.1056/NEJMoa1716153>.
- 2915 Akinc, Akin, William Querbes, Soma De, June Qin, Maria Frank-Kamenetsky, K. Narayanannair  
2916 Jayaprakash, Muthusamy Jayaraman, et al. 2010. “Targeted Delivery of RNAi Therapeutics  
2917 With Endogenous and Exogenous Ligand-Based Mechanisms.” *Molecular Therapy* 18 (7):  
2918 1357–64. <https://doi.org/10.1038/mt.2010.85>.
- 2919 Alam, Md Rowshon, Vidula Dixit, Hyunmin Kang, Zi-Bo Li, Xiaoyuan Chen, JoAnn Trejo, Michael  
2920 Fisher, and Rudy L. Juliano. 2008. “Intracellular Delivery of an Anionic Antisense  
2921 Oligonucleotide via Receptor-Mediated Endocytosis.” *Nucleic Acids Research* 36 (8): 2764–  
2922 76. <https://doi.org/10.1093/nar/gkn115>.
- 2923 Alba, Raul, Angela C. Bradshaw, Lynda Coughlan, Laura Denby, Robert A. McDonald, Simon N.  
2924 Waddington, Suzanne M. K. Buckley, et al. 2010. “Biodistribution and Retargeting of FX-  
2925 Binding Ablated Adenovirus Serotype 5 Vectors.” *Blood* 116 (15): 2656–64.  
2926 <https://doi.org/10.1182/blood-2009-12-260026>.
- 2927 Alipour, Mohsen, Saman Hosseinkhani, Reza Sheikhejad, and Roya Cheraghi. 2017. “Nano-  
2928 Biomimetic Carriers Are Implicated in Mechanistic Evaluation of Intracellular Gene  
2929 Delivery.” *Scientific Reports* 7 (1): 41507. <https://doi.org/10.1038/srep41507>.
- 2930 Ämmälä, C., W. J. Drury, L. Knerr, I. Ahlstedt, P. Stillemark-Billton, C. Wennberg-Huldt, E.-M.  
2931 Andersson, et al. 2018. “Targeted Delivery of Antisense Oligonucleotides to Pancreatic  $\beta$ -  
2932 Cells.” *Science Advances* 4 (10): eaat3386. <https://doi.org/10.1126/sciadv.aat3386>.
- 2933 Arana, Lide, Laura Bayón-Cordero, Laura Isabel Sarasola, Miren Berasategi, Sandra Ruiz, and Itziar  
2934 Alkorta. 2019. “Solid Lipid Nanoparticles Surface Modification Modulates Cell  
2935 Internalization and Improves Chemotoxic Treatment in an Oral Carcinoma Cell Line.”  
2936 *Nanomaterials* 9 (3). <https://doi.org/10.3390/nano9030464>.
- 2937 Arinaminpathy, Nimalan, and Bryan Grenfell. 2010. “Dynamics of Glycoprotein Charge in the  
2938 Evolutionary History of Human Influenza.” *PLoS ONE* 5 (12).  
2939 <https://doi.org/10.1371/journal.pone.0015674>.
- 2940 Ashley, Carlee E., Eric C. Carnes, Genevieve K. Phillips, Paul N. Durfee, Mekensey D. Buley,  
2941 Christopher A. Lino, David P. Padilla, et al. 2011. “Cell-Specific Delivery of Diverse Cargos  
2942 by Bacteriophage MS2 Virus-like Particles.” *ACS Nano* 5 (7): 5729–45.  
2943 <https://doi.org/10.1021/nn201397z>.
- 2944 Awino, Joseph K., Saketh Gudipati, Alyssa K. Hartmann, Joshua J. Santiana, Dominic F. Cairns-  
2945 Gibson, Nicole Gomez, and Jessica L. Rouge. 2017. “Nucleic Acid Nanocapsules for  
2946 Enzyme-Triggered Drug Release.” *Journal of the American Chemical Society* 139 (18):  
2947 6278–81. <https://doi.org/10.1021/jacs.6b13087>.
- 2948 Banerjee, Rajkumar, Pradeep Tyagi, Song Li, and Leaf Huang. 2004. “Anisamide-Targeted Stealth  
2949 Liposomes: A Potent Carrier for Targeting Doxorubicin to Human Prostate Cancer Cells.”  
2950 *International Journal of Cancer* 112 (4): 693–700. <https://doi.org/10.1002/ijc.20452>.
- 2951 Banga, Resham J., Brian Meckes, Suguna P. Narayan, Anthony J. Sprangers, SonBinh T. Nguyen,  
2952 and Chad A. Mirkin. 2017. “Cross-Linked Micellar Spherical Nucleic Acids from  
2953 Thermoresponsive Templates.” *Journal of the American Chemical Society* 139 (12): 4278–81.  
2954 <https://doi.org/10.1021/jacs.6b13359>.

Formatted: Highlight

## Virus Structure and Mechanism Inform the Design of Nucleic Acid Delivery Systems

- 2955 Barba, Anna Angela, Sabrina Bochicchio, Annalisa Dalmoro, and Gaetano Lamberti. 2019. "Lipid  
2956 Delivery Systems for Nucleic-Acid-Based-Drugs: From Production to Clinical Applications."  
2957 *Pharmaceutics* 11 (8). <https://doi.org/10.3390/pharmaceutics11080360>.
- 2958 Barrow, Eric, Anthony V Nicola, and Jin Liu. 2013. "Multiscale Perspectives of Virus Entry via  
2959 Endocytosis." *Virology Journal* 10 (June): 177. <https://doi.org/10.1186/1743-422X-10-177>.
- 2960 Boulant, Steeve, Megan Stanifer, and Pierre-Yves Lozach. 2015. "Dynamics of Virus-Receptor  
2961 Interactions in Virus Binding, Signaling, and Endocytosis." *Viruses* 7 (6): 2794–2815.  
2962 <https://doi.org/10.3390/v7062747>.
- 2963 Breuzard, Gilles, Magdalena Tertil, Cristine Gonçalves, Hervé Cheradame, Philippe Géguan, Chantal  
2964 Pichon, and Patrick Midoux. 2008. "Nuclear Delivery of NFκB-Assisted DNA/Polymer  
2965 Complexes: Plasmid DNA Quantitation by Confocal Laser Scanning Microscopy and  
2966 Evidence of Nuclear Polyplexes by FRET Imaging." *Nucleic Acids Research* 36 (12): e71.  
2967 <https://doi.org/10.1093/nar/gkn287>.
- 2968 Burckhardt, Christoph J., Maarit Suomalainen, Philipp Schoenenberger, Karin Boucke, Silvio  
2969 Hemmi, and Urs F. Greber. 2011. "Drifting Motions of the Adenovirus Receptor CAR and  
2970 Immobile Integrins Initiate Virus Uncoating and Membrane Lytic Protein Exposure." *Cell  
2971 Host & Microbe* 10 (2): 105–17. <https://doi.org/10.1016/j.chom.2011.07.006>.
- 2972 Burger, Nina, Abin Biswas, Daniel Barzan, Anne Kirchner, Hiltraud Hosser, Michael Hausmann,  
2973 Georg Hildenbrand, Carsten Herskind, Frederik Wenz, and Marlon R. Veldwijk. 2014. "A  
2974 Method for the Efficient Cellular Uptake and Retention of Small Modified Gold  
2975 Nanoparticles for the Radiosensitization of Cells." *Nanomedicine: Nanotechnology, Biology  
2976 and Medicine* 10 (6): 1365–73. <https://doi.org/10.1016/j.nano.2014.03.011>.
- 2977 Burgess, Kevin. 2001. "Solid-Phase Syntheses of β-Turn Analogues To Mimic or Disrupt  
2978 Protein–Protein Interactions." *Accounts of Chemical Research* 34 (10): 826–35.  
2979 <https://doi.org/10.1021/ar9901523>.
- 2980 Cai, Xiaoqing, Hsiang-Hsin Chen, Cheng-Liang Wang, Shin-Tai Chen, Sheng-Feng Lai, Chia-Chi  
2981 Chien, Yi-Yun Chen, et al. 2011. "Imaging the Cellular Uptake of Tiopronin-Modified Gold  
2982 Nanoparticles." *Analytical and Bioanalytical Chemistry* 401 (3): 809–16.  
2983 <https://doi.org/10.1007/s00216-011-4986-3>.
- 2984 Callaway, Ewen. 2020. "The Race for Coronavirus Vaccines: A Graphical Guide." *Nature* 580  
2985 (7805): 576–77. <https://doi.org/10.1038/d41586-020-01221-y>.
- 2986 Carette, Jan E., Matthijs Raaben, Anthony C. Wong, Andrew S. Herbert, Gregor Obernosterer,  
2987 Nirupama Mulherkar, Ana I. Kuehne, et al. 2011. "Ebola Virus Entry Requires the  
2988 Cholesterol Transporter Niemann-Pick C1." *Nature* 477 (7364): 340–43.  
2989 <https://doi.org/10.1038/nature10348>.
- 2990 Chang, Kai-Ling, Yuriko Higuchi, Shigeru Kawakami, Fumiyoshi Yamashita, and Mitsuru Hashida.  
2991 2010. "Efficient Gene Transfection by Histidine-Modified Chitosan through Enhancement of  
2992 Endosomal Escape." *Bioconjugate Chemistry* 21 (6): 1087–95.  
2993 <https://doi.org/10.1021/bc1000609>.
- 2994 Chery, Jessica. 2016. "RNA Therapeutics: RNAi and Antisense Mechanisms and Clinical  
2995 Applications." *Postdoc Journal : A Journal of Postdoctoral Research and Postdoctoral  
2996 Affairs* 4 (7): 35–50. <https://10.14304/surya.jpr.v4n7.5>.

## Virus Structure and Mechanism Inform the Design of Nucleic Acid Delivery Systems

- 2997 Choi, Chung Hang J., Liangliang Hao, Suguna P. Narayan, Evelyn Auyeung, and Chad A. Mirkin.  
2998 2013. "Mechanism for the Endocytosis of Spherical Nucleic Acid Nanoparticle Conjugates."  
2999 *Proceedings of the National Academy of Sciences* 110 (19): 7625–30.  
3000 <https://doi.org/10.1073/pnas.1305804110>.
- 3001 Cohen, Ohad, and Rony Granek. 2014. "Nucleus-Targeted Drug Delivery: Theoretical Optimization  
3002 of Nanoparticles Decoration for Enhanced Intracellular Active Transport." *Nano Letters* 14  
3003 (5): 2515–21. <https://doi.org/10.1021/nl500248q>.
- 3004 Corbett, Kizzmekia S., Darin Edwards, Sarah R. Leist, Olubukola M. Abiona, Seyhan Boyoglu-  
3005 Barnum, Rebecca A. Gillespie, Sunny Himansu, et al. 2020. "SARS-CoV-2 mRNA Vaccine  
3006 Development Enabled by Prototype Pathogen Preparedness." *BioRxiv*, June.  
3007 <https://doi.org/10.1101/2020.06.11.145920>.
- 3008 Corey, David R. 2007. "Chemical Modification: The Key to Clinical Application of RNA  
3009 Interference?" *Journal of Clinical Investigation* 117 (12): 3615–22.  
3010 <https://doi.org/10.1172/JCI33483>.
- 3011 Cruz-Acuña, Melissa, Justin R. Halman, Kirill A. Afonin, Jon Dobson, and Carlos Rinaldi. 2018.  
3012 "Magnetic Nanoparticles Loaded with Functional RNA Nanoparticles." *Nanoscale* 10 (37):  
3013 17761–70. <https://doi.org/10.1039/C8NR04254C>.
- 3014 Cui, Shao-Hui, De-Fu Zhi, Yi-Nan Zhao, Hui-Ying Chen, Yao Meng, Chuan-Min Zhang, and Shu-  
3015 Biao Zhang. 2016. "Cationic Liposomes with Folic Acid as Targeting Ligand for Gene  
3016 Delivery." *Bioorganic & Medicinal Chemistry Letters* 26 (16): 4025–29.  
3017 <https://doi.org/10.1016/j.bmcl.2016.06.085>.
- 3018 Cutler, Joshua I., Evelyn Auyeung, and Chad A. Mirkin. 2012. "Spherical Nucleic Acids." *Journal of*  
3019 *the American Chemical Society* 134 (3): 1376–91. <https://doi.org/10.1021/ja209351u>.
- 3020 Cutler, Joshua I., Ke Zhang, Dan Zheng, Evelyn Auyeung, Andrew E. Prigodich, and Chad A.  
3021 Mirkin. 2011. "Polyvalent Nucleic Acid Nanostructures." *Journal of the American Chemical*  
3022 *Society* 133 (24): 9254–57. <https://doi.org/10.1021/ja203375n>.
- 3023 Cutler, Joshua I., Dan Zheng, Xiaoyang Xu, David A. Giljohann, and Chad A. Mirkin. 2010.  
3024 "Polyvalent Oligonucleotide Iron Oxide Nanoparticle 'Click' Conjugates." *Nano Letters* 10  
3025 (4): 1477–80. <https://doi.org/10.1021/nl100477m>.
- 3026 Dalmau-Mena, Inmaculada, Pablo del Pino, Beatriz Pelaz, Miguel Ángel Cuesta-Geijo, Inmaculada  
3027 Galindo, María Moros, Jesús M. de la Fuente, and Covadonga Alonso. 2018. "Nanoparticles  
3028 Engineered to Bind Cellular Motors for Efficient Delivery." *Journal of Nanobiotechnology* 16  
3029 (1): 33. <https://doi.org/10.1186/s12951-018-0354-1>.
- 3030 Danhier, Fabienne, Aude Le Breton, and Véronique Préat. 2012. "RGD-Based Strategies To Target  
3031 Alpha(v) Beta(3) Integrin in Cancer Therapy and Diagnosis." Review-article. American  
3032 Chemical Society. World. October 4, 2012. <https://doi.org/10.1021/mp3002733>.
- 3033 Dassie, Justin P., and Paloma H. Giangrande. 2013. "Current Progress on Aptamer-Targeted  
3034 Oligonucleotide Therapeutics." *Therapeutic Delivery* 4 (12): 1527–46.  
3035 <https://doi.org/10.4155/tde.13.118>.
- 3036 Ding, Fei, Xihui Gao, Xiangang Huang, Huan Ge, Miao Xie, Jiwen Qian, Jie Song, Yuehua Li,  
3037 Xinyuan Zhu, and Chuan Zhang. 2020. "Polydopamine-Coated Nucleic Acid Nanogel for  
3038 SiRNA-Mediated Low-Temperature Photothermal Therapy." *Biomaterials* 245 (July):  
3039 119976. <https://doi.org/10.1016/j.biomaterials.2020.119976>.

## Virus Structure and Mechanism Inform the Design of Nucleic Acid Delivery Systems

- 3040 Ding, Fei, Xiangang Huang, Xihui Gao, Miao Xie, Gaifang Pan, Qifeng Li, Jie Song, Xinyuan Zhu,  
3041 and Chuan Zhang. 2019. "A Non-Cationic Nucleic Acid Nanogel for the Delivery of the  
3042 CRISPR/Cas9 Gene Editing Tool." *Nanoscale* 11 (37): 17211–15.  
3043 <https://doi.org/10.1039/C9NR05233J>.
- 3044 Ding, Fei, Quanbing Mou, Yuan Ma, Gaifang Pan, Yuanyuan Guo, Gangsheng Tong, Chung Hang  
3045 Jonathan Choi, Xinyuan Zhu, and Chuan Zhang. 2018. "A Crosslinked Nucleic Acid Nanogel  
3046 for Effective siRNA Delivery and Antitumor Therapy." *Angewandte Chemie International  
3047 Edition* 57 (12): 3064–68. <https://doi.org/10.1002/anie.201711242>.
- 3048 Ding, Ya, Ziwen Jiang, Krishnendu Saha, Chang Soo Kim, Sung Tae Kim, Ryan F Landis, and  
3049 Vincent M Rotello. 2014. "Gold Nanoparticles for Nucleic Acid Delivery." *Molecular  
3050 Therapy* 22 (6): 1075–83. <https://doi.org/10.1038/mt.2014.30>.
- 3051 Dowaidar, Moataz, Hani Nasser Abdelhamid, Mattias Hällbrink, Krista Freimann, Kaido Kurrikoff,  
3052 Xiaodong Zou, and Ülo Langel. 2017. "Magnetic Nanoparticle Assisted Self-Assembly of  
3053 Cell Penetrating Peptides-Oligonucleotides Complexes for Gene Delivery." *Scientific Reports*  
3054 7 (1): 9159. <https://doi.org/10.1038/s41598-017-09803-z>.
- 3055 Dowdy, Steven F. 2017. "Overcoming Cellular Barriers for RNA Therapeutics." *Nature  
3056 Biotechnology* 35 (3): 222–29. <https://doi.org/10.1038/nbt.3802>.
- 3057 Dowdy, Steven F., and Matthew Levy. 2018. "RNA Therapeutics (Almost) Comes of Age:  
3058 Targeting, Delivery and Endosomal Escape." *Nucleic Acid Therapeutics* 28 (3): 107–8.  
3059 <https://doi.org/10.1089/nat.2018.29001.dow>.
- 3060 Du Rietz, Hampus, Hampus Hedlund, Sten Wilhelmson, Pontus Nordenfelt, and Anders Wittrup.  
3061 2020. "Imaging Small Molecule-Induced Endosomal Escape of siRNA." *Nature  
3062 Communications* 11 (1): 1809. <https://doi.org/10.1038/s41467-020-15300-1>.
- 3063 Elghanian, R., J. J. Storhoff, R. C. Mucic, R. L. Letsinger, and C. A. Mirkin. 1997. "Selective  
3064 Colorimetric Detection of Polynucleotides Based on the Distance-Dependent Optical  
3065 Properties of Gold Nanoparticles." *Science (New York, N.Y.)* 277 (5329): 1078–81.  
3066 <https://doi.org/10.1126/science.277.5329.1078>.
- 3067 Ewers, Helge, Winfried Römer, Alicia E. Smith, Kirsten Bacia, Serge Dmitrieff, Wengang Chai,  
3068 Roberta Mancini, et al. 2010. "GM1 Structure Determines SV40-Induced Membrane  
3069 Invagination and Infection." *Nature Cell Biology* 12 (1): 11–18.  
3070 <https://doi.org/10.1038/ncb1999>.
- 3071 Fan, Ying, Jing Yao, Ronghui Du, Lin Hou, Jianping Zhou, Yun Lu, Qinggang Meng, and Qiang  
3072 Zhang. 2013. "Ternary Complexes with Core-Shell Bilayer for Double Level Targeted Gene  
3073 Delivery: In Vitro and In Vivo Evaluation." *Pharmaceutical Research* 30 (5): 1215–27.  
3074 <https://doi.org/10.1007/s11095-012-0960-9>.
- 3075 Faustino, R. S., T. J. Nelson, A. Terzic, and C. Perez-Terzic. 2007. "Nuclear Transport: Target for  
3076 Therapy." *Clinical Pharmacology and Therapeutics* 81 (6): 880–86.  
3077 <https://doi.org/10.1038/sj.clpt.6100141>.
- 3078 Favaro, Marianna Teixeira de Pinho, Ugutz Unzueta, Martí de Cabo, Antonio Villaverde, Neus  
3079 Ferrer-Miralles, and Adriano Rodrigues Azzoni. 2018. "Intracellular Trafficking of a Dynein-  
3080 Based Nanoparticle Designed for Gene Delivery." *European Journal of Pharmaceutical  
3081 Sciences* 112 (January): 71–78. <https://doi.org/10.1016/j.ejps.2017.11.002>.

## Virus Structure and Mechanism Inform the Design of Nucleic Acid Delivery Systems

- 3082 Favaro, M.T.P., M.A.S. de Toledo, R.F. Alves, C.A. Santos, L.L. Beloti, R. Janissen, L.G. de la  
3083 Torre, A.P. Souza, and A.R. Azzoni. 2014. "Development of a Non-Viral Gene Delivery  
3084 Vector Based on the Dynein Light Chain Rp3 and the TAT Peptide." *Journal of*  
3085 *Biotechnology* 173 (March): 10–18. <https://doi.org/10.1016/j.jbiotec.2014.01.001>.
- 3086 Fay, Nikta, and Nelly Panté. 2015. "Nuclear Entry of DNA Viruses." *Frontiers in Microbiology* 6  
3087 (May). <https://doi.org/10.3389/fmicb.2015.00467>.
- 3088 Fire, Andrew, SiQun Xu, Mary K. Montgomery, Steven A. Kostas, Samuel E. Driver, and Craig C.  
3089 Mello. 1998. "Potent and Specific Genetic Interference by Double-Stranded RNA in  
3090 *Caenorhabditis Elegans*." *Nature* 391 (6669): 806–11. <https://doi.org/10.1038/35888>.
- 3091 Flint, J.; Racaniello, V.R.; Rall, G.F.; Skalka, M. Enquist, W. n.d. *Principles of Virology, 2 Volume*  
3092 *Set, 4th Edition | Wiley*. Accessed September 28, 2020. [https://www.wiley.com/en-](https://www.wiley.com/en-us/Principles+of+Virology%2C+2+Volume+Set%2C+4th+Edition-p-9781555819514)  
3093 [us/Principles+of+Virology%2C+2+Volume+Set%2C+4th+Edition-p-9781555819514](https://www.wiley.com/en-us/Principles+of+Virology%2C+2+Volume+Set%2C+4th+Edition-p-9781555819514).
- 3094 Fouriki, Angeliki, and Jon Dobson. 2014. "Oscillating Magnet Array-Based Nanomagnetic Gene  
3095 Transfection of Human Mesenchymal Stem Cells." *Nanomedicine (London, England)* 9 (7):  
3096 989–97. <https://doi.org/10.2217/nnm.13.74>.
- 3097 Friedman, Adam, Sarah Claypool, and Rihe Liu. 2013. "The Smart Targeting of Nanoparticles."  
3098 *Current Pharmaceutical Design* 19 (35): 6315–29.  
3099 <https://doi.org/10.2174/13816128113199990375>.
- 3100 Fu, Yu, and Jinming Li. 2016. "A Novel Delivery Platform Based on Bacteriophage MS2 Virus-like  
3101 Particles." *Virus Research* 211 (January): 9–16.  
3102 <https://doi.org/10.1016/j.virusres.2015.08.022>.
- 3103 Galaway, Francis A., and Peter G. Stockley. 2013. "MS2 Viruslike Particles: A Robust,  
3104 Semisynthetic Targeted Drug Delivery Platform." *Molecular Pharmaceutics* 10 (1): 59–68.  
3105 <https://doi.org/10.1021/mp3003368>.
- 3106 Ghasemiyeh, Parisa, and Soliman Mohammadi-Samani. 2018. "Solid Lipid Nanoparticles and  
3107 Nanostructured Lipid Carriers as Novel Drug Delivery Systems: Applications, Advantages  
3108 and Disadvantages." *Research in Pharmaceutical Sciences* 13 (4): 288–303.  
3109 <https://doi.org/10.4103/1735-5362.235156>.
- 3110 Gillard, Marianne, Zhongfan Jia, Jeff Jia Cheng Hou, Michael Song, Peter P. Gray, Trent P. Munro,  
3111 and Michael J. Monteiro. 2014. "Intracellular Trafficking Pathways for Nuclear Delivery of  
3112 Plasmid DNA Complexed with Highly Efficient Endosome Escape Polymers."  
3113 *Biomacromolecules* 15 (10): 3569–76. <https://doi.org/10.1021/bm5008376>.
- 3114 Gilleron, Jerome, Prasath Paramasivam, Anja Zeigerer, William Querbes, Giovanni Marsico, Cordula  
3115 Andree, Sarah Seifert, et al. 2015. "Identification of siRNA Delivery Enhancers by a  
3116 Chemical Library Screen." *Nucleic Acids Research* 43 (16): 7984–8001.  
3117 <https://doi.org/10.1093/nar/gkv762>.
- 3118 Gilleron, Jerome, William Querbes, Anja Zeigerer, Anna Borodovsky, Giovanni Marsico, Undine  
3119 Schubert, Kevin Manygoats, et al. 2013. "Image-Based Analysis of Lipid Nanoparticle-  
3120 Mediated siRNA Delivery, Intracellular Trafficking and Endosomal Escape." *Nature*  
3121 *Biotechnology* 31 (7): 638–46. <https://doi.org/10.1038/nbt.2612>.
- 3122 Greber, U F, M Suomalainen, R P Stidwill, K Boucke, M W Ebersold, and A Helenius. 1997. "The  
3123 Role of the Nuclear Pore Complex in Adenovirus DNA Entry." *The EMBO Journal* 16 (19):  
3124 5998–6007. <https://doi.org/10.1093/emboj/16.19.5998>.



## Virus Structure and Mechanism Inform the Design of Nucleic Acid Delivery Systems

- 3125 Greber, Urs F. 2016. "Virus and Host Mechanics Support Membrane Penetration and Cell Entry."  
3126 *Journal of Virology* 90 (8): 3802–5. <https://doi.org/10.1128/JVI.02568-15>.
- 3127 Gudipati, Saketh, Ke Zhang, and Jessica L. Rouge. 2019. "Towards Self-Transfecting Nucleic Acid  
3128 Nanostructures for Gene Regulation." *Trends in Biotechnology* 37 (9): 983–94.  
3129 <https://doi.org/10.1016/j.tibtech.2019.01.008>.
- 3130 Hannon, Gregory J. 2002. "RNA Interference." *Nature* 418 (6894): 244–51.  
3131 <https://doi.org/10.1038/418244a>.
- 3132 Hao, Xuefang, Qian Li, Jintang Guo, Xiangkui Ren, Yakai Feng, Changcan Shi, and Wencheng  
3133 Zhang. 2017. "Multifunctional Gene Carriers with Enhanced Specific Penetration and  
3134 Nucleus Accumulation to Promote Neovascularization of HUVECs in Vivo." *ACS Applied*  
3135 *Materials & Interfaces* 9 (41): 35613–27. <https://doi.org/10.1021/acsami.7b11615>.
- 3136 Hartmann, Alyssa K., Dominic F. Cairns-Gibson, Joshua J. Santiana, Mark Q. Tolentino, Halle M.  
3137 Barber, and Jessica L. Rouge. 2018. "Enzymatically Ligated DNA–Surfactants: Unmasking  
3138 Hydrophobically Modified DNA for Intracellular Gene Regulation." *ChemBioChem* 19 (16):  
3139 1734–39. <https://doi.org/10.1002/cbic.201800302>.
- 3140 Hartmann, Alyssa K., Saketh Gudipati, Andrea Pettenuzzo, Luca Ronconi, and Jessica L. Rouge.  
3141 2020. "Chimeric SiRNA-DNA Surfactants for the Enhanced Delivery and Sustained  
3142 Cytotoxicity of a Gold(III) Metallodrug." *Bioconjugate Chemistry* 31 (4): 1063–69.  
3143 <https://doi.org/10.1021/acs.bioconjchem.0c00047>.
- 3144 Hoy, Sheridan M. 2018. "Patisiran: First Global Approval." *Drugs* 78 (15): 1625–31.  
3145 <https://doi.org/10.1007/s40265-018-0983-6>.
- 3146 Huang, Keyang, Huili Ma, Juan Liu, Shuaidong Huo, Anil Kumar, Tuo Wei, Xu Zhang, et al. 2012.  
3147 "Size-Dependent Localization and Penetration of Ultrasmall Gold Nanoparticles in Cancer  
3148 Cells, Multicellular Spheroids, and Tumors in Vivo." *ACS Nano* 6 (5): 4483–93.  
3149 <https://doi.org/10.1021/nn301282m>.
- 3150 Huggins, Ian J., Carlos A. Medina, Aaron D. Springer, Arjen van den Berg, Satish Jadhav, Xianshu  
3151 Cui, and Steven F. Dowdy. 2019. "Site Selective Antibody-Oligonucleotide Conjugation via  
3152 Microbial Transglutaminase." *Molecules (Basel, Switzerland)* 24 (18).  
3153 <https://doi.org/10.3390/molecules24183287>.
- 3154 Huo, Shuaidong, Shubin Jin, Xiaowei Ma, Xiangdong Xue, Keni Yang, Anil Kumar, Paul C. Wang,  
3155 Jinchao Zhang, Zhongbo Hu, and Xing-Jie Liang. 2014. "Ultrasmall Gold Nanoparticles as  
3156 Carriers for Nucleus-Based Gene Therapy Due to Size-Dependent Nuclear Entry." *ACS Nano*  
3157 8 (6): 5852–62. <https://doi.org/10.1021/nn5008572>.
- 3158 Jeffs, Lloyd B., Lorne R. Palmer, Ellen G. Ambegia, Cory Giesbrecht, Shannon Ewanick, and Ian  
3159 MacLachlan. 2005. "A Scalable, Extrusion-Free Method for Efficient Liposomal  
3160 Encapsulation of Plasmid DNA." *Pharmaceutical Research* 22 (3): 362–72.  
3161 <https://doi.org/10.1007/s11095-004-1873-z>.
- 3162 Jiang, Shan, Ahmed A. Eltoukhy, Kevin T. Love, Robert Langer, and Daniel G. Anderson. 2013.  
3163 "Lipidoid-Coated Iron Oxide Nanoparticles for Efficient DNA and SiRNA Delivery." *Nano*  
3164 *Letters* 13 (3): 1059–64. <https://doi.org/10.1021/nl304287a>.
- 3165 Jiang, Ying, Joseph Hardie, Yuanchang Liu, Moumita Ray, Xiang Luo, Riddha Das, Ryan F. Landis,  
3166 Michelle Farkas, and Vincent M. Rotello. 2018. "Nanocapsule-Mediated Cytosolic SiRNA  
3167 Delivery for Anti-Inflammatory Treatment." *Journal of Controlled Release: Official Journal*

## Virus Structure and Mechanism Inform the Design of Nucleic Acid Delivery Systems

- 3168 *of the Controlled Release Society* 283 (August): 235–40.  
3169 <https://doi.org/10.1016/j.jconrel.2018.06.001>.
- 3170 Jiang, Ying, Rui Tang, Bradley Duncan, Ziwen Jiang, Bo Yan, Rubul Mout, and Vincent M. Rotello.  
3171 2015. “Direct Cytosolic Delivery of siRNA Using Nanoparticle-Stabilized Nanocapsules.”  
3172 *Angewandte Chemie (International Ed. in English)* 54 (2): 506–10.  
3173 <https://doi.org/10.1002/anie.201409161>.
- 3174 Jin, Rongchao, Guosheng Wu, Zhi Li, Chad A. Mirkin, and George C. Schatz. 2003. “What Controls  
3175 the Melting Properties of DNA-Linked Gold Nanoparticle Assemblies?” *Journal of the*  
3176 *American Chemical Society* 125 (6): 1643–54. <https://doi.org/10.1021/ja021096v>.
- 3177 Johannes, Ludger, and Marco Lucchino. 2018. “Current Challenges in Delivery and Cytosolic  
3178 Translocation of Therapeutic RNAs.” *Nucleic Acid Therapeutics* 28 (3): 178–93.  
3179 <https://doi.org/10.1089/nat.2017.0716>.
- 3180 Joris, Freya, Lynn De Backer, Thijs Van de Vyver, Chiara Bastiancich, Stefaan C. De Smedt, and  
3181 Koen Raemdonck. 2018. “Repurposing Cationic Amphiphilic Drugs as Adjuvants to Induce  
3182 Lysosomal siRNA Escape in Nanogel Transfected Cells.” *Journal of Controlled Release* 269  
3183 (January): 266–76. <https://doi.org/10.1016/j.jconrel.2017.11.019>.
- 3184 Juliano, R.L. 2018. “Intracellular Trafficking and Endosomal Release of Oligonucleotides: What We  
3185 Know and What We Don’t.” *Nucleic Acid Therapeutics* 28 (3): 166–77.  
3186 <https://doi.org/10.1089/nat.2018.0727>.
- 3187 Juliano, Rudolph L. 2016. “The Delivery of Therapeutic Oligonucleotides.” *Nucleic Acids Research*  
3188 44 (14): 6518–48. <https://doi.org/10.1093/nar/gkw236>.
- 3189 Juliano, Rudolph L, Ling Wang, Francis Tavares, Edward G Brown, Lindsey James, Yamuna  
3190 Ariyarathna, Xin Ming, Chengqiong Mao, and Mark Suto. 2018. “Structure–Activity  
3191 Relationships and Cellular Mechanism of Action of Small Molecules That Enhance the  
3192 Delivery of Oligonucleotides.” *Nucleic Acids Research* 46 (4): 1601–13.  
3193 <https://doi.org/10.1093/nar/gkx1320>.
- 3194 Juliano, Rudy, Md Rowshon Alam, Vidula Dixit, and Hyumin Kang. 2008. “Mechanisms and  
3195 Strategies for Effective Delivery of Antisense and siRNA Oligonucleotides.” *Nucleic Acids*  
3196 *Research* 36 (12): 4158–71. <https://doi.org/10.1093/nar/gkn342>.
- 3197 Juliano, Rudy L, Xin Ming, Osamu Nakagawa, Rongzuo Xu, and Hoon Yoo. 2011. “Integrin  
3198 Targeted Delivery of Gene Therapeutics.” *Theranostics* 1 (March): 211–19.  
3199 <https://doi.org/10.7150/thno/v01p0211>.
- 3200 Kang, Hyunmin, Rowshon Alam, Vidula Dixit, Michael Fisher, and Rudy L Juliano. 2008. “Cellular  
3201 Delivery and Biological Activity of Antisense Oligonucleotides Conjugated to a Targeted  
3202 Protein Carrier.” *Bioconjugate Chemistry* 19 (11): 2182–88.  
3203 <https://doi.org/10.1021/bc800270w>.
- 3204 Kang, Ziyao, Qingbin Meng, and Keliang Liu. 2019. “Peptide-Based Gene Delivery Vectors.”  
3205 *Journal of Materials Chemistry B* 7 (11): 1824–41. <https://doi.org/10.1039/C8TB03124J>.
- 3206 Karkare, Shantanu, and Deepak Bhatnagar. 2006. “Promising Nucleic Acid Analogs and Mimics:  
3207 Characteristic Features and Applications of PNA, LNA, and Morpholino.” *Applied*  
3208 *Microbiology and Biotechnology* 71 (5): 575–86. <https://doi.org/10.1007/s00253-006-0434-2>.
- 3209 Khan, Nabab, Peter W. Halcrow, Koffi L. Lakpa, Zahra Afghah, Nicole M. Miller, Steven F. Dowdy,  
3210 Jonathan D. Geiger, and Xuesong Chen. 2020. “Two-Pore Channels Regulate Tat

## Virus Structure and Mechanism Inform the Design of Nucleic Acid Delivery Systems

- 3211 Endolysosome Escape and Tat-Mediated HIV-1 LTR Transactivation.” *FASEB Journal: Official Publication of the Federation of American Societies for Experimental Biology* 34 (3): 3212 4147–62. <https://doi.org/10.1096/fj.201902534R>.
- 3213
- 3214 Kilchrist, Kameron V., Somtochukwu C. Dimobi, Meredith A. Jackson, Brian C. Evans, Thomas A. 3215 Werfel, Eric A. Dailing, Sean K. Bedingfield, Isom B. Kelly, and Craig L. Duvall. 2019. 3216 “Gal8 Visualization of Endosome Disruption Predicts Carrier-Mediated Biologic Drug 3217 Intracellular Bioavailability.” *ACS Nano* 13 (2): 1136–52. 3218 <https://doi.org/10.1021/acsnano.8b05482>.
- 3219 Kim, Yun Hak, Myoung-Eun Han, and Sae-Ock Oh. 2017. “The Molecular Mechanism for Nuclear 3220 Transport and Its Application.” *Anatomy & Cell Biology* 50 (2): 77. 3221 <https://doi.org/10.5115/acb.2017.50.2.77>.
- 3222 Krop, Ian E., Muralidhar Beeram, Shanu Modi, Suzanne F. Jones, Scott N. Holden, Wei Yu, Sandhya 3223 Girish, et al. 2010. “Phase I Study of Trastuzumab-DM1, an HER2 Antibody-Drug 3224 Conjugate, given Every 3 Weeks to Patients with HER2-Positive Metastatic Breast Cancer.” 3225 *Journal of Clinical Oncology: Official Journal of the American Society of Clinical Oncology* 3226 28 (16): 2698–2704. <https://doi.org/10.1200/JCO.2009.26.2071>.
- 3227 Kulkarni, Jayesh A., Pieter R. Cullis, and Roy van der Meel. 2018. “Lipid Nanoparticles Enabling 3228 Gene Therapies: From Concepts to Clinical Utility.” *Nucleic Acid Therapeutics* 28 (3): 146– 3229 57. <https://doi.org/10.1089/nat.2018.0721>.
- 3230 Kusumoto, Kenji, Hidetaka Akita, Taichi Ishitsuka, Yu Matsumoto, Takahiro Nomoto, Ryo 3231 Furukawa, Ayman El-Sayed, et al. 2013. “Lipid Envelope-Type Nanoparticle Incorporating a 3232 Multifunctional Peptide for Systemic siRNA Delivery to the Pulmonary Endothelium.” *ACS* 3233 *Nano* 7 (9): 7534–41. <https://doi.org/10.1021/nn401317t>.
- 3234 Kusumoto, Kenji, Hidetaka Akita, Sarochin Santiwarangkool, and Hideyoshi Harashima. 2014. 3235 “Advantages of Ethanol Dilution Method for Preparing GALA-Modified Liposomal siRNA 3236 Carriers on the in Vivo Gene Knockdown Efficiency in Pulmonary Endothelium.” 3237 *International Journal of Pharmaceutics* 473 (1–2): 144–47. 3238 <https://doi.org/10.1016/j.ijpharm.2014.07.007>.
- 3239 Lechardeur, D., K.-J. Sohn, M. Haardt, P. B. Joshi, M. Monck, R. W. Graham, B. Beatty, J. Squire, 3240 H. O’Brodoovich, and G. L. Lukacs. 1999. “Metabolic Instability of Plasmid DNA in the 3241 Cytosol: A Potential Barrier to Gene Transfer.” *Gene Therapy* 6 (4): 482–97. 3242 <https://doi.org/10.1038/sj.gt.3300867>.
- 3243 LeCher, Julia C., Scott J. Nowak, and Jonathan L. McMurry. 2017. “Breaking in and Busting out: 3244 Cell-Penetrating Peptides and the Endosomal Escape Problem.” *Biomolecular Concepts* 8 (3– 3245 4): 131–41. <https://doi.org/10.1515/bmc-2017-0023>.
- 3246 Li, Hongmei, Shann S. Yu, Martina Miteva, Christopher E. Nelson, Thomas Werfel, Todd D. 3247 Giorgio, and Craig L. Duvall. 2013. “Matrix Metalloproteinase Responsive, Proximity- 3248 Activated Polymeric Nanoparticles for siRNA Delivery.” *Advanced Functional Materials* 23 3249 (24): 3040–52. <https://doi.org/10.1002/adfm.201202215>.
- 3250 Li, Hui, Bohan Zhang, Xueguang Lu, Xuyu Tan, Fei Jia, Yue Xiao, Zehong Cheng, et al. 2018. 3251 “Molecular Spherical Nucleic Acids.” *Proceedings of the National Academy of Sciences of* 3252 *the United States of America* 115 (17): 4340–44. <https://doi.org/10.1073/pnas.1801836115>.
- 3253 Li, Yantao, Kai Zhang, Porun Liu, Mo Chen, Yulin Zhong, Qingsong Ye, Ming Q. Wei, Huijun 3254 Zhao, and Zhiyong Tang. 2019. “Encapsulation of Plasmid DNA by Nanoscale Metal–

## Virus Structure and Mechanism Inform the Design of Nucleic Acid Delivery Systems

- 3255 Organic Frameworks for Efficient Gene Transportation and Expression.” *Advanced Materials*  
3256 31 (29): 1901570. <https://doi.org/10.1002/adma.201901570>.
- 3257 Liang, Kang, Raffaele Ricco, Cara M. Doherty, Mark J. Styles, Stephen Bell, Nigel Kirby, Stephen  
3258 Mudie, et al. 2015. “Biomimetic Mineralization of Metal-Organic Frameworks as Protective  
3259 Coatings for Biomacromolecules.” *Nature Communications* 6 (1): 7240.  
3260 <https://doi.org/10.1038/ncomms8240>.
- 3261 Lo, Seong Loong, and Shu Wang. 2008. “An Endosomolytic Tat Peptide Produced by Incorporation  
3262 of Histidine and Cysteine Residues as a Nonviral Vector for DNA Transfection.”  
3263 *Biomaterials* 29 (15): 2408–14. <https://doi.org/10.1016/j.biomaterials.2008.01.031>.
- 3264 Lobovkina, Tatsiana, Gunilla B. Jacobson, Emilio Gonzalez Gonzalez, Robyn P. Hickerson, Devin  
3265 Leake, Roger L. Kaspar, Christopher H. Contag, and Richard N. Zare. 2011. “In Vivo  
3266 Sustained Release of SiRNA from Solid Lipid Nanoparticles.” *ACS Nano* 5 (12): 9977–83.  
3267 <https://doi.org/10.1021/nn203745n>.
- 3268 Loh, Xian Jun, Tung-Chun Lee, Qingqing Dou, and G. Roshan Deen. 2015. “Utilising Inorganic  
3269 Nanocarriers for Gene Delivery.” *Biomaterials Science* 4 (1): 70–86.  
3270 <https://doi.org/10.1039/C5BM00277J>.
- 3271 Lönn, Peter, Apollo D. Kacsinta, Xian-Shu Cui, Alexander S. Hamil, Manuel Kaulich, Khirud Gogoi,  
3272 and Steven F. Dowdy. 2016. “Enhancing Endosomal Escape for Intracellular Delivery of  
3273 Macromolecular Biologic Therapeutics.” *Scientific Reports* 6 (1): 32301.  
3274 <https://doi.org/10.1038/srep32301>.
- 3275 López-Huertas, María Rosa, Laura Jiménez-Tormo, Nadia Madrid-Elena, Carolina Gutiérrez, Sara  
3276 Rodríguez-Mora, Mayte Coiras, José Alcamí, and Santiago Moreno. 2017. “The CCR5-  
3277 Antagonist Maraviroc Reverses HIV-1 Latency in Vitro Alone or in Combination with the  
3278 PKC-Agonist Bryostatins-1.” *Scientific Reports* 7 (May). <https://doi.org/10.1038/s41598-017-02634-y>.
- 3280 Lv, Hongtao, Shubiao Zhang, Bing Wang, Shaohui Cui, and Jie Yan. 2006. “Toxicity of Cationic  
3281 Lipids and Cationic Polymers in Gene Delivery.” *Journal of Controlled Release* 114 (1):  
3282 100–109. <https://doi.org/10.1016/j.jconrel.2006.04.014>.
- 3283 Lytton-Jean, Abigail K. R., and Chad A. Mirkin. 2005. “A Thermodynamic Investigation into the  
3284 Binding Properties of DNA Functionalized Gold Nanoparticle Probes and Molecular  
3285 Fluorophore Probes.” *Journal of the American Chemical Society* 127 (37): 12754–55.  
3286 <https://doi.org/10.1021/ja052255o>.
- 3287 Mach, Robert H, Yunsheng Huang, Rebekah A Freeman, Li Wu, Suwanna Vangveravong, and  
3288 Robert R Luedtke. 2004. “Conformationally-Flexible Benzamide Analogues as Dopamine D3  
3289 and  $\Sigma 2$  Receptor Ligands.” *Bioorganic & Medicinal Chemistry Letters* 14 (1): 195–202.  
3290 <https://doi.org/10.1016/j.bmcl.2003.09.083>.
- 3291 Maginnis, Melissa S. 2018. “Virus–Receptor Interactions: The Key to Cellular Invasion.” *Journal of*  
3292 *Molecular Biology* 430 (17): 2590–2611. <https://doi.org/10.1016/j.jmb.2018.06.024>.
- 3293 Mallick, Sudipta, and Joon Sig Choi. 2014. “Liposomes: Versatile and Biocompatible Nanovesicles  
3294 for Efficient Biomolecules Delivery.” *Journal of Nanoscience and Nanotechnology* 14 (1):  
3295 755–65. <https://doi.org/10.1166/jnn.2014.9080>.
- 3296 Mammen, Mathai, Seok-Ki Choi, and George M. Whitesides. 1998. “Polyvalent Interactions in  
3297 Biological Systems: Implications for Design and Use of Multivalent Ligands and Inhibitors.”

## Virus Structure and Mechanism Inform the Design of Nucleic Acid Delivery Systems

- 3298 *Angewandte Chemie International Edition* 37 (20): 2754–94.  
3299 [https://doi.org/10.1002/\(SICI\)1521-3773\(19981102\)37:20<2754::AID-ANIE2754>3.0.CO;2-](https://doi.org/10.1002/(SICI)1521-3773(19981102)37:20<2754::AID-ANIE2754>3.0.CO;2-3)  
3300 3.
- 3301 Marsh, Mark, and Ari Helenius. 2006. “Virus Entry: Open Sesame.” *Cell* 124 (4): 729–40.  
3302 <https://doi.org/10.1016/j.cell.2006.02.007>.
- 3303 Massich, Matthew D., David A. Giljohann, Dwight S. Seferos, Louise E. Ludlow, Curt M. Horvath,  
3304 and Chad A. Mirkin. 2009. “Regulating Immune Response Using Polyvalent Nucleic Acid-  
3305 Gold Nanoparticle Conjugates.” *Molecular Pharmaceutics* 6 (6): 1934–40.  
3306 <https://doi.org/10.1021/mp900172m>.
- 3307 Maxfield, F. R. 1982. “Weak Bases and Ionophores Rapidly and Reversibly Raise the PH of  
3308 Endocytic Vesicles in Cultured Mouse Fibroblasts.” *The Journal of Cell Biology* 95 (2 Pt 1):  
3309 676–81. <https://doi.org/10.1083/jcb.95.2.676>.
- 3310 McBain, S. C., U. Griesenbach, S. Xenariou, A. Keramane, C. D. Batich, E. W. F. W. Alton, and J.  
3311 Dobson. 2008. “Magnetic Nanoparticles as Gene Delivery Agents: Enhanced Transfection in  
3312 the Presence of Oscillating Magnet Arrays.” *Nanotechnology* 19 (40): 405102.  
3313 <https://doi.org/10.1088/0957-4484/19/40/405102>.
- 3314 Mendes, Rita, Alexandra R. Fernandes, and Pedro V. Baptista. 2017. “Gold Nanoparticle Approach  
3315 to the Selective Delivery of Gene Silencing in Cancer—The Case for Combined Delivery?”  
3316 *Genes* 8 (3): 94. <https://doi.org/10.3390/genes8030094>.
- 3317 Midoux, Patrick, Lucie Pigeon, Cristine Gonçalves, and Chantal Pichon. 2017. “Peptides Mediating  
3318 DNA Transport on Microtubules and Their Impact on Non-Viral Gene Transfer Efficiency.”  
3319 *Bioscience Reports* 37 (5): BSR20170995. <https://doi.org/10.1042/BSR20170995>.
- 3320 Miller, Aaron M., and David A. Dean. 2009. “Tissue-Specific and Transcription Factor-Mediated  
3321 Nuclear Entry of DNA.” *Advanced Drug Delivery Reviews* 61 (7–8): 603–13.  
3322 <https://doi.org/10.1016/j.addr.2009.02.008>.
- 3323 Mirkin, Chad A., Robert L. Letsinger, Robert C. Mucic, and James J. Storhoff. 1996. “A DNA-Based  
3324 Method for Rationally Assembling Nanoparticles into Macroscopic Materials.” *Nature* 382  
3325 (6592): 607–9. <https://doi.org/10.1038/382607a0>.
- 3326 Mislick, K. A., and J. D. Baldeschwieler. 1996. “Evidence for the Role of Proteoglycans in Cation-  
3327 Mediated Gene Transfer.” *Proceedings of the National Academy of Sciences of the United*  
3328 *States of America* 93 (22): 12349–54. <https://doi.org/10.1073/pnas.93.22.12349>.
- 3329 Miyauchi, Kosuke, Yuri Kim, Olga Latinovic, Vladimir Morozov, and Gregory B. Melikyan. 2009.  
3330 “HIV Enters Cells via Endocytosis and Dynamin-Dependent Fusion with Endosomes.” *Cell*  
3331 137 (3): 433–44. <https://doi.org/10.1016/j.cell.2009.02.046>.
- 3332 Moffett, H. F., M. E. Coon, S. Radtke, S. B. Stephan, L. McKnight, A. Lambert, B. L. Stoddard, H.  
3333 P. Kiem, and M. T. Stephan. 2017. “Hit-and-Run Programming of Therapeutic Cytoreagents  
3334 Using mRNA Nanocarriers.” *Nature Communications* 8 (1): 389.  
3335 <https://doi.org/10.1038/s41467-017-00505-8>.
- 3336 Mout, Rubul, Moumita Ray, Gulen Yesilbag Tonga, Yi-Wei Lee, Tristan Tay, Kanae Sasaki, and  
3337 Vincent M. Rotello. 2017. “Direct Cytosolic Delivery of CRISPR/Cas9-Ribonucleoprotein  
3338 for Efficient Gene Editing.” *ACS Nano* 11 (3): 2452–58.  
3339 <https://doi.org/10.1021/acsnano.6b07600>.



## Virus Structure and Mechanism Inform the Design of Nucleic Acid Delivery Systems

- 3340 Mukherjee, Santanu, Cory M. Pfeifer, Jennifer M. Johnson, Jay Liu, and Adam Zlotnick. 2006.  
3341 “Redirecting the Coat Protein of a Spherical Virus to Assemble into Tubular Nanostructures.”  
3342 *Journal of the American Chemical Society* 128 (8): 2538–39.  
3343 <https://doi.org/10.1021/ja056656f>.
- 3344 Nair, Jayaprakash K., Jennifer L. S. Willoughby, Amy Chan, Klaus Charisse, Md. Rowshon Alam,  
3345 Qianfan Wang, Menno Hoekstra, et al. 2014. “Multivalent N-Acetylgalactosamine-  
3346 Conjugated siRNA Localizes in Hepatocytes and Elicits Robust RNAi-Mediated Gene  
3347 Silencing.” *Journal of the American Chemical Society* 136 (49): 16958–61.  
3348 <https://doi.org/10.1021/ja505986a>.
- 3349 Nanna, Alex R., Alexander V. Kel'in, Christopher Theile, Justin M. Pierson, Zhi Xiang Voo, Ashish  
3350 Garg, Jayaprakash K. Nair, Martin A. Maier, Kevin Fitzgerald, and Christoph Rader. 2020.  
3351 “Generation and Validation of Structurally Defined Antibody–siRNA Conjugates.” *Nucleic  
3352 Acids Research* 48 (10): 5281–93. <https://doi.org/10.1093/nar/gkaa286>.
- 3353 Nelemans, Levi Collin, and Leonid Gurevich. 2020. “Drug Delivery with Polymeric Nanocarriers—  
3354 Cellular Uptake Mechanisms.” *Materials* 13 (2). <https://doi.org/10.3390/ma13020366>.
- 3355 Nemerow, Glen R., and Phoebe L. Stewart. 1999. “Role of Av Integrins in Adenovirus Cell Entry  
3356 and Gene Delivery.” *Microbiology and Molecular Biology Reviews* 63 (3): 725–34.
- 3357 Neshatian, Mehrnoosh, Stephen Chung, Darren Yohan, Celina Yang, and Devika B. Chithrani. 2014.  
3358 “Determining the Size Dependence of Colloidal Gold Nanoparticle Uptake in a Tumor-like  
3359 Interface (Hypoxic).” *Colloids and Interface Science Communications* 1 (August): 57–61.  
3360 <https://doi.org/10.1016/j.colcom.2014.07.004>.
- 3361 Ngamcherdtrakul, Worapol, Jingga Morry, Shenda Gu, David J. Castro, Shaun M. Goodyear,  
3362 Thanapon Sangvanich, Moataz M. Reda, et al. 2015. “Cationic Polymer Modified  
3363 Mesoporous Silica Nanoparticles for Targeted siRNA Delivery to HER2+ Breast Cancer.”  
3364 *Advanced Functional Materials* 25 (18): 2646–59. <https://doi.org/10.1002/adfm.201404629>.
- 3365 Ni, Rong, Ruilu Feng, and Ying Chau. 2019. “Synthetic Approaches for Nucleic Acid Delivery:  
3366 Choosing the Right Carriers.” *Life (Basel, Switzerland)* 9 (3).  
3367 <https://doi.org/10.3390/life9030059>.
- 3368 Ni, Rong, Junli Zhou, Naushad Hossain, and Ying Chau. 2016. “Virus-Inspired Nucleic Acid  
3369 Delivery System: Linking Virus and Viral Mimicry.” *Advanced Drug Delivery Reviews* 106  
3370 (November): 3–26. <https://doi.org/10.1016/j.addr.2016.07.005>.
- 3371 Nie, Yu, David Schaffert, Wolfgang Rödl, Manfred Ogris, Ernst Wagner, and Michael Günther.  
3372 2011. “Dual-Targeted Polyplexes: One Step towards a Synthetic Virus for Cancer Gene  
3373 Therapy.” *Journal of Controlled Release, Symposium on Innovative Polymers for Controlled  
3374 Delivery*, 152 (1): 127–34. <https://doi.org/10.1016/j.jconrel.2011.02.028>.
- 3375 NI, Rosi, Giljohann Da, Thaxton Cs, Lytton-Jean Ak, Han Ms, and Mirkin Ca. 2006.  
3376 “Oligonucleotide-Modified Gold Nanoparticles for Intracellular Gene Regulation.” *Science  
3377 (New York, N.Y.)*. *Science*. May 19, 2006. <https://doi.org/10.1126/science.1125559>.
- 3378 Orellana, Esteban A., Ahmed M. Abdelaal, Loganathan Rangasamy, Srinivasarao Tenneti, Sunghyun  
3379 Myoung, Philip S. Low, and Andrea L. Kasinski. 2019. “Enhancing MicroRNA Activity  
3380 through Increased Endosomal Release Mediated by Nigericin.” *Molecular Therapy - Nucleic  
3381 Acids* 16 (June): 505–18. <https://doi.org/10.1016/j.omtn.2019.04.003>.

## Virus Structure and Mechanism Inform the Design of Nucleic Acid Delivery Systems

- 3382 Orellana, Esteban A., Srinivasarao Tenneti, Loganathan Rangasamy, L. Tiffany Lyle, Philip S. Low,  
3383 and Andrea L. Kasinski. 2017. "FolamiRs: Ligand-Targeted, Vehicle-Free Delivery of  
3384 MicroRNAs for the Treatment of Cancer." *Science Translational Medicine* 9 (401).  
3385 <https://doi.org/10.1126/scitranslmed.aam9327>.
- 3386 Ortega-Esteban, Alvaro, Gabriela N. Condezo, Ana J. Pérez-Berná, Miguel Chillón, S. Jane Flint,  
3387 David Reguera, Carmen San Martín, and Pedro J. de Pablo. 2015. "Mechanics of Viral  
3388 Chromatin Reveals the Pressurization of Human Adenovirus." *ACS Nano* 9 (11): 10826–33.  
3389 <https://doi.org/10.1021/acsnano.5b03417>.
- 3390 Osborn, Maire F., Julia F. Alterman, Mehran Nikan, Hong Cao, Marie C. Didiot, Matthew R.  
3391 Hassler, Andrew H. Coles, and Anastasia Khvorova. 2015. "Guanabenz (Wytensin<sup>TM</sup>)  
3392 Selectively Enhances Uptake and Efficacy of Hydrophobically Modified SiRNAs." *Nucleic  
3393 Acids Research* 43 (18): 8664–72. <https://doi.org/10.1093/nar/gkv942>.
- 3394 Palanca-Wessels, Maria C., Anthony J. Convertine, Richelle Cutler-Strom, Garrett C. Booth, Fan  
3395 Lee, Geoffrey Y. Berguig, Patrick S. Stayton, and Oliver W. Press. 2011. "Anti-CD22  
3396 Antibody Targeting of PH-Responsive Micelles Enhances Small Interfering RNA Delivery  
3397 and Gene Silencing in Lymphoma Cells." *Molecular Therapy: The Journal of the American  
3398 Society of Gene Therapy* 19 (8): 1529–37. <https://doi.org/10.1038/mt.2011.104>.
- 3399 Pan, Limin, Qianjun He, Jianan Liu, Yu Chen, Ming Ma, Linlin Zhang, and Jianlin Shi. 2012.  
3400 "Nuclear-Targeted Drug Delivery of TAT Peptide-Conjugated Monodisperse Mesoporous  
3401 Silica Nanoparticles." *Journal of the American Chemical Society* 134 (13): 5722–25.  
3402 <https://doi.org/10.1021/ja211035w>.
- 3403 Pan, Limin, Jianan Liu, and Jianlin Shi. 2018. "Cancer Cell Nucleus-Targeting Nanocomposites for  
3404 Advanced Tumor Therapeutics." *Chemical Society Reviews* 47 (18): 6930–46.  
3405 <https://doi.org/10.1039/C8CS00081F>.
- 3406 Pan, Yang, Tingting Jia, Yuan Zhang, Kuo Zhang, Rui Zhang, Jinming Li, and Lunan Wang. 2012.  
3407 "MS2 VLP-Based Delivery of MicroRNA-146a Inhibits Autoantibody Production in Lupus-  
3408 Prone Mice." *International Journal of Nanomedicine* 7: 5957–67.  
3409 <https://doi.org/10.2147/IJN.S37990>.
- 3410 Pan, Yang, Yuan Zhang, Tingting Jia, Kuo Zhang, Jinming Li, and Lunan Wang. 2012.  
3411 "Development of a MicroRNA Delivery System Based on Bacteriophage MS2 Virus-like  
3412 Particles." *The FEBS Journal* 279 (7): 1198–1208. <https://doi.org/10.1111/j.1742-4658.2012.08512.x>.
- 3414 Peng, Shuang, Binglin Bie, Yangzesheng Sun, Min Liu, Hengjiang Cong, Wentao Zhou, Yucong  
3415 Xia, Heng Tang, Hexiang Deng, and Xiang Zhou. 2018. "Metal-Organic Frameworks for  
3416 Precise Inclusion of Single-Stranded DNA and Transfection in Immune Cells." *Nature  
3417 Communications* 9 (1): 1293. <https://doi.org/10.1038/s41467-018-03650-w>.
- 3418 Penin, François, Christophe Combet, Georgios Germanidis, Pierre-Olivier Frainais, Gilbert Deléage,  
3419 and Jean-Michel Pawlotsky. 2001. "Conservation of the Conformation and Positive Charges  
3420 of Hepatitis C Virus E2 Envelope Glycoprotein Hypervariable Region 1 Points to a Role in  
3421 Cell Attachment." *Journal of Virology* 75 (12): 5703–10.  
3422 <https://doi.org/10.1128/JVI.75.12.5703-5710.2001>.
- 3423 Pinto, Lawrence H., Leslie J. Holsinger, and Robert A. Lamb. 1992. "Influenza Virus M2 Protein  
3424 Has Ion Channel Activity." *Cell* 69 (3): 517–28. [https://doi.org/10.1016/0092-8674\(92\)90452-I](https://doi.org/10.1016/0092-8674(92)90452-I).

## Virus Structure and Mechanism Inform the Design of Nucleic Acid Delivery Systems

- 3426 Poddar, Arpita, José J. Conesa, Kang Liang, Sudip Dhakal, Philipp Reineck, Gary Bryant, Eva  
3427 Pereira, et al. 2019. "Encapsulation, Visualization and Expression of Genes with  
3428 Biomimetically Mineralized Zeolitic Imidazolate Framework-8 (ZIF-8)." *Small* 15 (36):  
3429 1902268. <https://doi.org/10.1002/sml.201902268>.
- 3430 Pouton, C, K Wagstaff, D Roth, G Moseley, and D Jans. 2007. "Targeted Delivery to the Nucleus☆."  
3431 *Advanced Drug Delivery Reviews* 59 (8): 698–717.  
3432 <https://doi.org/10.1016/j.addr.2007.06.010>.
- 3433 Prel, Anne, Vincent Caval, Régis Gayon, Philippe Ravassard, Christine Duthoit, Emmanuel Payen,  
3434 Leila Maouche-Chretien, et al. 2015. "Highly Efficient in Vitro and in Vivo Delivery of  
3435 Functional RNAs Using New Versatile MS2-Chimeric Retrovirus-like Particles." *Molecular*  
3436 *Therapy - Methods & Clinical Development* 2 (January): 15039.  
3437 <https://doi.org/10.1038/mtm.2015.39>.
- 3438 Pretto, Chiara, and Jan C. M. van Hest. 2019. "Versatile Reversible Cross-Linking Strategy to  
3439 Stabilize CCMV Virus Like Particles for Efficient siRNA Delivery." *Bioconjugate Chemistry*  
3440 30 (12): 3069–77. <https://doi.org/10.1021/acs.bioconjchem.9b00731>.
- 3441 Qiu, Liping, Tao Chen, Ismail Öçsoy, Emir Yasun, Cuichen Wu, Guizhi Zhu, Mingxu You, et al.  
3442 2015. "A Cell-Targeted, Size-Photocontrollable, Nuclear-Uptake Nanodrug Delivery System  
3443 for Drug-Resistant Cancer Therapy." *Nano Letters* 15 (1): 457–63.  
3444 <https://doi.org/10.1021/nl503777s>.
- 3445 Ray, Moumita, Rui Tang, Ziwen Jiang, and Vincent M. Rotello. 2015. "Quantitative Tracking of  
3446 Protein Trafficking to the Nucleus Using Cytosolic Protein Delivery by Nanoparticle-  
3447 Stabilized Nanocapsules." *Bioconjugate Chemistry* 26 (6): 1004–7.  
3448 <https://doi.org/10.1021/acs.bioconjchem.5b00141>.
- 3449 Rohovie, Marcus J., Maya Nagasawa, and James R. Swartz. 2017. "Virus-like Particles: Next-  
3450 Generation Nanoparticles for Targeted Therapeutic Delivery." *Bioengineering &*  
3451 *Translational Medicine* 2 (1): 43–57. <https://doi.org/10.1002/btm2.10049>.
- 3452 Roldão, A., A.C. Silva, M.C.M. Mellado, P.M. Alves, and M.J.T. Carrondo. 2017. "Viruses and  
3453 Virus-Like Particles in Biotechnology: Fundamentals and Applications." *Comprehensive*  
3454 *Biotechnology*, 633–56. <https://doi.org/10.1016/B978-0-12-809633-8.09046-4>.
- 3455 Roloff, Alexander, David A. Nelles, Matthew P. Thompson, Gene W. Yeo, and Nathan C.  
3456 Gianneschi. 2018. "Self-Transfecting Micellar RNA: Modulating Nanoparticle Cell  
3457 Interactions via High Density Display of Small Molecule Ligands on Micelle Coronas."  
3458 *Bioconjugate Chemistry* 29 (1): 126–35. <https://doi.org/10.1021/acs.bioconjchem.7b00657>.
- 3459 Ruan, Weimin, Meng Zheng, Yang An, Yuanyuan Liu, David B. Lovejoy, Mingcong Hao, Yan Zou,  
3460 et al. 2018. "DNA Nanoclew Templated Spherical Nucleic Acids for siRNA Delivery."  
3461 *Chemical Communications* 54 (29): 3609–12. <https://doi.org/10.1039/C7CC09257A>.
- 3462 Rush, Anthony M., Matthew P. Thompson, Erick T. Tatro, and Nathan C. Gianneschi. 2013.  
3463 "Nuclease-Resistant DNA via High-Density Packing in Polymeric Micellar Nanoparticle  
3464 Coronas." *ACS Nano* 7 (2): 1379–87. <https://doi.org/10.1021/nn305030g>.
- 3465 Russell, W. C. 2009. "Adenoviruses: Update on Structure and Function." *The Journal of General*  
3466 *Virology* 90 (Pt 1): 1–20. <https://doi.org/10.1099/vir.0.003087-0>.
- 3467 Sahay, Gaurav, William Querbes, Christopher Alabi, Ahmed Eltoukhy, Sovan Sarkar, Christopher  
3468 Zurenko, Emmanouil Karagiannis, et al. 2013. "Efficiency of siRNA Delivery by Lipid

## Virus Structure and Mechanism Inform the Design of Nucleic Acid Delivery Systems

- 3469 Nanoparticles Is Limited by Endocytic Recycling.” *Nature Biotechnology* 31 (7): 653–58.  
3470 <https://doi.org/10.1038/nbt.2614>.
- 3471 Santiana, Joshua J., Binglin Sui, Nicole Gomez, and Jessica L. Rouge. 2017. “Programmable  
3472 Peptide-Cross-Linked Nucleic Acid Nanocapsules as a Modular Platform for Enzyme  
3473 Specific Cargo Release.” *Bioconjugate Chemistry* 28 (12): 2910–14.  
3474 <https://doi.org/10.1021/acs.bioconjchem.7b00629>.
- 3475 Seferos, Dwight S., Andrew E. Prigodich, David A. Giljohann, Pinal C. Patel, and Chad A. Mirkin.  
3476 2009. “Polyvalent DNA Nanoparticle Conjugates Stabilize Nucleic Acids.” *Nano Letters* 9  
3477 (1): 308–11. <https://doi.org/10.1021/nl802958f>.
- 3478 Selby, Laura I., Christina M. Cortez-Jugo, Georgina K. Such, and Angus P. R. Johnston. 2017.  
3479 “Nanocapsulation: Progress toward Understanding the Endosomal Escape of Polymeric  
3480 Nanoparticles.” *Wiley Interdisciplinary Reviews. Nanomedicine and Nanobiotechnology* 9  
3481 (5). <https://doi.org/10.1002/wnan.1452>.
- 3482 Semple, Sean C., Akin Akinc, Jianxin Chen, Ammen P. Sandhu, Barbara L. Mui, Connie K. Cho,  
3483 Dinah W. Y. Sah, et al. 2010. “Rational Design of Cationic Lipids for siRNA Delivery.”  
3484 *Nature Biotechnology* 28 (2): 172–76. <https://doi.org/10.1038/nbt.1602>.
- 3485 Seth, Punit P., Michael Tanowitz, and C. Frank Bennett. 2019. “Selective Tissue Targeting of  
3486 Synthetic Nucleic Acid Drugs.” *The Journal of Clinical Investigation* 129 (3): 915–25.  
3487 <https://doi.org/10.1172/JCI125228>.
- 3488 Setten, Ryan L., John J. Rossi, and Si-ping Han. 2019. “The Current State and Future Directions of  
3489 RNAi-Based Therapeutics.” *Nature Reviews Drug Discovery* 18 (6): 421–46.  
3490 <https://doi.org/10.1038/s41573-019-0017-4>.
- 3491 Seynhaeve, Ann L.B., Bilyana M. Dicheva, Saske Hoving, Gerben A. Koning, and Timo L.M. ten  
3492 Hagen. 2013. “Intact Doxil Is Taken up Intracellularly and Released Doxorubicin Sequesters  
3493 in the Lysosome: Evaluated by in Vitro / in Vivo Live Cell Imaging.” *Journal of Controlled  
3494 Release* 172 (1): 330–40. <https://doi.org/10.1016/j.jconrel.2013.08.034>.
- 3495 Shaheen, Sharif M., Hidetaka Akita, Takashi Nakamura, Shota Takayama, Shiroh Futaki, Atsushi  
3496 Yamashita, Ryo Katoono, Nobuhiko Yui, and Hideyoshi Harashima. 2011. “KALA-Modified  
3497 Multi-Layered Nanoparticles as Gene Carriers for MHC Class-I Mediated Antigen  
3498 Presentation for a DNA Vaccine.” *Biomaterials* 32 (26): 6342–50.  
3499 <https://doi.org/10.1016/j.biomaterials.2011.05.014>.
- 3500 Shahzad, Mian M. K., Lingegowda S. Mangala, Hee Dong Han, Chunhua Lu, Justin Bottsford-  
3501 Miller, Masato Nishimura, Edna M. Mora, et al. 2011. “Targeted Delivery of Small  
3502 Interfering RNA Using Reconstituted High-Density Lipoprotein Nanoparticles.” *Neoplasia  
3503 (New York, N.Y.)* 13 (4): 309–19. <https://doi.org/10.1593/neo.101372>.
- 3504 Shete, Harshad K., Rashmi H. Prabhu, and Vandana B. Patravale. 2014. “Endosomal Escape: A  
3505 Bottleneck in Intracellular Delivery.” *Journal of Nanoscience and Nanotechnology* 14 (1):  
3506 460–74. <https://doi.org/10.1166/jnn.2014.9082>.
- 3507 Shi, Q., A T Nguyen, Y Angell, D Deng, C-R Na, K Burgess, D D Roberts, F C Brunicardi, and N S  
3508 Templeton. 2010. “A Combinatorial Approach for Targeted Delivery Using Small Molecules  
3509 and Reversible Masking to Bypass Nonspecific Uptake in Vivo.” *Gene Therapy* 17 (9): 1085–  
3510 97. <https://doi.org/10.1038/gt.2010.55>.

## Virus Structure and Mechanism Inform the Design of Nucleic Acid Delivery Systems

- 3511 Sieben, Christian, Erdinc Sezgin, Christian Eggeling, and Suliana Manley. 2018. "Influenza A  
3512 Viruses Use Multivalent Sialic Acid Clusters for Cell Binding and Receptor Activation."  
3513 *BioRxiv*, February, 264713. <https://doi.org/10.1101/264713>.
- 3514 Sievers, E. L., R. A. Larson, E. A. Stadtmauer, E. Estey, B. Löwenberg, H. Dombret, C. Karanes, et  
3515 al. 2001. "Efficacy and Safety of Gemtuzumab Ozogamicin in Patients with CD33-Positive  
3516 Acute Myeloid Leukemia in First Relapse." *Journal of Clinical Oncology: Official Journal of*  
3517 *the American Society of Clinical Oncology* 19 (13): 3244–54.  
3518 <https://doi.org/10.1200/JCO.2001.19.13.3244>.
- 3519 Sikorski, Aleksander F., Monika Toporkiewicz, Justyna Meissner, Lucyna Matusiewicz, and  
3520 Aleksander Czogalla. 2015. "Toward a Magic or Imaginary Bullet? Ligands for Drug  
3521 Targeting to Cancer Cells: Principles, Hopes, and Challenges." *International Journal of*  
3522 *Nanomedicine*, February, 1399. <https://doi.org/10.2147/IJN.S74514>.
- 3523 Simeoni, F. 2003. "Insight into the Mechanism of the Peptide-Based Gene Delivery System MPG:  
3524 Implications for Delivery of siRNA into Mammalian Cells." *Nucleic Acids Research* 31 (11):  
3525 2717–24. <https://doi.org/10.1093/nar/gkg385>.
- 3526 Sokolova, Viktoriya, and Matthias Epple. 2008. "Inorganic Nanoparticles as Carriers of Nucleic  
3527 Acids into Cells." *Angewandte Chemie (International Ed. in English)* 47 (8): 1382–95.  
3528 <https://doi.org/10.1002/anie.200703039>.
- 3529 Springer, Aaron D., and Steven F. Dowdy. 2018. "GalNAc-SiRNA Conjugates: Leading the Way for  
3530 Delivery of RNAi Therapeutics." *Nucleic Acid Therapeutics* 28 (3): 109–18.  
3531 <https://doi.org/10.1089/nat.2018.0736>.
- 3532 Staring, Jacqueline, Matthijs Raaben, and Thijn R. Brummelkamp. 2018. "Viral Escape from  
3533 Endosomes and Host Detection at a Glance." *Journal of Cell Science* 131 (15).  
3534 <https://doi.org/10.1242/jcs.216259>.
- 3535 Stewart, Phoebe L., and Glen R. Nemerow. 2007. "Cell Integrins: Commonly Used Receptors for  
3536 Diverse Viral Pathogens." *Trends in Microbiology* 15 (11): 500–507.  
3537 <https://doi.org/10.1016/j.tim.2007.10.001>.
- 3538 Subbarao, N. K., R. A. Parente, F. C. Szoka, L. Nadasdi, and K. Pongracz. 1987. "PH-Dependent  
3539 Bilayer Destabilization by an Amphipathic Peptide." *Biochemistry* 26 (11): 2964–72.  
3540 <https://doi.org/10.1021/bi00385a002>.
- 3541 Summerton, James E. 2006. "Morpholinos and PNAs Compared." In *Peptide Nucleic Acids,*  
3542 *Morpholinos and Related Antisense Biomolecules*, edited by Christopher G. Janson and  
3543 Matthew J. During, 89–113. Medical Intelligence Unit. Boston, MA: Springer US.  
3544 [https://doi.org/10.1007/0-387-32956-0\\_6](https://doi.org/10.1007/0-387-32956-0_6).
- 3545 Sun, Hongguang, Xun Zhu, Patrick Y. Lu, Roberto R. Rosato, Wen Tan, and Youli Zu. 2014.  
3546 "Oligonucleotide Aptamers: New Tools for Targeted Cancer Therapy." *Molecular Therapy -*  
3547 *Nucleic Acids* 3 (January). <https://doi.org/10.1038/mtna.2014.32>.
- 3548 Sun, Peng, Zhen Li, Jingyun Wang, Hui Gao, Xi Yang, Sudong Wu, Deqiang Liu, and Qixian Chen.  
3549 2018. "Transcellular Delivery of Messenger RNA Payloads by a Cationic Supramolecular  
3550 MOF Platform." *Chemical Communications* 54 (80): 11304–7.  
3551 <https://doi.org/10.1039/C8CC07047D>.
- 3552 Sun, Yujia, Liwei Zheng, Yu Yang, Xu Qian, Ting Fu, Xiaowei Li, Zunyi Yang, He Yan, Cheng Cui,  
3553 and Weihong Tan. 2020. "Metal–Organic Framework Nanocarriers for Drug Delivery in

## Virus Structure and Mechanism Inform the Design of Nucleic Acid Delivery Systems

- 3554 Biomedical Applications.” *Nano-Micro Letters* 12 (1): 103. [https://doi.org/10.1007/s40820-](https://doi.org/10.1007/s40820-020-00423-3)  
3555 [020-00423-3](https://doi.org/10.1007/s40820-020-00423-3).
- 3556 Takechi, Yuki, Hirokazu Tanaka, Hiroki Kitayama, Haruka Yoshii, Masafumi Tanaka, and Hiroyuki  
3557 Saito. 2012. “Comparative Study on the Interaction of Cell-Penetrating Polycationic Polymers  
3558 with Lipid Membranes.” *Chemistry and Physics of Lipids* 165 (1): 51–58.  
3559 <https://doi.org/10.1016/j.chemphyslip.2011.11.002>.
- 3560 Takemoto, Hiroyasu, Kanjiro Miyata, Nobuhiro Nishiyama, and Kazunori Kataoka. 2014. “Chapter  
3561 Ten - Bioresponsive Polymer-Based Nucleic Acid Carriers.” In *Advances in Genetics*, edited  
3562 by Leaf Huang, Dexi Liu, and Ernst Wagner, 88:289–323. Nonviral Vectors for Gene  
3563 Therapy. Academic Press. <https://doi.org/10.1016/B978-0-12-800148-6.00010-9>.
- 3564 Tang, Rui, Chang Soo Kim, David J. Solfiell, Subinoy Rana, Rubul Mout, Elih M. Velázquez-  
3565 Delgado, Apiwat Chompoosor, et al. 2013. “Direct Delivery of Functional Proteins and  
3566 Enzymes to the Cytosol Using Nanoparticle-Stabilized Nanocapsules.” *ACS Nano* 7 (8):  
3567 6667–73. <https://doi.org/10.1021/nn402753y>.
- 3568 Tang, Rui, Ming Wang, Moumita Ray, Ying Jiang, Ziwen Jiang, Qiaobing Xu, and Vincent M.  
3569 Rotello. 2017. “Active Targeting of the Nucleus Using Nonpeptidic Boronate Tags.” *Journal*  
3570 *of the American Chemical Society* 139 (25): 8547–51. <https://doi.org/10.1021/jacs.7b02801>.
- 3571 Tatsis, Nia, and Hildegund C. J. Ertl. 2004. “Adenoviruses as Vaccine Vectors.” *Molecular Therapy*  
3572 10 (4): 616–29. <https://doi.org/10.1016/j.ymthe.2004.07.013>.
- 3573 Taylor, Rebecca E., and Maliha Zahid. 2020. “Cell Penetrating Peptides, Novel Vectors for Gene  
3574 Therapy.” *Pharmaceutics* 12 (3): 225. <https://doi.org/10.3390/pharmaceutics12030225>.
- 3575 Teplensky, Michelle H., Marcus Fantham, Chetan Poudel, Colin Hockings, Meng Lu, Alina Guna,  
3576 Marta Aragonés-Anglada, et al. 2019. “A Highly Porous Metal-Organic Framework System  
3577 to Deliver Payloads for Gene Knockdown.” *Chem* 5 (11): 2926–41.  
3578 <https://doi.org/10.1016/j.chempr.2019.08.015>.
- 3579 Thomas, M., and A. M. Klibanov. 2003. “Non-Viral Gene Therapy: Polycation-Mediated DNA  
3580 Delivery.” *Applied Microbiology and Biotechnology* 62 (1): 27–34.  
3581 <https://doi.org/10.1007/s00253-003-1321-8>.
- 3582 Tiwari, Ashish, Ashutosh Singh, Neha Garg, and Jaspreet K. Randhawa. 2017. “Curcumin  
3583 Encapsulated Zeolitic Imidazolate Frameworks as Stimuli Responsive Drug Delivery System  
3584 and Their Interaction with Biomimetic Environment.” *Scientific Reports* 7 (1): 12598.  
3585 <https://doi.org/10.1038/s41598-017-12786-6>.
- 3586 Tolentino, Mark Q., Alyssa K. Hartmann, David T. Loe, and Jesssica L. Rouge. 2020. “Controlled  
3587 Release of Small Molecules and Proteins from DNA-Surfactant Stabilized Metal Organic  
3588 Frameworks.” *Journal of Materials Chemistry B*, May. <https://doi.org/10.1039/D0TB00767F>.
- 3589 Tomar, Raghuvir S., Hittu Matta, and Preet M. Chaudhary. 2003. “Use of Adeno-Associated Viral  
3590 Vector for Delivery of Small Interfering RNA.” *Oncogene* 22 (36): 5712–15.  
3591 <https://doi.org/10.1038/sj.onc.1206733>.
- 3592 Troiber, Christina, and Ernst Wagner. 2011. “Nucleic Acid Carriers Based on Precise Polymer  
3593 Conjugates.” *Bioconjugate Chemistry* 22 (9): 1737–52. <https://doi.org/10.1021/bc200251r>.
- 3594 Truong, Nghia P., Wenyi Gu, Indira Prasadam, Zhongfan Jia, Ross Crawford, Yin Xiao, and Michael  
3595 J. Monteiro. 2013. “An Influenza Virus-Inspired Polymer System for the Timed Release of  
3596 SiRNA.” *Nature Communications* 4 (1): 1902. <https://doi.org/10.1038/ncomms2905>.



## Virus Structure and Mechanism Inform the Design of Nucleic Acid Delivery Systems

- 3597 Urie, Russell, and Kaushal Rege. 2015. "Nanoscale Inorganic Scaffolds as Therapeutics and Delivery  
3598 Vehicles." *Current Opinion in Chemical Engineering*, Biological engineering / Materials  
3599 engineering, 7 (February): 120–28. <https://doi.org/10.1016/j.coche.2014.12.004>.
- 3600 Vickers, Kasey C., Brian T. Palmisano, Bassem M. Shoucri, Robert D. Shamburek, and Alan T.  
3601 Remaley. 2011. "MicroRNAs Are Transported in Plasma and Delivered to Recipient Cells by  
3602 High-Density Lipoproteins." *Nature Cell Biology* 13 (4): 423–33.  
3603 <https://doi.org/10.1038/ncb2210>.
- 3604 Villagrana-Escareño, María V., Elizabeth Reynaga-Hernández, Othir G. Galicia-Cruz, Ana L. Durán-  
3605 Meza, Viridiana De la Cruz-González, Carmen Y. Hernández-Carballo, and Jaime Ruíz-  
3606 García. 2019. "VLPs Derived from the CCMV Plant Virus Can Directly Transfect and  
3607 Deliver Heterologous Genes for Translation into Mammalian Cells." Edited by Lucia  
3608 Lopalco. *BioMed Research International* 2019 (October): 4630891.  
3609 <https://doi.org/10.1155/2019/4630891>.
- 3610 Volpers, Christoph, and Stefan Kochanek. 2004. "Adenoviral Vectors for Gene Transfer and  
3611 Therapy." *The Journal of Gene Medicine* 6 (S1): S164–71. <https://doi.org/10.1002/jgm.496>.
- 3612 Wagner, Ernst. 2012. "Polymers for siRNA Delivery: Inspired by Viruses to Be Targeted, Dynamic,  
3613 and Precise." *Accounts of Chemical Research* 45 (7): 1005–13.  
3614 <https://doi.org/10.1021/ar2002232>.
- 3615 Wang, Haitang, Yuen Yi C. Tam, Sam Chen, Josh Zaifman, Roy van der Meel, Marco A. Ciufolini,  
3616 and Pieter R. Cullis. 2016. "The Niemann-Pick C1 Inhibitor NP3.47 Enhances Gene  
3617 Silencing Potency of Lipid Nanoparticles Containing siRNA." *Molecular Therapy: The  
3618 Journal of the American Society of Gene Therapy* 24 (12): 2100–2108.  
3619 <https://doi.org/10.1038/mt.2016.179>.
- 3620 Wang, Ling, Yamuna Ariyaratna, Xin Ming, Bing Yang, Lindsey I. James, Silvia M. Kreda,  
3621 Melissa Porter, William Janzen, and Rudolph L. Juliano. 2017. "A Novel Family of Small  
3622 Molecules That Enhance the Intracellular Delivery and Pharmacological Effectiveness of  
3623 Antisense and Splice Switching Oligonucleotides." *ACS Chemical Biology* 12 (8): 1999–  
3624 2007. <https://doi.org/10.1021/acscchembio.7b00242>.
- 3625 Wang, Xin, David Y. Huang, Shu-Mei Huong, and Eng-Shang Huang. 2005. "Integrin  $\text{Av}\beta 3$  Is a  
3626 Coreceptor for Human Cytomegalovirus Infection." *Nature Medicine* 11 (5): 515–21.  
3627 <https://doi.org/10.1038/nm1236>.
- 3628 Wheeler, J. J., L. Palmer, M. Ossanlou, I. MacLachlan, R. W. Graham, Y. P. Zhang, M. J. Hope, P.  
3629 Scherrer, and P. R. Cullis. 1999. "Stabilized Plasmid-Lipid Particles: Construction and  
3630 Characterization." *Gene Therapy* 6 (2): 271–81. <https://doi.org/10.1038/sj.gt.3300821>.
- 3631 Wilen, Craig B., John C. Tilton, and Robert W. Doms. 2012. "Molecular Mechanisms of HIV Entry."  
3632 *Advances in Experimental Medicine and Biology* 726: 223–42. [https://doi.org/10.1007/978-1-4614-0980-9\\_10](https://doi.org/10.1007/978-1-4614-0980-9_10).
- 3634 Wilner, Samantha E, Brian Wengert, Keith Maier, Maria de Lourdes Borba Magalhães, David  
3635 Soriano Del Amo, Supriya Pai, Felipe Opazo, Silvio O Rizzoli, Amy Yan, and Matthew  
3636 Levy. 2012. "An RNA Alternative to Human Transferrin: A New Tool for Targeting Human  
3637 Cells." *Molecular Therapy. Nucleic Acids* 1 (5): e21. <https://doi.org/10.1038/mtna.2012.14>.
- 3638 Wood, Heather. 2018. "FDA Approves Patisiran to Treat Hereditary Transthyretin Amyloidosis."  
3639 *Nature Reviews Neurology* 14 (10): 570–570. <https://doi.org/10.1038/s41582-018-0065-0>.

## Virus Structure and Mechanism Inform the Design of Nucleic Acid Delivery Systems

- 3640 Wu, Meiyang, Qingshuo Meng, Yu Chen, Yanyan Du, Lingxia Zhang, Yaping Li, Linlin Zhang, and  
3641 Jianlin Shi. 2015. "Large-Pore Ultrasmall Mesoporous Organosilica Nanoparticles:  
3642 Micelle/Precursor Co-Templating Assembly and Nuclear-Targeted Gene Delivery." *Advanced Materials* 27 (2): 215–22. <https://doi.org/10.1002/adma.201404256>.  
3643
- 3644 Wyman, T. B., F. Nicol, O. Zelphati, P. V. Scaria, C. Plank, and F. C. Szoka. 1997. "Design,  
3645 Synthesis, and Characterization of a Cationic Peptide That Binds to Nucleic Acids and  
3646 Permeabilizes Bilayers." *Biochemistry* 36 (10): 3008–17. <https://doi.org/10.1021/bi9618474>.
- 3647 Xiang, Bai, Xue-Li Jia, Jin-Long Qi, Li-Ping Yang, Wei-Hong Sun, Xiao Yan, Shao-Kun Yang, De-  
3648 Ying Cao, Qing Du, and Xian-Rong Qi. 2017. "Enhancing siRNA-Based Cancer Therapy  
3649 Using a New PH-Responsive Activatable Cell-Penetrating Peptide-Modified Liposomal  
3650 System." *International Journal of Nanomedicine* Volume 12 (March): 2385–2405.  
3651 <https://doi.org/10.2147/IJN.S129574>.
- 3652 Xie, Xueping, Jinfeng Liao, Xiaoru Shao, Qianshun Li, and Yunfeng Lin. 2017. "The Effect of Shape  
3653 on Cellular Uptake of Gold Nanoparticles in the Forms of Stars, Rods, and Triangles." *Scientific Reports* 7 (1): 3827. <https://doi.org/10.1038/s41598-017-04229-z>.  
3654
- 3655 Xu, Dong, Doug McCarty, Alda Fernandes, Michael Fisher, R. J. Samulski, and R. L. Juliano. 2005.  
3656 "Delivery of MDR1 Small Interfering RNA by Self-Complementary Recombinant Adeno-  
3657 Associated Virus Vector." *Molecular Therapy* 11 (4): 523–30.  
3658 <https://doi.org/10.1016/j.ymthe.2004.12.019>.
- 3659 Xue, Hui Yi, Pengbo Guo, Wu-Cheng Wen, and Ho Lun Wong. 2015. "Lipid-Based Nanocarriers for  
3660 RNA Delivery." *Current Pharmaceutical Design* 21 (22): 3140–47.  
3661 <https://doi.org/10.2174/1381612821666150531164540>.
- 3662 Yamauchi, Yohei, and Urs F. Greber. 2016. "Principles of Virus Uncoating: Cues and the Snooker  
3663 Ball." *Traffic (Copenhagen, Denmark)* 17 (6): 569–92. <https://doi.org/10.1111/tra.12387>.
- 3664 Yan, Amy C., and Matthew Levy. 2018. "Aptamer-Mediated Delivery and Cell-Targeting Aptamers:  
3665 Room for Improvement." *Nucleic Acid Therapeutics* 28 (3): 194–99.  
3666 <https://doi.org/10.1089/nat.2018.0732>.
- 3667 Yang, B., X. Ming, C. Cao, B. Laing, A. Yuan, M. A. Porter, E. A. Hull-Ryde, et al. 2015. "High-  
3668 Throughput Screening Identifies Small Molecules That Enhance the Pharmacological Effects  
3669 of Oligonucleotides." *Nucleic Acids Research* 43 (4): 1987–96.  
3670 <https://doi.org/10.1093/nar/gkv060>.
- 3671 Yang, Xiao-Chao, Bappaditya Samanta, Sarit S. Agasti, Youngdo Jeong, Zheng-Jiang Zhu, Subinoy  
3672 Rana, Oscar R. Miranda, and Vincent M. Rotello. 2011. "Drug Delivery Using Nanoparticle-  
3673 Stabilized Nanocapsules." *Angewandte Chemie (International Ed. in English)* 50 (2): 477–81.  
3674 <https://doi.org/10.1002/anie.201005662>.
- 3675 Yao, Jing, Ying Fan, Yuanke Li, and Leaf Huang. 2013. "Strategies on the Nuclear-Targeted  
3676 Delivery of Genes." *Journal of Drug Targeting* 21 (10): 926–39.  
3677 <https://doi.org/10.3109/1061186X.2013.830310>.
- 3678 Yao, Yanlan, Tingting Jia, Yang Pan, Hongna Gou, Yulong Li, Yu Sun, Rui Zhang, et al. 2015.  
3679 "Using a Novel MicroRNA Delivery System to Inhibit Osteoclastogenesis." *International*  
3680 *Journal of Molecular Sciences* 16 (4): 8337–50. <https://doi.org/10.3390/ijms16048337>.
- 3681 Ye, She-fang, Miao-miao Tian, Tian-xiao Wang, Lei Ren, Dong Wang, Li-hua Shen, and Ting  
3682 Shang. 2012. "Synergistic Effects of Cell-Penetrating Peptide Tat and Fusogenic Peptide

## Virus Structure and Mechanism Inform the Design of Nucleic Acid Delivery Systems

- 3683 HA2-Enhanced Cellular Internalization and Gene Transduction of Organosilica  
3684 Nanoparticles.” *Nanomedicine: Nanotechnology, Biology and Medicine* 8 (6): 833–41.  
3685 <https://doi.org/10.1016/j.nano.2011.10.003>.
- 3686 Younes, Anas, Nancy L. Bartlett, John P. Leonard, Dana A. Kennedy, Carmel M. Lynch, Eric L.  
3687 Sievers, and Andres Forero-Torres. 2010. “Brentuximab Vedotin (SGN-35) for Relapsed  
3688 CD30-Positive Lymphomas.” *New England Journal of Medicine* 363 (19): 1812–21.  
3689 <https://doi.org/10.1056/NEJMoa1002965>.
- 3690 Young, Kaylie L., Alexander W. Scott, Liangliang Hao, Sarah E. Mirkin, Guoliang Liu, and Chad A.  
3691 Mirkin. 2012. “Hollow Spherical Nucleic Acids for Intracellular Gene Regulation Based upon  
3692 Biocompatible Silica Shells.” *Nano Letters* 12 (7): 3867–71.  
3693 <https://doi.org/10.1021/nl3020846>.
- 3694 Yuan, Weien, and Hui Li. 2017. “Polymer-Based Nanocarriers for Therapeutic Nucleic Acids  
3695 Delivery.” In book: *Nanostructures for Drug Delivery*, 445–60.  
3696 <https://doi.org/10.1016/B978-0-323-46143-6.00014-2>.
- 3697 Zatsepin, Timofei S, Yuri V Kotelevtsev, and Victor Koteliatsky. 2016. “Lipid Nanoparticles for  
3698 Targeted siRNA Delivery – Going from Bench to Bedside.” *International Journal of*  
3699 *Nanomedicine* 11 (July): 3077–86. <https://doi.org/10.2147/IJN.S106625>.
- 3700 Zhang, Jinming, Ruie Chen, Xiefan Fang, Fengqian Chen, Yitao Wang, and Meiwan Chen. 2015.  
3701 “Nucleolin Targeting AS1411 Aptamer Modified PH-Sensitive Micelles for Enhanced  
3702 Delivery and Antitumor Efficacy of Paclitaxel.” *Nano Research* 8 (1): 201–18.  
3703 <https://doi.org/10.1007/s12274-014-0619-4>.
- 3704 Zhao, Nianxi, Hitesh G Bagaria, Michael S Wong, and Youli Zu. 2011. “A Nanocomplex That Is  
3705 Both Tumor Cell-Selective and Cancer Gene-Specific for Anaplastic Large Cell Lymphoma.”  
3706 *Journal of Nanobiotechnology* 9 (January): 2. <https://doi.org/10.1186/1477-3155-9-2>.
- 3707 Zhu, Lin, and Ram I Mahato. 2010. “Lipid and Polymeric Carrier-Mediated Nucleic Acid Delivery.”  
3708 *Expert Opinion on Drug Delivery* 7 (10): 1209–26.  
3709 <https://doi.org/10.1517/17425247.2010.513969>.
- 3710 Zhu, Ya-Xuan, Hao-Ran Jia, Guang-Yu Pan, Nathan W. Ulrich, Zhan Chen, and Fu-Gen Wu. 2018.  
3711 “Development of a Light-Controlled Nanoplatfor for Direct Nuclear Delivery of Molecular  
3712 and Nanoscale Materials.” *Journal of the American Chemical Society* 140 (11): 4062–70.  
3713 <https://doi.org/10.1021/jacs.7b13672>.
- 3714 Zhuang, Jia, Chun-Hong Kuo, Lien-Yang Chou, De-Yu Liu, Eranthie Weerapana, and Chia-Kuang  
3715 Tsung. 2014. “Optimized Metal–Organic–Framework Nanospheres for Drug Delivery:  
3716 Evaluation of Small-Molecule Encapsulation.” *ACS Nano* 8 (3): 2812–19.  
3717 <https://doi.org/10.1021/nn406590q>.
- 3718
- 3719
- 3720
- 3721
- 3722

Formatted: Indent: Left: 0", Hanging: 0.39"

**Virus Structure and Mechanism Inform the Design of Nucleic Acid Delivery Systems**

3723  
3724  
3725  
3726  
3727  
3728  
3729  
3730  
3731  
3732  
3733

Virus Structure and Mechanism Inform the Design of Nucleic Acid Delivery Systems

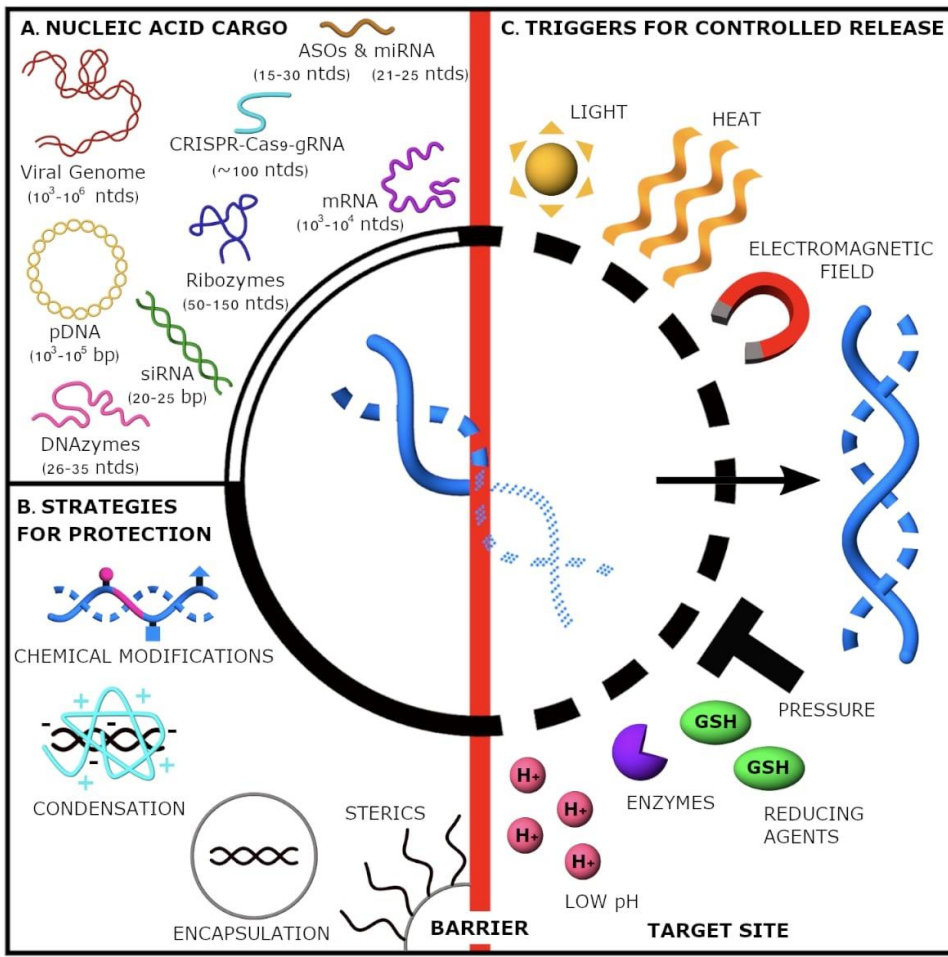

3734

## Virus Structure and Mechanism Inform the Design of Nucleic Acid Delivery Systems

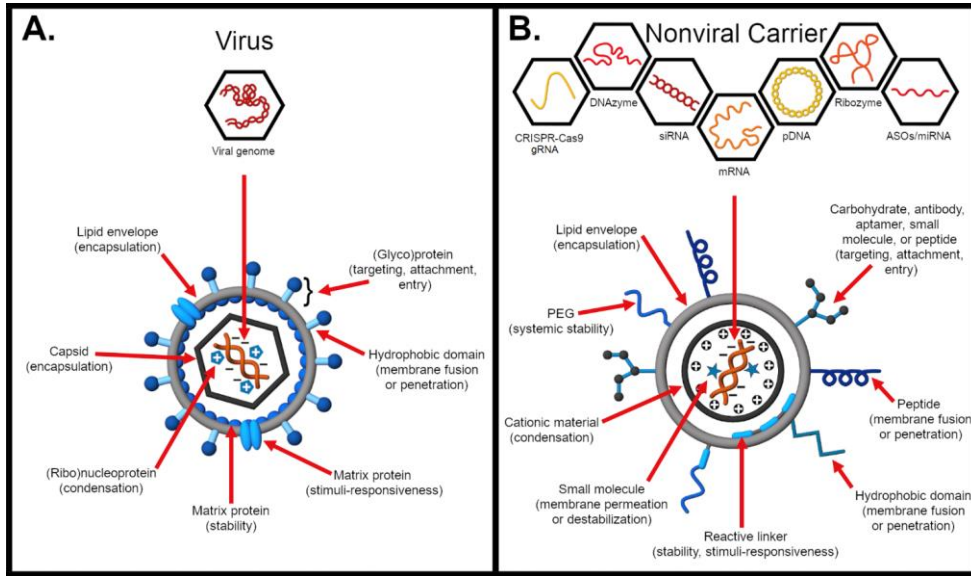

**Figure 1. An ideal nucleic acid carrier provides protection and controlled release.** **A.** Different types of nucleic acid cargo have a range of lengths that affect packaging, uptake, and intracellular fate. Viruses evolve to deliver their genome efficiently to the host cell for replication. As such, their genome encodes proteins essential for genome protection, tropism, intracellular trafficking, controlled genome release, and replication. **B.** Synthetic carriers are designed to deliver a diversity of therapeutic nucleic acid cargo including plasmid-DNA (pDNA), small interfering RNA (siRNA), antisense oligonucleotides (ASOs), microRNA (miRNA), messenger RNA (mRNA), CRISPR-Cas9 guide RNAs (gRNAs), ribozymes, and DNAzymes. Analogous to viruses, functional domains are embedded on the construct that enable a balance between nucleic acid protection and programmed, stimulus-induced release. **C.** Nucleic acid cargo may be protected via chemical modifications or conjugations, condensation, encapsulation, or molecular crowding. **D.** Controlled release is achieved by programming a carrier that responds to an external (e.g. light, heat, or electromagnetic field) or target-site specific stimulus.

Formatted: Font: Bold

Formatted: Font: Bold

Formatted: Font: Bold

Formatted: Font: Not Bold

Formatted: Font: Bold



## Virus Structure and Mechanism Inform the Design of Nucleic Acid Delivery Systems

3751  
3752  
3753  
3754

3755 **Table 1. Nucleic Acid Carriers: Properties and Trafficking**

| Vector                                  | Core Design                                                                                                               | Mode of Entry                                                                                                                     | Endosomal Escape Mechanism                                                             | Nuclear Targeting and Delivery                                                                                                                                  | Nucleic Acids Delivered   | Ref                                                                                                                                                                      |
|-----------------------------------------|---------------------------------------------------------------------------------------------------------------------------|-----------------------------------------------------------------------------------------------------------------------------------|----------------------------------------------------------------------------------------|-----------------------------------------------------------------------------------------------------------------------------------------------------------------|---------------------------|--------------------------------------------------------------------------------------------------------------------------------------------------------------------------|
| <b>Viruses and Virus-like Particles</b> |                                                                                                                           |                                                                                                                                   |                                                                                        |                                                                                                                                                                 |                           |                                                                                                                                                                          |
| <a href="#">AAV</a>                     | Nonenveloped, icosahedral capsid encapsulates nucleic acids<br>Size: 20-25 nm<br>Shape: icosahedron                       | Clathrin-mediated endocytosis                                                                                                     | Endosomal acidification exposes phospholipase domain that lyses endolysosomal membrane | Endosomal acidification exposes NLS domains that direct genes to nucleus                                                                                        | siRNA, DNA                | Tomar et al. 2003; Xu et al. 2005; Tomar et al. 2003; Xu et al. 2005                                                                                                     |
| <a href="#">HIV</a>                     | Enveloped, cone-shaped capsid<br>Size: 100 nm                                                                             | Sequential binding of spike protein GP120 to CD4 and a chemokine receptor promotes membrane fusion and direct cytosolic delivery. | N/A                                                                                    | Preinitiation complex is transported along the microtubule to the perinuclear region. NLS peptides on viral capsid promote karyopherin-mediated nuclear uptake. | DNA, siRNA, shRNA, miRNA  | Bukrinsky 2004; Hamid, Kim, and Shin 2015; Fanales-Belasio et al. 2010                                                                                                   |
| <a href="#">CCMV</a>                    | Non-enveloped, icosahedral capsid<br>Size: 30nm                                                                           | Direct cytosolic delivery                                                                                                         | N/A                                                                                    | N/A                                                                                                                                                             | siRNA, mRNA, dsDNA        | Lam and Steinmetz 2019; Pretto and van Hest 2019; Villagrana-Escareño et al. 2019; Mukherjee et al. 2006                                                                 |
| <a href="#">MS2</a>                     | Non-enveloped bacteriophage with complex structure and icosahedral head<br>Size: 27 nm                                    | Receptor-mediated endocytosis (when targeting ligands are added)                                                                  | Incorporation of penetrating or fusogenic peptides could facilitate endosomal escape.  | N/A                                                                                                                                                             | shRNA, mRNA, miRNA, siRNA | Fu and Li 2016; Galaway and Stockley 2013; Ashley et al. 2011; Prel et al. 2015; Yao et al. 2015; Pan, Jia, et al. 2012; Pan, Zhang, et al. 2012; Lam and Steinmetz 2018 |
| <a href="#">M13</a>                     | Non-enveloped filamentous bacteriophage composed of helically arranged coat proteins<br>Size: 880 nm length, 6.6 nm width | Receptor-mediated endocytosis (when targeting ligands are added)                                                                  | Disruption of caveosomes and/or caveosome trafficking (need further studies)           | N/A                                                                                                                                                             | Mammalian DNA transgene   | Kim et al. 2012; Tian et al. 2015; Karimi et al. 2016; Moon et al. 2015; Passaretti et al. 2020; Yata et al. 2014                                                        |

Formatted Table

Formatted: Not Highlight

## Virus Structure and Mechanism Inform the Design of Nucleic Acid Delivery Systems

|                                    |                                                                                                                                                                                                                     |                                                                                                          |                                                                                                                                                                                |                                                                                                                       |                                                              |                                                                                                                                                                                                                                                                                                                                      |
|------------------------------------|---------------------------------------------------------------------------------------------------------------------------------------------------------------------------------------------------------------------|----------------------------------------------------------------------------------------------------------|--------------------------------------------------------------------------------------------------------------------------------------------------------------------------------|-----------------------------------------------------------------------------------------------------------------------|--------------------------------------------------------------|--------------------------------------------------------------------------------------------------------------------------------------------------------------------------------------------------------------------------------------------------------------------------------------------------------------------------------------|
| <u>AAVAdV</u>                      | Nonenveloped, icosahedral capsid<br>Size: 20-25 nm<br>Nonenveloped, icosahedral-capsid with fiber knobs on vertices-encapsulates nucleic acids<br>Size: 60-90 nm<br>Shape: icosahedron                              | Clathrin-mediated endocytosis<br>Binding to CAR and integrins facilitates integrin-dependent endocytosis | Endosomal acidification exposes phospholipase domain that lyses endo-lysosomal membrane<br>Cera mide-enhanced insertion to and membrane disruption of early endosomes by VP VI | Endosomal acidification exposes NLS domains that direct genes to nucleus<br>Microtubule dynein/dynactin-motor complex | siRNA, DNA, transgene, therapeutic genes                     | Tomar et al. 2003; Xu et al. 2005; Greber et al. 1997; Tatsis and Ertl 2004; Volpers and Kochanek 2004; Russell 2009; Fay and Panté 2015; Staring et al. 2018; Greber et al. 1997; Tatsis and Ertl 2004; Volpers and Kochanek 2004; Russell 2009; Fay and Panté 2015; Staring et al. 2018                                            |
| <b>Virus-like Particles (VLPs)</b> |                                                                                                                                                                                                                     |                                                                                                          |                                                                                                                                                                                |                                                                                                                       |                                                              |                                                                                                                                                                                                                                                                                                                                      |
| <u>AdVMS2</u>                      | Nonenveloped, icosahedral capsid with fiber knobs on vertices<br>Size: 90-100 nm<br>180 identical CP self-assemble to encapsidate nucleic acid cargo<br>Diameter of head: 26 nm<br>Shape: Complex, icosahedral-head | Binding to CAR and integrins facilitates integrin-dependent endocytosis<br>Receptor-mediated endocytosis | Unknown<br>Cera mide-enhanced insertion to and membrane disruption of early endosomes by protein<br>Unknown                                                                    | Microtubule dynein/dynactin motor complex<br>N/A                                                                      | DNA, transgene, therapeutic genes, shRNA, mRNA, miRNA, siRNA | Greber et al. 1997; Tatsis and Ertl 2004; Volpers and Kochanek 2004; Russell 2009; Fay and Panté 2015; Staring et al. 2018; Fu and Li 2016; Galaway and Stockley 2013; Ashley et al. 2011; Prel et al. 2015; Yao et al. 2015; Y. Pan, Jia, et al. 2012; Y. Pan, Zhang, et al. 2012; Lam and Steinmetz 2018; Ashley et al. 2011; Pan, |

Formatted Table

Formatted: Font: 9 pt

## Virus Structure and Mechanism Inform the Design of Nucleic Acid Delivery Systems

|                       |                                                                                                                                                                                                                                                                                                                  |                                                                                                                                               |                                                                                                  |                                                                                                       |                                                         |                                                                                                                                                                                                                                                                                                                                                                                                                                                                                                                               |
|-----------------------|------------------------------------------------------------------------------------------------------------------------------------------------------------------------------------------------------------------------------------------------------------------------------------------------------------------|-----------------------------------------------------------------------------------------------------------------------------------------------|--------------------------------------------------------------------------------------------------|-------------------------------------------------------------------------------------------------------|---------------------------------------------------------|-------------------------------------------------------------------------------------------------------------------------------------------------------------------------------------------------------------------------------------------------------------------------------------------------------------------------------------------------------------------------------------------------------------------------------------------------------------------------------------------------------------------------------|
| <a href="#">JVCMV</a> | <p><a href="#">Enveloped, spherical capsid with helical symmetry</a><br/> <a href="#">Size: 80-120nm</a><br/> <a href="#">Shape: spherical</a><br/> <a href="#">480 identical CP self-assemble to encapsidate nucleic acid cargo</a><br/> <a href="#">Size: 28nm</a><br/> <a href="#">Shape: icosahedral</a></p> | <p><a href="#">Binding to sialic acid groups facilitates endocytosis. Direct cytosolic delivery</a></p>                                       | <p><a href="#">pH drop in endosomes reveals hydrophobic HA2 subunit that mediates fusion</a></p> | <p><a href="#">NLS sequences on nucleoprotein mediate karyopherin-dependent nuclear delivery</a></p>  | <p><a href="#">siRNA, miRNA, siRNA, mRNA, dsDNA</a></p> | <p><a href="#">Jia, et al. 2012; Pan, Zhang, et al. 2012; Galaway and Stockley 2013; Pret et al. 2015; Yao et al. 2015; Fu and Li 2016</a><br/> <a href="#">James and Whitley 2017; Couch 1996; Mammen et al. 1998; Pinto, Holsinger, and Lamb 1992; Neumann et al. 1997; Li et al. 2015; de Jonge et al. 2006; Li et al. 2013 (Yata et al. 2014); Mukherjee et al. 2006; Pretto and van Hest 2019; Villagrana-Escareño et al. 2019; Mukherjee et al. 2006; Pretto and van Hest 2019; Villagrana-Escareño et al. 2019</a></p> |
| <a href="#">HBV</a>   | <p><a href="#">Enveloped, icosahedral capsid</a><br/> <a href="#">Size: 42 nm</a></p>                                                                                                                                                                                                                            | <p><a href="#">Binding of major surface antigens of HBV to cellular receptors NTCP and HSPG facilitate receptor mediated endocytosis.</a></p> | <p><a href="#">Need further studies but shown to be insensitive to pH</a></p>                    | <p><a href="#">Microtubule assisted perinuclear delivery; karyopherin-dependent nuclear entry</a></p> | <p><a href="#">DNA</a></p>                              | <p><a href="#">Li 2015; Venkatakrishnan and Zlotnick 2016; Tsukuda and Watashi 2020; Brandenburg et al. 2005 (Lam and Steinmetz 2019; Pretto and van Hest 2019; Villagrana-Escareño et al. 2019; Mukherjee et al. 2006)</a></p>                                                                                                                                                                                                                                                                                               |

Formatted: Not Highlight

## Virus Structure and Mechanism Inform the Design of Nucleic Acid Delivery Systems

|                                                                                                                                                                                                                                                                                                                                                                                                                                          |                                                                                            |                                                                                          |                                                                                                             |                                                                                                                           |       |                                                                                                                                                                                                               |
|------------------------------------------------------------------------------------------------------------------------------------------------------------------------------------------------------------------------------------------------------------------------------------------------------------------------------------------------------------------------------------------------------------------------------------------|--------------------------------------------------------------------------------------------|------------------------------------------------------------------------------------------|-------------------------------------------------------------------------------------------------------------|---------------------------------------------------------------------------------------------------------------------------|-------|---------------------------------------------------------------------------------------------------------------------------------------------------------------------------------------------------------------|
| (W. Li 2015; Venkatakrishnan and Zlotnick 2016; Tsukuda and Watashi 2020; Brandenburg et al. 2005)(Brandenburg et al. 2005)(Bukrinsky 2004; Hamid, Kim, and Shin 2015; Fanales-Belasio et al. 2010)(James and Whitley 2017; Couch 1996; Mammen, Choi, and Whitesides 1998; Pinto, Holsinger, and Lamb 1992; Neumann, Castrucci, and Kawaoka 1997; Jing Li et al. 2015; de Jonge et al. 2006; Junwei Li, Arévalo, and Zeng 2013;EBOV SV40 | Enveloped, filamentous virus with helical symmetry<br>Diameter: 80 nm, length: 600-1400 nm | Macropinocytosis                                                                         | Binding to NPC1 in late endosomes or lysosomes facilitates fusion and endosomal escape                      | N/A                                                                                                                       | none  | Beniac et al. 2012; Falasca et al. 2015; Hunt, Lennemann, and Maury 2012; Kondratowicz et al. 2011; Nanbo et al. 2010; Aleksandrowicz et al. 2011; Carette et al. 2011; Côté et al. 2011; H. Wang et al. 2016 |
| SV40                                                                                                                                                                                                                                                                                                                                                                                                                                     | Non-enveloped, spherical capsid with icosahedral symmetry<br>Size: 45 nm                   | SV40 VP1 protein binds to MHC-1 receptor and undergoes caveolin mediated internalization | Caveosomes undergo dynamic shape changes, and the virus is transported to the smooth endoplasmic reticulum. | Capsid disassembly occurs in smooth ER; exposed NLS peptide facilitates nuclear uptake via karyopherin - mediated pathway | none  | Fay and Panté 2015, Norkin et al. 1998, Pelkmans et al. 2001, Nakanishi et al. 2007                                                                                                                           |
| (Beniac et al. 2012; Falasca et al. 2015; Hunt, Lennemann, and Maury 2012; Kondratowicz et al. 2011; Nanbo et al. 2010; Aleksandrowicz et al. 2011; Carette et al. 2011; Côté et al. 2011; Han Wang et al. 2016)Carbohydrate-based vector                                                                                                                                                                                                |                                                                                            |                                                                                          |                                                                                                             |                                                                                                                           |       |                                                                                                                                                                                                               |
| siRNA-GalNAc3 conjugates                                                                                                                                                                                                                                                                                                                                                                                                                 | Tris-GalNAc ligand of ASPGR is covalently attached to siRNA                                | Receptor-mediated endocytosis                                                            | Unknown                                                                                                     | N/A                                                                                                                       | siRNA | Nair et al. 2014; Springer and Dowdy 2018Nair-et al. 2014; Springer and Dowdy 2018                                                                                                                            |
| <b>Protein/Peptide-based vectors</b>                                                                                                                                                                                                                                                                                                                                                                                                     |                                                                                            |                                                                                          |                                                                                                             |                                                                                                                           |       |                                                                                                                                                                                                               |

Formatted: Not Highlight

Formatted Table

## Virus Structure and Mechanism Inform the Design of Nucleic Acid Delivery Systems

|                                                                |                                                                                                                                                                                                                    |                                                                                                                                        |                                                                                                                                                                                                      |                                                                                                                                                                                     |                         |                                                                                                                                                                       |
|----------------------------------------------------------------|--------------------------------------------------------------------------------------------------------------------------------------------------------------------------------------------------------------------|----------------------------------------------------------------------------------------------------------------------------------------|------------------------------------------------------------------------------------------------------------------------------------------------------------------------------------------------------|-------------------------------------------------------------------------------------------------------------------------------------------------------------------------------------|-------------------------|-----------------------------------------------------------------------------------------------------------------------------------------------------------------------|
| <b>ARCs</b>                                                    | Antibody is conjugated to alkyne-siRNA sense strand via a bifunctional azidoLys peptide linker                                                                                                                     | Receptor-mediated endocytosis                                                                                                          | N/A                                                                                                                                                                                                  | N/A                                                                                                                                                                                 | siRNA                   | <a href="#">Huggins et al. 2019</a> <a href="#">Huggins et al. 2019</a>                                                                                               |
| <b>REDV-G<sub>m</sub>-TAT-G<sub>m</sub>-NLS tandem peptide</b> | Peptide sequences covalently linked with Gly repeats pack pDNA via electrostatic condensation<br>Size: 200 nm<br>Shape: Spherical                                                                                  | REDV selectively binds to integrin $\alpha 4\beta 1$ of endothelial cells, leading to endocytosis. TAT promotes membrane permeability. | NLS have buffering capacity                                                                                                                                                                          | NLS facilitates <a href="#">karyopherin<math>\beta</math> portin <math>\alpha/\beta</math></a> mediated perinuclear delivery                                                        | pDNA                    | <a href="#">Hao et al. 2017</a> <a href="#">Hao et al. 2017</a>                                                                                                       |
| <b>T-Rp3</b>                                                   | Modular His <sub>6</sub> -tagged protein composed of the recombinant DBP, a DBD, and TAT<br>Size: 100 nm<br>Shape: free from - toroidal; bound form - spherical                                                    | TAT facilitates endocytosis mostly via clathrin-dependent pathway                                                                      | His <sub>6</sub> tag induces "Proton-sponge effect"                                                                                                                                                  | T-Rp3 interacts with microtubule and is transported to the perinuclear region<br>Nuclear entry is due to hydrophobic interaction of positively charged amino acid residues with NPC | pDNA, siRNA, dsRNA      | <a href="#">Favaro et al. 2014</a> ; <a href="#">Favaro et al. 2018</a> <a href="#">Favaro et al. 2014</a> ; <a href="#">Favaro et al. 2018</a>                       |
| <b>Polymer-based vectors</b>                                   |                                                                                                                                                                                                                    |                                                                                                                                        |                                                                                                                                                                                                      |                                                                                                                                                                                     |                         |                                                                                                                                                                       |
| <b>A-C3</b>                                                    | Cationic diblock copolymer pDMAEA-PImpAA-pBA condenses nucleic acids<br>Size: 200 nm<br>Shape: Spherical                                                                                                           | Cationic pDMAEA facilitates clathrin-mediated endocytosis                                                                              | Ionizable PImpAA elicits proton sponge effect; Hydrophobic PBA inserts into endosomal membrane                                                                                                       | BA binds to NPC via hydrophobic interaction                                                                                                                                         | pDNA, siRNA             | <a href="#">Gillard et al. 2014</a> , <a href="#">Truong et al. 2013</a>                                                                                              |
| <b>PAT-SPN</b>                                                 | Cationic diblock copolymer DMAEA-PAA-BA condenses nucleic acids; PEG shell is tethered to polyplex core through an MMP-7 peptide substrate<br>Size: 46 nm<br>Shape: Spherical                                      | MMP-7 activated particle enter via endocytosis                                                                                         | pH-dependent membrane destabilization by endosomolytic PAA-BAA block                                                                                                                                 | Not shown                                                                                                                                                                           | DNA, siRNA              | <a href="#">Li et al. 2013</a> <a href="#">Li et al. 2013</a>                                                                                                         |
| <b>Lipid-based vectors</b>                                     |                                                                                                                                                                                                                    |                                                                                                                                        |                                                                                                                                                                                                      |                                                                                                                                                                                     |                         |                                                                                                                                                                       |
| <b>Liposomes</b>                                               | Lipid combinations containing ionizable cationic lipids, <a href="#">fusogenic fusigenic</a> lipids, cholesterol, and PEG-lipids form spherical bilayers with an aqueous core<br>Size: <200 nm<br>Shape: Spherical | Direct fusion or endocytosis                                                                                                           | <a href="#">Membrane fusion – can be made responsive to Low pH ionizes cationic lipids that then interact with anionic endosomal membrane, forming non-bilayer structures</a> <a href="#">cellul</a> | N/A                                                                                                                                                                                 | mRNA, siRNA, pDNA, ASOs | <a href="#">(Semple et al. 2010; Akinc et al. 2010; Corbett et al. 2020; Callaway 2020; Jeffs et al. 2005; Wheeler et al. 1999; Lechardeur et al. 1999; Heidarli,</a> |

Formatted: Font:

## Virus Structure and Mechanism Inform the Design of Nucleic Acid Delivery Systems

|                                        |                                                                                                                                               |                                                                                     |                                                                                                                                                                                              |     |                   |                                                                                                                                                                                                                                         |
|----------------------------------------|-----------------------------------------------------------------------------------------------------------------------------------------------|-------------------------------------------------------------------------------------|----------------------------------------------------------------------------------------------------------------------------------------------------------------------------------------------|-----|-------------------|-----------------------------------------------------------------------------------------------------------------------------------------------------------------------------------------------------------------------------------------|
|                                        |                                                                                                                                               |                                                                                     | <a href="#">ar (pH, enzymes, redox potential) or external (temperature, magnetic field, light) stimuli; may also be decorated with penetrating or fusogenic domains to facilitate escape</a> |     |                   | <a href="#">Dadashzadeh and Haeri 2017; Leehardeur et al. 1999; Wheeler et al. 1999; Jeffs et al. 2005; Akinc et al. 2010; Semple et al. 2010; Callaway 2020; Corbett et al. 2020</a>                                                   |
| <b>SLNPs</b>                           | Nucleic acids combined with cationic lipids form neutral complexes that are encapsulated by solid lipids<br>Size: ~150 nm<br>Shape: spherical | Phagocytosis or endocytosis (depends on cell type and surface modification)         | Membrane destabilization                                                                                                                                                                     | N/A | siRNA             | <a href="#">Lobovkina et al. 2011; Arana et al. 2019; Lobovkina et al. 2011; Arana et al. 2019</a>                                                                                                                                      |
| <b>Inorganic Nanoparticles</b>         |                                                                                                                                               |                                                                                     |                                                                                                                                                                                              |     |                   |                                                                                                                                                                                                                                         |
| <b>AuNPs</b>                           | Covalent attachment of nucleic acid cargo or supramolecular assembly<br>Size: ~50 nm<br>Shape: spherical, rod-like, star-like, triangular     | Clathrin-mediated endocytosis                                                       | Polycationic functionalities on the surface disturb the pH balance leading to osmotic swelling and endosomal rupture - "proton sponge" mechanism                                             | N/A | DNA, siRNA, miRNA | <a href="#">Burger et al. 2014; Ding et al. 2014; Neshatian et al. 2014; Mendes et al. 2017; Xie et al. 2017; Burger et al. 2014; Ding et al. 2014; Neshatian et al. 2014; Mendes et al. 2017; Xie et al. 2017</a>                      |
| <b>Fe<sub>3</sub>O<sub>4</sub> NPs</b> | Covalent attachment of nucleic acid cargo or supramolecular assembly<br>Size: 50-100 nm<br>Shape: spherical                                   | Endocytosis that could be enhanced by the application of oscillating magnetic field | osmotic swelling if polycationic polymers are used, membrane destabilization if coated with lipids or functionalized with cell penetrating peptides                                          | N/A | DNA, siRNA        | <a href="#">McBain et al. 2008; Cutler et al. 2010; Jiang et al. 2013; Urie and Rege 2015; Dowaidar et al. 2017; Cruz-Acuña et al. 2018; McBain et al. 2008; Cutler et al. 2010; Jiang et al. 2013; Urie and Rege 2015; Dowaidar et</a> |



## Virus Structure and Mechanism Inform the Design of Nucleic Acid Delivery Systems

|                                                       |                                                                                                                                                                                    |                                      |                                                             |                                                                                                        |                                                                    |                                                                                                                                                                                                                                                                                                                                                                                                                                                                                                                                                    |
|-------------------------------------------------------|------------------------------------------------------------------------------------------------------------------------------------------------------------------------------------|--------------------------------------|-------------------------------------------------------------|--------------------------------------------------------------------------------------------------------|--------------------------------------------------------------------|----------------------------------------------------------------------------------------------------------------------------------------------------------------------------------------------------------------------------------------------------------------------------------------------------------------------------------------------------------------------------------------------------------------------------------------------------------------------------------------------------------------------------------------------------|
| <b>NanoMOFs</b>                                       | biomineralization, pore encapsulation, supramolecular assembly<br>Size: 30-300 nm<br>Shape: spherical, ellipsoidal, cubic, hexagonal, octahedral                                   | Endocytosis                          | osmotic swelling induced by metal cations from degraded MOF | N/A                                                                                                    | DNA, aptamers (DNA and RNA), miRNA, siRNA, pDNA                    | <a href="#">al., 2017;</a><br><a href="#">Cruz-Acueña et al., 2018;</a><br><a href="#">Liang et al., 2015;</a><br><a href="#">Peng et al., 2018;</a><br><a href="#">Sun et al., 2018;</a><br><a href="#">Li et al., 2019;</a><br><a href="#">Teplensky et al., 2019;</a><br><a href="#">Sun et al., 2020;</a><br><a href="#">Liang et al., 2015;</a><br><a href="#">Peng et al., 2018;</a><br><a href="#">Sun et al., 2018;</a><br><a href="#">Li et al., 2019;</a><br><a href="#">Teplensky et al., 2019;</a><br><a href="#">Sun et al., 2020</a> |
| <b>NPSCs</b>                                          | Complexes of nucleic acid and Arg-rich inorganic nanoparticles are assembled on an oil drop<br>Size: 150-500 nm<br>Shape: spherical                                                | Direct fusion and cytosolic delivery | N/A                                                         | No data yet                                                                                            | siRNA, CRISPR-Cas9-gRNA                                            | <a href="#">Jiang et al., 2015;</a><br><a href="#">Mout et al., 2017;</a><br><a href="#">Jiang et al., 2018;</a><br><a href="#">Jiang et al., 2015;</a><br><a href="#">Mout et al., 2017;</a><br><a href="#">Jiang et al., 2018</a>                                                                                                                                                                                                                                                                                                                |
| <b>usAuNP</b>                                         | Tiopronin-covered AuNPs conjugated to TFO<br>Size: 2-20 nm<br>Shape: spherical                                                                                                     | Caveolae-mediated endocytosis        | Passive diffusion out of the endosome                       | 2 and 6 nm gene carrying NP undergo passive diffusion whereas any size above 10 nm stays in cytoplasm. | c-myc promoter-binding TFO                                         | <a href="#">Cai et al., 2011;</a><br><a href="#">Huang et al., 2012;</a><br><a href="#">Huo et al., 2014;</a><br><a href="#">Cai et al., 2011;</a><br><a href="#">Huang et al., 2012;</a><br><a href="#">Huo et al., 2014</a>                                                                                                                                                                                                                                                                                                                      |
| <b>Nucleic Acid Displaying Nanostructures (NADNs)</b> |                                                                                                                                                                                    |                                      |                                                             |                                                                                                        |                                                                    |                                                                                                                                                                                                                                                                                                                                                                                                                                                                                                                                                    |
| <b>SNAs</b>                                           | Outward display of densely packed nucleic acids physically adsorbed or covalently bonded to a nanoparticle core<br>Size: <1200 nm<br>-Shape: spherical, rod-like, triangular prism | Caveolae-mediated endocytosis        | N/A, most trapped in endosomes                              | N/A                                                                                                    | siRNA, miRNA, DNazymes, aptamers, ribozymes, immunostimulatory DNA | <a href="#">Mirkin et al., 1996;</a><br><a href="#">Elghanian et al., 1997;</a><br><a href="#">Jin et al., 2003;</a><br><a href="#">Ni et al., 2006;</a><br><a href="#">Massich et al., 2009;</a><br><a href="#">Seferos et al., 2009;</a><br><a href="#">Cutler et al., 2011;</a><br><a href="#">Cutler et al., 2012;</a><br><a href="#">Young et al., 2012;</a><br><a href="#">Choi et al., 2013;</a><br><a href="#">Banga et al., 2017;</a><br><a href="#">Li et al., 2018;</a><br><a href="#">Rouge et al.,</a>                                |

## Virus Structure and Mechanism Inform the Design of Nucleic Acid Delivery Systems

|                             |                                                                                                                                                                                                                                                     |             |                                                                                                                                                                 |      |                           |                                                                                                                                                                                                                                                                                                                                                                                                               |
|-----------------------------|-----------------------------------------------------------------------------------------------------------------------------------------------------------------------------------------------------------------------------------------------------|-------------|-----------------------------------------------------------------------------------------------------------------------------------------------------------------|------|---------------------------|---------------------------------------------------------------------------------------------------------------------------------------------------------------------------------------------------------------------------------------------------------------------------------------------------------------------------------------------------------------------------------------------------------------|
|                             |                                                                                                                                                                                                                                                     |             |                                                                                                                                                                 |      |                           | 2015Mirkin et al. 1996; Elghanian et al. 1997; Jin et al. 2003; Ni et al. 2006; Massieh et al. 2009; Seferos et al. 2009; Cutler et al. 2011; Cutler et al. 2012; Young et al. 2012; Choi et al. 2013; Banga et al. 2017; Li et al. 2018                                                                                                                                                                      |
| <b>NANs</b>                 | Nucleic acids are radially displayed on and photochemically tethered to the surface of crosslinked micelles. Hollow core permits co-delivery of small molecules and large biomolecules<br>Size: 20-180nm<br>Shape: Spherical                        | Endocytosis | Micelle cross-linkages are enzymatically cleaved by endosomal esterases or proteases, revealing a hydrophobic surfactant tail that facilitates cytosolic access | N/A  | DNA, siRNA, DNazyme, pDNA | <a href="#">Awino et al. 2017</a> ; <a href="#">Santiana et al. 2017</a> ; <a href="#">Hartmann et al. 2018</a> ; <a href="#">Hartmann et al. 2020</a> ; <a href="#">Tolentino et al.</a> <a href="#">2020</a> <a href="#">Awino et al. 2017</a> ; <a href="#">Santiana et al. 2017</a> ; <a href="#">Hartmann et al. 2018</a> ; <a href="#">Hartmann et al. 2020</a> ; <a href="#">Tolentino et al. 2020</a> |
| <b>Nucleic Acid Nanogel</b> | Double stranded nucleic acid linkers with single stranded overhangs hybridize with multiple DNA strands clicked onto a polymeric backbone, serving as crosslinks that condense the construct into a nanogel<br>Size: 80-1200 nm<br>Shape: spherical | Endocytosis | Unknown                                                                                                                                                         | None | siRNA, Cas9/sgRNA         | <a href="#">Ding et al. 2018</a> ; <a href="#">Ding et al. 2019</a> ; <a href="#">Ding et al. 2020</a> <a href="#">Ding et al. 2018</a> ; <a href="#">Ding et al. 2019</a> ; <a href="#">Ding et al. 2020</a>                                                                                                                                                                                                 |

3756 **Abbreviations:** AAV, adeno-associated virus; siRNA, small interfering RNA; AdV, adenovirus; shRNA, small hairpin RNA; VLP,  
3757 virus-like particle; [NTPC, sodium taurocholate cotransporting polypeptide](#); [HSPG, heparan sulfate glycoprotein](#); CCMV, cowpea  
3758 chlorotic mottle virus; mRNA, messenger RNA; miRNA, microRNA; GalNAc, N-acetylgalactosamine; ASPGR, asialoglycoprotein  
3759 receptor; ARC, antibody-RNA conjugate; REDV, Arg-Glu-Asp-Val; G<sub>m</sub>, Gly repeats; TAT, transactivator of transcription peptide; NLS,  
3760 nuclear localization sequence; pDNA, plasmid DNA; DBD, DNA-binding domain; DBP, dynein-binding protein; pDMAEA,  
3761 dimethylaminoethyl methacrylate; PImPAA, P(N-(3-(1H-imidazol-1-yl)propyl)acrylamide); pBA, poly(butyl acrylate); PAT-SPN,  
3762 proximity-activated targeting smart polymeric nanoparticle; PEG, polyethylene glycol; MMP-7, matrix metalloproteinase-7; SLNP, solid

## Virus Structure and Mechanism Inform the Design of Nucleic Acid Delivery Systems

3763 lipid nanoparticle; AuNP, gold nanoparticles; Fe<sub>3</sub>O<sub>4</sub> NP, iron oxide nanoparticle; NanoMOF, nano metal-organic framework; NPSC,  
3764 nanoparticle stabilized nanocapsules; CRISPR-Cas9-gRNA, clustered regularly spaced palindromic sequences (CRISPR) CRISPR-  
3765 associated (Cas9) guide RNA; usAuNP, ultrasmall gold nanoparticle; TFO, triplex forming oligonucleotides; SNA, spherical nucleic  
3766 acids; NAN, nucleic acid nanocapsules  
3767

Virus Structure and Mechanism Inform the Design of Nucleic Acid Delivery Systems

3768

3769

Formatted: Normal, Justified, Line spacing: 1.5 lines

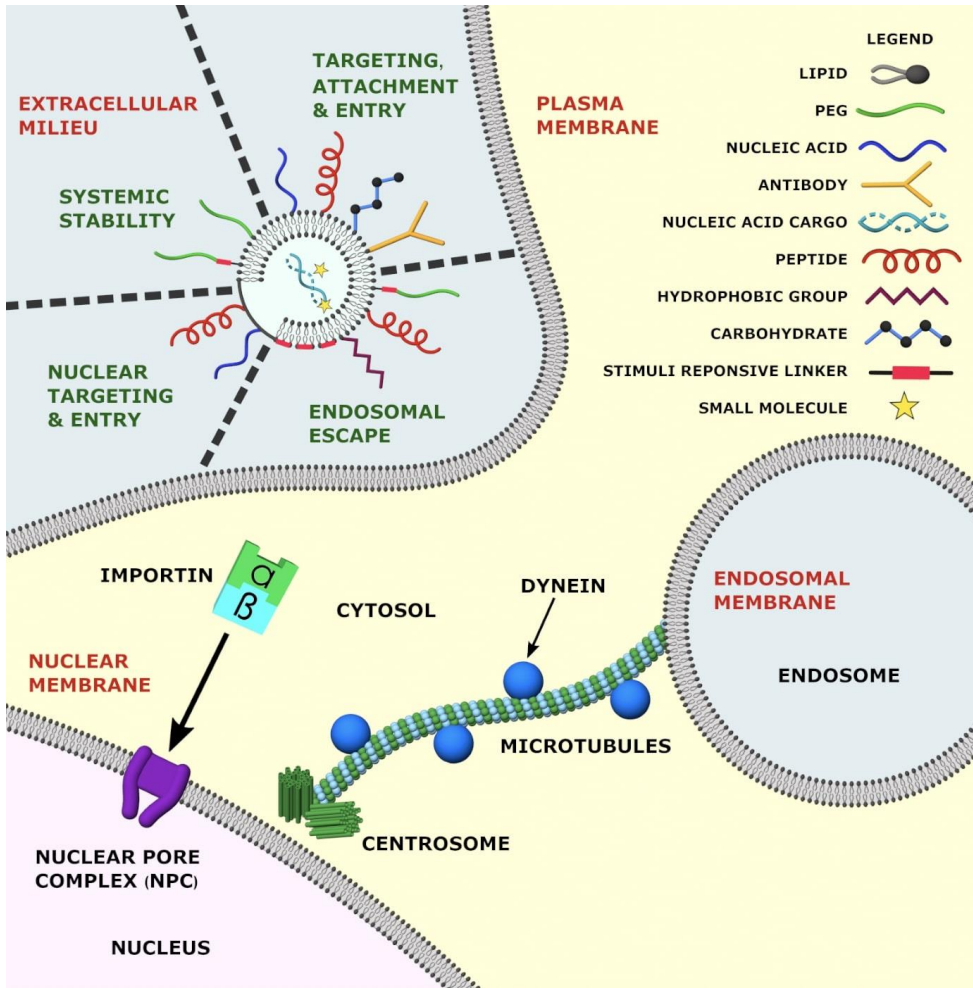

3770

3771

3772

Figure 2. Key domains such as aptamers, peptides, carbohydrates, small molecules, and antibodies govern the extracellular and intracellular fate of nucleic acid carriers.

3773

3774

3775

3776

## Virus Structure and Mechanism Inform the Design of Nucleic Acid Delivery Systems

3777

3778

3779

**Table 2. Key components added to modulate trafficking**

Formatted: Font:

| Components                              | Examples                                           | Mechanism of Action                                                                                                                 | Nucleic Acid Carriers                                                     | Ref                                                                                                                                                                                                                               |
|-----------------------------------------|----------------------------------------------------|-------------------------------------------------------------------------------------------------------------------------------------|---------------------------------------------------------------------------|-----------------------------------------------------------------------------------------------------------------------------------------------------------------------------------------------------------------------------------|
| <i>Targeting, Attachment, and Entry</i> |                                                    |                                                                                                                                     |                                                                           |                                                                                                                                                                                                                                   |
| <b>Aptamers</b>                         | Electrostatically adsorbed RNA-based CD30 aptamer  | Binding to surface CD30 specifically overexpressed in ALK <sup>+</sup> ACLC promotes endocytosis                                    | siRNA-loaded cationic polymer-based vector                                | <a href="#">Zhao et al. 2011</a> <a href="#">Zhao et al. 2011</a>                                                                                                                                                                 |
|                                         | Surface-anchored RNA-based transferrin aptamer     | Binding to cell surface transferrin receptor mediates endocytosis                                                                   | siRNA-loaded liposomes                                                    | <a href="#">Wilner et al. 2012</a> <a href="#">Wilner et al. 2012</a>                                                                                                                                                             |
| <b>Peptides</b>                         | Integrin-targeting peptides (e.g. RGD, REDV, AG86) | Binding to integrins facilitates clathrin- or receptor- mediated endocytosis                                                        | siRNA-peptide conjugates, pDNA-peptide complexes                          | <a href="#">Hao et al. 2017</a> ; <a href="#">Kang et al. 2019</a> <a href="#">Hao et al. 2017</a> ; <a href="#">Kang et al. 2019</a>                                                                                             |
|                                         | GLP1                                               | Binding to GLP1R on pancreatic islet beta cells facilitates endocytosis                                                             | ASO-GLP1 peptide conjugates                                               | <a href="#">Ämmälä et al. 2018</a> <a href="#">Ämmälä et al. 2018</a>                                                                                                                                                             |
|                                         | TAT                                                | Cationic naked or conjugated peptide can enter cells via macropinocytosis or receptor-mediated endocytosis <del>(CNS)</del>         | siRNA-TAT-EED conjugates                                                  | <a href="#">Lönn et al. 2016</a> ; <a href="#">Khan et al. 2020</a> <a href="#">Lönn et al. 2016</a> ; <a href="#">Khan et al. 2020</a>                                                                                           |
|                                         | R8                                                 | Acid-labile hydrazone linkages are cleaved around tumor cells, revealing cationic CPP that mediates endocytosis                     | siRNA-loaded, ACP- decorated liposomes                                    | <a href="#">Xiang et al. 2017</a> <a href="#">Xiang et al. 2017</a>                                                                                                                                                               |
|                                         | MPG                                                | Hydrophobic domain of peptide facilitates direct cytosolic entry                                                                    | Noncovalent MPG complexes peptide-siRNA and peptide-pDNA complexes        | <a href="#">Simeoni 2003</a> <a href="#">Simeoni 2003</a>                                                                                                                                                                         |
| <b>Carbohydrates</b>                    | GalNAc                                             | Multivalent binding to hepatocyte ASGPR mediates endocytosis                                                                        | siRNA-GalNAc conjugates                                                   | <a href="#">Nair et al. 2014</a> <a href="#">Nair et al. 2014</a>                                                                                                                                                                 |
| <b>Small Molecules</b>                  | Folate                                             | Binding to folate-receptors overexpressed in cancer cells mediates endocytosis                                                      | pDNA loaded liposomes functionalized with folic acid as targeting ligand. | <a href="#">Sikorski et al. 2015</a> Feb; <a href="#">Cui et al. 2016</a> ; <a href="#">Orellana et al. 2017</a> <a href="#">Sikorski et al. 2015</a> Feb; <a href="#">Cui et al. 2016</a> ; <a href="#">Orellana et al. 2017</a> |
|                                         | Bivalent β-turn analogues                          | Mimic β-turn recognition motifs that facilitate protein-protein interactions; hydrophobic tail added to enhance membrane attachment | pDNA-loaded BIVs                                                          | <a href="#">Burgess 2001</a> ; <a href="#">Shi et al. 2010</a> <a href="#">Burgess 2001</a> ; <a href="#">Shi et al. 2010</a>                                                                                                     |
|                                         | Nigericin                                          | Ion exchange between endosomal H <sup>+</sup> and cytosolic K <sup>+</sup> results in endosomal swelling and rupture                | miRNA-folate-nigericin conjugates                                         | <a href="#">Orellana et al. 2019</a> <a href="#">Orellana et al. 2019</a>                                                                                                                                                         |

## Virus Structure and Mechanism Inform the Design of Nucleic Acid Delivery Systems

|                         |                                                                                          |                                                                                                                           |                                                                                                                                                                                    |                                                                                                                                                                                                                                                                                           |
|-------------------------|------------------------------------------------------------------------------------------|---------------------------------------------------------------------------------------------------------------------------|------------------------------------------------------------------------------------------------------------------------------------------------------------------------------------|-------------------------------------------------------------------------------------------------------------------------------------------------------------------------------------------------------------------------------------------------------------------------------------------|
| <b>Antibodies</b>       | Surface-anchored Anti-CD3 and Anti-CD8 antibodies                                        | Binding to surface CD3 and CD8 receptors on T-cells promotes endocytosis                                                  | mRNA-loaded polymer-based carrier                                                                                                                                                  | <a href="#">Moffett et al. 2017</a> <a href="#">Moffett et al. 2017</a>                                                                                                                                                                                                                   |
|                         | Anti-CD22 mAb-SA                                                                         | Binding to CD22 receptor in lymphoma cells promotes receptor-mediated endocytosis                                         | siRNA-loaded polymer-based system                                                                                                                                                  | <a href="#">Palanca-Wessels et al. 2011</a> <a href="#">Palanca-Wessels et al. 2011</a>                                                                                                                                                                                                   |
|                         | Surface-conjugated Anti-HER2 mAb                                                         | Binding to HER2 overexpressed in breast cancer cells facilitates endocytosis                                              | siRNA-loaded inorganic- and polymer-based system                                                                                                                                   | <a href="#">Ngamcherdtrakul et al. 2015</a> <a href="#">Ngameherdtrakul et al. 2015</a>                                                                                                                                                                                                   |
|                         | Anti-CD33 IgG4 mAb                                                                       | Binding to CD33 <sup>+</sup> AML THP1 cells facilitates endocytosis                                                       | <a href="#">Antibody-siRNA Conjugates (ARCs)</a> <a href="#">RCs</a>                                                                                                               | <a href="#">Huggins et al. 2019</a> <a href="#">Huggins et al. 2019</a>                                                                                                                                                                                                                   |
| <b>Endosomal Escape</b> |                                                                                          |                                                                                                                           |                                                                                                                                                                                    |                                                                                                                                                                                                                                                                                           |
| <b>Peptides</b>         | Fusogenic peptides (e.g. HA2-derived peptides, GALA, KALA)                               | Glu- or His-rich peptides undergo acid-driven conformational change to alpha-helical structure, leading to pore formation | pDNA entrapped in gelatin-silica nanoparticles modified with fusogenic peptides, or nanobiomimetic carrier composed of targeting and fusogenic peptides by which DNA is condensed. | <a href="#">Ye et al. 2012</a> ; <a href="#">Kusumoto et al. 2014</a> ; <a href="#">Alipour et al. 2017</a> ; <a href="#">Ni et al. 2019</a> <a href="#">Ye et al. 2012</a> ; <a href="#">Kusumoto et al. 2014</a> ; <a href="#">Alipour et al. 2017</a> ; <a href="#">Ni et al. 2019</a> |
|                         | Addition of 5-20 His to the targeting ligand                                             | Proton sponge effect                                                                                                      | pDNA-His modified peptide complexes                                                                                                                                                | <a href="#">Lo and Wang 2008</a> ; <a href="#">Chang et al. 2010</a> <a href="#">Lo and Wang 2008</a> ; <a href="#">Chang et al. 2010</a>                                                                                                                                                 |
|                         | Endosomal Escape Domains (EEDs)                                                          | Hydrophobic W- and F-containing peptides destabilize endo-lysosomal membranes                                             | siRNA-TAT-EED conjugates                                                                                                                                                           | <a href="#">Lönn et al. 2016</a> <a href="#">Lönn et al. 2016</a>                                                                                                                                                                                                                         |
| <b>Small molecules</b>  | <a href="#">OECs</a> <a href="#">Oligonucleotide Enhancing Compounds (OECs)</a>          | Enhance membrane permeability                                                                                             | ASO/SSO/siRNA-OEC conjugates                                                                                                                                                       | <a href="#">Yang et al. 2015</a> ; <a href="#">Wang et al. 2017</a> ; <a href="#">Juliano et al. 2018</a> ; <a href="#">Seth et al. 2019</a> <a href="#">Yang et al. 2015</a> ; <a href="#">Wang et al. 2017</a> ; <a href="#">Juliano et al. 2018</a> ; <a href="#">Seth et al. 2019</a> |
|                         | <a href="#">CADs</a> <a href="#">Cationic Amphiphilic Drugs (CADs, e.g. chloroquine)</a> | Weak bases that destabilize the endo-lysosomal membrane                                                                   | Adjuvants for GalNAc-cholesterol-siRNA conjugates                                                                                                                                  | <a href="#">Du Rietz et al. 2020</a> <a href="#">Du Rietz et al. 2020</a>                                                                                                                                                                                                                 |
| <b>Polymer</b>          | PEI                                                                                      | Osmotic endosomal rupture                                                                                                 | siRNA-loaded cationic polymer                                                                                                                                                      | <a href="#">Zhao et al. 2011</a> <a href="#">Zhao et al. 2011</a>                                                                                                                                                                                                                         |
|                         | Multiblock (co)polymers (e.g. DMAEA-PAA-PBA, pDMAEA-PImPAA-PBA)                          | Endosomal rupture via ionic and hydrophobic interactions with membrane                                                    | DNA/RNA-polymer complexes                                                                                                                                                          | <a href="#">Li et al. 2013</a> ; <a href="#">Truong et al. 2013</a> ; <a href="#">Gillard et al. 2014</a> <a href="#">Li et al. 2013</a> ; <a href="#">Truong et al. 2013</a> ; <a href="#">Gillard et al. 2014</a>                                                                       |



## Virus Structure and Mechanism Inform the Design of Nucleic Acid Delivery Systems

|                                    |                                                                      |                                                                                                                                               |                                                                                                                   |                                                                                                                                                                                                                                                                                                              |
|------------------------------------|----------------------------------------------------------------------|-----------------------------------------------------------------------------------------------------------------------------------------------|-------------------------------------------------------------------------------------------------------------------|--------------------------------------------------------------------------------------------------------------------------------------------------------------------------------------------------------------------------------------------------------------------------------------------------------------|
| <b>Hydrophobic domains</b>         | Surfactant                                                           | Surfactant destabilizes endosomal membrane                                                                                                    | Polymeric micelle, siRNA-DNA conjugates, DNAzyme-NANs                                                             | <a href="#">Truong et al. 2013</a> ; <a href="#">Gillard et al. 2014</a> ; <a href="#">Zhang et al. 2015</a> ; <a href="#">Hartmann et al. 2018</a> ; <a href="#">Hartmann et al. 2020</a> ; <a href="#">Zhang et al. 2015</a> ; <a href="#">Hartmann et al. 2018</a> ; <a href="#">Hartmann et al. 2020</a> |
|                                    | Cationic or ionizable lipids (e.g. DOPE)                             | Lipid fusion destabilizes membrane                                                                                                            | siRNA-loaded liposomes                                                                                            | <a href="#">Semple et al. 2010</a> ; <a href="#">Wilner et al. 2012</a> ; <a href="#">Semple et al. 2010</a> ; <a href="#">Wilner et al. 2012</a>                                                                                                                                                            |
| <b>Nuclear Targeting and Entry</b> |                                                                      |                                                                                                                                               |                                                                                                                   |                                                                                                                                                                                                                                                                                                              |
| <b>Aptamers</b>                    | DTS (from SV40 enhancer region)                                      | DTS binds to cytoplasmic NLS-tagged proteins bound for nuclear delivery                                                                       | DTS sequence-containing plasmids                                                                                  | <a href="#">Miller and Dean 2009</a> ; <a href="#">Miller and Dean 2009</a>                                                                                                                                                                                                                                  |
|                                    | NFκB-motif embedded on plasmid sequence                              | NFκB binds with motif on pDNA and shuttles construct to nucleus                                                                               | pDNA/polymer complexes                                                                                            | <a href="#">Breuzard et al. 2008</a> ; <a href="#">Breuzard et al. 2008</a>                                                                                                                                                                                                                                  |
|                                    | Surface-displayed DNA-based nucleolin aptamer (AS411)                | Active transport and binding to nucleolin localized in nuclear membrane                                                                       | Polymeric micelle                                                                                                 | <a href="#">Zhang et al. 2015</a> ; <a href="#">Zhang et al. 2015</a>                                                                                                                                                                                                                                        |
| <b>Peptides</b>                    | <a href="#">DBP</a> <a href="#">Dynein Binding Protein (DBP)</a>     | DBP binds to motor and is carried to centrosome through microtubules                                                                          | Recombinant DBP-containing protein condensed with pDNA, siRNA and dsRNA                                           | <a href="#">Favaro et al. 2018</a> ; <a href="#">Favaro et al. 2014</a> ; <a href="#">Dalmau-Mena et al. 2018</a> ; <a href="#">Favaro et al. 2014</a> ; <a href="#">Dalmau-Mena et al. 2018</a>                                                                                                             |
|                                    | <a href="#">Nuclear Localization Signal (NLS)</a> <a href="#">LS</a> | Form weak, multiple interactions with cytoplasmic <del>importins</del> <a href="#">karyopherin</a> bound for active nuclear transport via NPC | pDNA condensed with cationic NLS; AuNP conjugated complex of CRISPR/Cas9-gRNA, Cas9, and NLS; pDNA-NLS conjugates | <a href="#">Hao et al. 2017</a> ; <a href="#">Kim et al. 2017</a> ; <a href="#">Mout et al. 2017</a> ; <a href="#">Hao et al. 2017</a> ; <a href="#">Kim et al. 2017</a> ; <a href="#">Mout et al. 2017</a>                                                                                                  |
| <b>Small Molecules</b>             | Dexamethasone (Dex)                                                  | Dex binds to nuclear membrane glucocorticoid receptor and dilates NPC; enhances affinity of polycations to nuclear membrane                   | HA/PEI <sub>1800</sub> -Dex/pDNA ternary complexes                                                                | <a href="#">Fan et al. 2013</a> ; <a href="#">Fan et al. 2013</a>                                                                                                                                                                                                                                            |

3780 **Abbreviations:** CD, cluster of differentiation (receptor); ALK<sup>+</sup>, anaplastic lymphoma kinase; ACLC, anaplastic large cell lymphoma;  
 3781 siRNA, small interfering RNA; ASO, antisense oligonucleotide; GLP1, glucagon-like peptide 1; GLP1R, glucagon-like peptide 1  
 3782 receptor; ~~CNS, central nervous system~~; TAT, transactivator of transcription (peptide); EED, endosomal escape domain; CPP, cell-  
 3783 penetrating peptide; R8, Octa-Arg (peptide); GalNAc, N-acetylgalactosamine; ASGPR, asialoglycoprotein receptor; BIV, bilamellar

## Virus Structure and Mechanism Inform the Design of Nucleic Acid Delivery Systems

3784 invaginated vesicle; miRNA, microRNA; mAb-SA, streptavidin-conjugated monoclonal antibody; HER2, human epidermal growth  
3785 factor 2; IgG4, immunoglobulin G4; AML, acute myeloid leukemia; HA2, hemagglutinin 2 (peptide); GALA, Glu-Ala-Leu-Ala (peptide);  
3786 ~~OEC, oligonucleotide enhancing compound~~; pDNA, plasmid DNA; SSO, splice-switching oligonucleotide; ~~CAD, cationic amphiphilic~~  
3787 ~~drug~~; PEI, polyethylenimine; pDMAEA, dimethylaminoethyl methacrylate; PImPAA, P(N-(3-(1H-imidazol-1-yl)propyl)acrylamide);  
3788 pBA, poly(butyl acrylate); PAA, propylacrylic acid; DOPE, dioleoylphosphatidylethanolamine; DTS, DNA nuclear targeting sequence;  
3789 SV40, simian 40 virus; ~~NLS, nucleus localization signal~~; NFκB, nuclear factor kappa-light-chain-enhancer of activated B cells; ~~DBP,~~  
3790 ~~dynein-binding protein~~; dsRNA, double-stranded RNA; AuNP, gold nanoparticle; CRISPR-Cas9-gRNA, clustered regularly spaced  
3791 palindromic sequences (CRISPR) CRISPR-associated (Cas9) guide RNA; NPC, nuclear pore complex; HA, hyaluronic acid  
3792

## Virus Structure and Mechanism Inform the Design of Nucleic Acid Delivery Systems

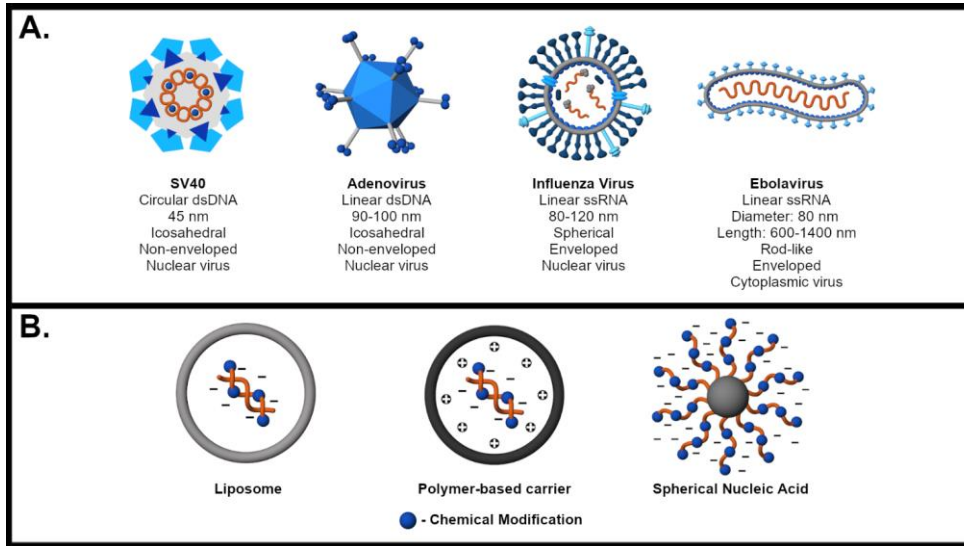

3793  
3794 **Figure 2. Mechanisms to protect nucleic acid cargo. A.** Examples of common viruses. Despite  
3795 structural diversity, viruses collectively protect their genome through charge condensation and  
3796 encapsulation by a capsid and, for an enveloped virus, an outer lipid membrane. **B.** Examples of  
3797 nonviral nucleic acid delivery systems. Beyond condensation and encapsulation, nonviral carriers also  
3798 use chemical modifications, self-generated sterics, or a combination of strategies to achieve the same  
3799 purpose.

3800

- Formatted: Font: Bold
- Formatted: Font: Bold, Font color: Auto
- Formatted: Justified
- Formatted: Font color: Auto
- Formatted: Font color: Auto
- Formatted: Font color: Auto
- Formatted: Font color: Auto, Not Highlight
- Formatted: Font color: Auto
- Formatted: Font: Bold, Font color: Auto
- Formatted: Font color: Auto
- Formatted: Font color: Auto
- Formatted: Font: Not Bold



Virus Structure and Mechanism Inform the Design of Nucleic Acid Delivery Systems

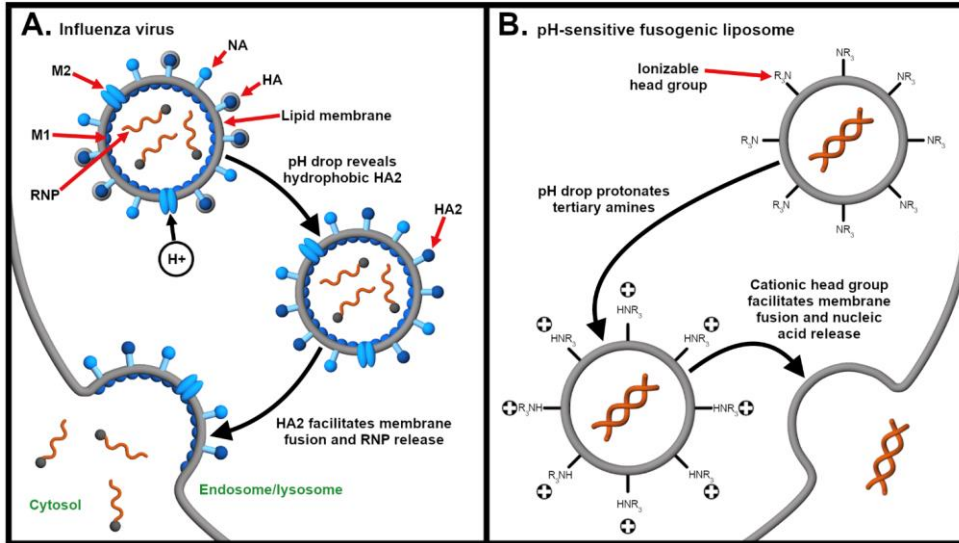

3820

3821

3822

3823

3824

3825

3826

3827

3828

3829

3830

3831

3832

3833

Formatted: Font: Bold

Formatted: Justified

Formatted: Font: Bold

Formatted: Not Highlight

Formatted: Font: Bold

**Figure 4. Endocytosis provides an opportunity for integrating stimulus-responsive nucleic acid release.** **A.** The influenza virus releases its genome (complexed with nucleoproteins, gray spheres) into the cytosol in a pH-dependent manner. Endosomal acidification drives the influx of protons through the Matrix Protein 2 (M2) ionophore. This liberates the ribonucleoprotein (RNP) complex from Matrix Protein 1 (M1) and exposes the fusogenic subunit HA2, which, in turn, facilitates fusion of the viral and endosomal membranes (Pinto, Holsinger, and Lamb et al. 1992). Neuraminidase (NA) enables release of the influenza virus from the host cell after replication (James and Whitley 2017). **B.** On the other hand, pH-responsive fusogenic liposomes are composed of ionizable lipids with weakly basic head groups that are rapidly protonated as the pH drops in the endosomes. This enables the protonated lipids to promote fusion and nucleic acid release before lysosomal degradation (Budker et al. 1996; Kogure et al. 2008; Sato et al. 2012).







## Virus Structure and Mechanism Inform the Design of Nucleic Acid Delivery Systems

3863 [moieties for endosomal escape. Conclusively, this modular protein is able to efficiently deliver nucleic](#)  
3864 [acid cargos including pDNA, dsRNA and siRNA \(M. T. de P. Favaro et al. 2018\).](#)

Formatted: Not Highlight
